# Supplementary material for: Genome-driven discovery of new serrawettin W2 analogues from Serratia fonticola DSM 4576
Source: Royal Society of Chemistry journal article supplement (doi:10.1039/d3ob01642k), 2023-01-01
Supplement: d3ob01642k1.pdf [file d3ob01642k1.pdf]

# Supplementary Information

## Genome-driven discovery of new serrawettin W2 analogues from *Serratia fonticola* DSM 4576

Haolin Qiu <sup>a</sup>, Yang Xiao <sup>a</sup>, Ling Shen <sup>a</sup>, Tao Han <sup>a</sup>, Qiang He <sup>c</sup>, Aiying Li <sup>d</sup>, Peng Zhang <sup>a</sup> and

Xiaofeng Cai <sup>a,b</sup>

<sup>a</sup>*School of Pharmacy, Tongji Medical College of Huazhong University of Science and Technology, Hubei Key Laboratory of Natural Medicinal Chemistry and Resource Evaluation, Wuhan 430030, People's Republic of China.*

<sup>b</sup>*State Key Laboratory of Dao-di Herbs, Beijing 100700, P. R. China.*

<sup>c</sup>*Xianning Public Inspection Center of Hubei Province, Xianning 437000, P. R. China.*

<sup>d</sup>*Helmholtz International Lab for Anti-Infectives, Shandong University-Helmholtz Institute of Biotechnology, State Key Laboratory of Microbial Technology, Shandong University, Qingdao 266237, P.R. China.*

\*Corresponding authors.

E-mail: caixiaofeng@hust.edu.cn

## Contents

|                                                                                                                                             |    |
|---------------------------------------------------------------------------------------------------------------------------------------------|----|
| <b>Table S1</b> A domain specificity prediction of <i>sefA</i> .....                                                                        | 1  |
| <b>Table S2</b> HRESIMS data of natural and synthetic compounds.....                                                                        | 1  |
| <b>Table S3</b> Bacterial strains used in this study.....                                                                                   | 1  |
| <b>Table S4</b> Primers used in this study.....                                                                                             | 1  |
| <b>Table S5</b> Plasmids used in this study.....                                                                                            | 2  |
| <b>Table S6</b> <sup>1</sup> H (400 MHz) and <sup>13</sup> C (100 MHz) NMR data for <b>1</b> in DMSO- <i>d</i> <sub>6</sub> (δ in ppm)..... | 2  |
| <b>Table S7</b> <sup>1</sup> H (400 MHz) and <sup>13</sup> C (100 MHz) NMR data for <b>2</b> in DMSO- <i>d</i> <sub>6</sub> (δ in ppm)..... | 3  |
| <b>Table S8</b> <sup>1</sup> H (400 MHz) and <sup>13</sup> C (100 MHz) NMR data for <b>3</b> in DMSO- <i>d</i> <sub>6</sub> (δ in ppm)..... | 4  |
| <b>Table S9</b> <sup>1</sup> H (400 MHz) and <sup>13</sup> C (100 MHz) NMR data for <b>4</b> in DMSO- <i>d</i> <sub>6</sub> (δ in ppm)..... | 5  |
| <b>Fig. S1</b> Alignment of <i>sefA</i> and other similar BGCs.....                                                                         | 6  |
| <b>Fig. S2</b> Molecular network.....                                                                                                       | 7  |
| <b>Fig. S3</b> <sup>1</sup> H- <sup>1</sup> H COSY and key <sup>1</sup> H- <sup>13</sup> C HMBC correlations of compounds <b>1-4</b> .....  | 8  |
| <b>Fig. S4</b> MS/MS spectra and fragmentation pathways with proposed fragment structures for <b>1</b> .....                                | 9  |
| <b>Fig. S5</b> MS/MS spectra and fragmentation pathways with proposed fragment structures for <b>2</b> .....                                | 10 |
| <b>Fig. S6</b> MS/MS spectra and fragmentation pathways with proposed fragment structures for <b>3</b> .....                                | 11 |
| <b>Fig. S7</b> MS/MS spectra and fragmentation pathways with proposed fragment structures for <b>4</b> .....                                | 12 |
| <b>Fig S8</b> MS/MS spectra of other nodes from the molecular network.....                                                                  | 14 |
| <b>Fig. S9</b> Configuration determination of amino acids in 1-4 using the Marfey's method.....                                             | 16 |
| <b>Fig. S10</b> <sup>1</sup> H NMR (400 MHz, DMSO- <i>d</i> <sub>6</sub> ) spectrum of sefopeptides A ( <b>1</b> ).....                     | 17 |
| <b>Fig. S11</b> <sup>13</sup> C NMR (100 MHz, DMSO- <i>d</i> <sub>6</sub> ) spectrum of sefopeptides A ( <b>1</b> ).....                    | 18 |
| <b>Fig. S12</b> DEPT-135 (100 MHz, DMSO- <i>d</i> <sub>6</sub> ) spectrum of sefopeptides A ( <b>1</b> ).....                               | 19 |
| <b>Fig. S13</b> HSQC (DMSO- <i>d</i> <sub>6</sub> ) spectrum of sefopeptides A ( <b>1</b> ).....                                            | 20 |
| <b>Fig. S14</b> <sup>1</sup> H- <sup>13</sup> C HMBC (DMSO- <i>d</i> <sub>6</sub> ) spectrum of sefopeptides A ( <b>1</b> ).....            | 21 |
| <b>Fig. S15</b> <sup>1</sup> H- <sup>1</sup> H COSY (DMSO- <i>d</i> <sub>6</sub> ) spectrum of sefopeptides A ( <b>1</b> ).....             | 22 |
| <b>Fig. S16</b> <sup>1</sup> H NMR (400 MHz, DMSO- <i>d</i> <sub>6</sub> ) spectrum of sefopeptides B ( <b>2</b> ).....                     | 23 |
| <b>Fig. S17</b> <sup>13</sup> C NMR (100 MHz, DMSO- <i>d</i> <sub>6</sub> ) spectrum of sefopeptides B ( <b>2</b> ).....                    | 24 |
| <b>Fig. S18</b> DEPT-135 (100 MHz, DMSO- <i>d</i> <sub>6</sub> ) spectrum of sefopeptides B ( <b>2</b> ).....                               | 25 |
| <b>Fig. S19</b> HSQC (DMSO- <i>d</i> <sub>6</sub> ) spectrum of sefopeptides B ( <b>2</b> ).....                                            | 26 |
| <b>Fig. S20</b> <sup>1</sup> H- <sup>13</sup> C HMBC (DMSO- <i>d</i> <sub>6</sub> ) spectrum of sefopeptides B ( <b>2</b> ).....            | 27 |
| <b>Fig. S21</b> <sup>1</sup> H- <sup>1</sup> H COSY (DMSO- <i>d</i> <sub>6</sub> ) spectrum of sefopeptides B ( <b>2</b> ).....             | 28 |
| <b>Fig. S22</b> <sup>1</sup> H NMR (400 MHz, DMSO- <i>d</i> <sub>6</sub> ) spectrum of sefopeptides C ( <b>3</b> ).....                     | 29 |
| <b>Fig. S23</b> <sup>13</sup> C NMR (100 MHz, DMSO- <i>d</i> <sub>6</sub> ) spectrum of sefopeptides C ( <b>3</b> ).....                    | 30 |
| <b>Fig. S24</b> DEPT-135 (100 MHz, DMSO- <i>d</i> <sub>6</sub> ) spectrum of sefopeptides C ( <b>3</b> ).....                               | 31 |
| <b>Fig. S25</b> HSQC (DMSO- <i>d</i> <sub>6</sub> ) spectrum of sefopeptides C ( <b>3</b> ).....                                            | 32 |
| <b>Fig. S26</b> <sup>1</sup> H- <sup>13</sup> C HMBC (DMSO- <i>d</i> <sub>6</sub> ) spectrum of sefopeptides C ( <b>3</b> ).....            | 33 |
| <b>Fig. S27</b> <sup>1</sup> H- <sup>1</sup> H COSY (DMSO- <i>d</i> <sub>6</sub> ) spectrum of sefopeptides C ( <b>3</b> ).....             | 34 |
| <b>Fig. S28</b> <sup>1</sup> H NMR (400 MHz, DMSO- <i>d</i> <sub>6</sub> ) spectrum of sefopeptides D ( <b>4</b> ).....                     | 35 |

|                                                                                                                      |    |
|----------------------------------------------------------------------------------------------------------------------|----|
| <b>Fig. S29</b> $^{13}\text{C}$ NMR (100 MHz, $\text{DMSO-}d_6$ ) spectrum of sefopeptides D ( <b>4</b> ). .....     | 36 |
| <b>Fig. S30</b> DEPT-135 (100 MHz, $\text{DMSO-}d_6$ ) spectrum of sefopeptides D ( <b>4</b> ). .....                | 37 |
| <b>Fig. S31</b> HSQC ( $\text{DMSO-}d_6$ ) spectrum of sefopeptides D ( <b>4</b> ). .....                            | 38 |
| <b>Fig. S32</b> $^1\text{H-}^{13}\text{C}$ HMBC ( $\text{DMSO-}d_6$ ) spectrum of sefopeptides D ( <b>4</b> ). ..... | 39 |
| <b>Fig. S33</b> $^1\text{H-}^1\text{H}$ COSY ( $\text{DMSO-}d_6$ ) spectrum of sefopeptides D ( <b>4</b> ). .....    | 40 |

**Table S1** A domain specificity prediction of *sefA*.

| A domain | Stachelhaus sequence | most likely amino acid predicted | amino acid detected |
|----------|----------------------|----------------------------------|---------------------|
| A1       | DASTVAAVCK           | Tyr                              | Tyr                 |
| A2       | DAYFLGVTYK           | Val                              | Ile                 |
| A3       | DALFIGCVFK           | Leu                              | Leu                 |
| A4       | DALFVGGVWK           | Val                              | Phe                 |
| A5       | DVWHFSLVDK           | Ser                              | Ser                 |

**Table S2** HRESIMS data of natural and synthetic compounds.

| compound          | sum formula                                                   | calcd. [M + H] <sup>+</sup> | found [M + H] <sup>+</sup> | Δppm |
|-------------------|---------------------------------------------------------------|-----------------------------|----------------------------|------|
| sefopeptide A (1) | C <sub>47</sub> H <sub>71</sub> N <sub>5</sub> O <sub>9</sub> | 850.5325                    | 850.5326                   | 0.17 |
| sefopeptide B (2) | C <sub>45</sub> H <sub>67</sub> N <sub>5</sub> O <sub>9</sub> | 822.5012                    | 822.5022                   | 1.27 |
| sefopeptide C (3) | C <sub>48</sub> H <sub>71</sub> N <sub>5</sub> O <sub>9</sub> | 862.5325                    | 862.5335                   | 1.21 |
| sefopeptide D (4) | C <sub>49</sub> H <sub>73</sub> N <sub>5</sub> O <sub>9</sub> | 876.5481                    | 876.5470                   | 1.26 |

**Table S3** Bacterial strains used in this study.

| strain                             | genotype                                                                                                                                                                                                                                |
|------------------------------------|-----------------------------------------------------------------------------------------------------------------------------------------------------------------------------------------------------------------------------------------|
| <i>E. coli</i> DH10B               | F- <i>mcrA</i> , Δ( <i>mrr-hsdRMS-mcrBC</i> ), Φ80 <i>lacZ</i> ΔM15, Δ <i>lacX74</i> , <i>endA1</i> , <i>recA1</i> , <i>deoR</i> , Δ( <i>ara leu</i> )7697, <i>araD139</i> , <i>galU</i> , <i>galK</i> , <i>rpsL</i> , <i>nupG</i> , λ- |
| <i>E. coli</i> BAP1                | BL21(DE3) Δ <i>prpRBCD</i> ::T7prom- <i>sfp</i> , T7prom- <i>prpE</i> <sup>1</sup>                                                                                                                                                      |
| <i>Serratia fonticola</i> DSM 4576 | wild type                                                                                                                                                                                                                               |

**Table S4** Primers used in this study.

| primer | sequence (5'-3')                                              | targeting DNA fragment                                                      | plasmid |
|--------|---------------------------------------------------------------|-----------------------------------------------------------------------------|---------|
| Duet-F | TGCTTAAGTCGAACAGAAA                                           | pCOLA-Duet vector backbone (3629 bp)                                        | pHL1    |
| Duet-R | GGTATATCTCCTTATTAAAG                                          |                                                                             |         |
| sef1-F | TTTTGTTTAACTTTAATAAGGAGAT<br>ATACCATGGCGAATAATATGGAAA<br>GAAT | fragment I of <i>sefA</i> from <i>Serratia fonticola</i> DSM4576 (9678 bp)  |         |
| sef1-R | GGCGACAGAATGATGCTCAA                                          |                                                                             |         |
| sef2-F | CTAAAGGGGTGATGATTGAGC                                         | fragment II of <i>sefA</i> from <i>Serratia fonticola</i> DSM4576 (9782 bp) |         |
| sef2-R | AATACGATTACTTTCTGTTCTGACTTA<br>AGCATTAGCGGATGTGGCTAATCA       |                                                                             |         |

**Table S5** Plasmids used in this study.

| plasmid    | genotype/description                                                                                                 |
|------------|----------------------------------------------------------------------------------------------------------------------|
| pCOLA-Duet | 3,719 bp, contains T7 promoter, Km <sup>R</sup>                                                                      |
| pHL1       | 22,994bp, <i>sefA</i> from <i>Serratia fonticola</i> DSM 4576 genomic DNA assembled into pCOLA-Duet, Km <sup>R</sup> |

**Table S6** <sup>1</sup>H (400 MHz) and <sup>13</sup>C (100 MHz) NMR data for **1** in DMSO-*d*<sub>6</sub> (δ in ppm).

| Subunit                          | Position | δ <sub>C</sub> , type  | δ <sub>H</sub> (J [Hz]) | Subunit | Position | δ <sub>C</sub> , type  | δ <sub>H</sub> (J [Hz]) |
|----------------------------------|----------|------------------------|-------------------------|---------|----------|------------------------|-------------------------|
| (R)-3-Hydroxy-tetradecanoic Acid | 1        | 168.68, C              |                         |         | 28       | 35.28, CH              | 1.52, m                 |
|                                  | 2a       | 39.41, CH <sub>2</sub> | 2.22, dd (14.1, 3.0)    |         | 29       | 24.69, CH <sub>2</sub> | 0.89, m                 |
|                                  | 2b       |                        | 2.44, overlap           |         | 30       | 10.32, CH <sub>3</sub> | 0.70, overlap           |
|                                  | 3        | 71.64, CH              | 4.94, m                 |         | 31       | 14.83, CH <sub>3</sub> | 0.70, overlap           |
|                                  | 4        | 33.07, CH <sub>2</sub> | 1.46, m                 |         | 32       | 172.87, C              |                         |
|                                  | 5        | 24.14, CH <sub>2</sub> | 1.23, m                 | Leu     | 33       |                        | 8.68, d (5.7)           |
|                                  | 6        | 29.13, CH <sub>2</sub> | 1.23, m                 |         | 34       | 52.42, CH              | 3.88, overlap           |
|                                  | 7        | 29.04, CH <sub>2</sub> | 1.23, m                 |         | 35       | 39.08, CH <sub>2</sub> | 1.26, m                 |
|                                  | 8        | 29.02, CH <sub>2</sub> | 1.23, m                 |         | 36       | 23.71, CH              | 1.23, m                 |
|                                  | 9        | 28.93, CH <sub>2</sub> | 1.23, m                 |         | 37       | 21.45, CH <sub>3</sub> | 0.70, overlap           |
|                                  | 10       | 28.83, CH <sub>2</sub> | 1.23, m                 |         | 38       | 22.66, CH <sub>3</sub> | 0.78, overlap           |
|                                  | 11       | 28.73, CH <sub>2</sub> | 1.23, m                 |         | 39       | 171.65, C              |                         |
|                                  | 12       | 31.29, CH <sub>2</sub> | 1.20, m                 | Phe     | 40       |                        | 8.11, d (5.4)           |
|                                  | 13       | 22.08, CH <sub>2</sub> | 1.22, m                 |         | 41       | 54.10, CH              | 4.32, m                 |
|                                  | 14       | 13.94, CH <sub>3</sub> | 0.82, overlap           |         | 42a      | 35.35, CH <sub>2</sub> | 2.84, t (12.7)          |
| Tyr                              | 15       |                        | 7.96, overlap           |         | 42b      |                        | 3.22, dd (13.9, 3.9)    |
|                                  | 16       | 53.23, CH              | 4.62, q (7.5)           |         | 43       | 138.64, C              |                         |
|                                  | 17a      | 37.55, CH <sub>2</sub> | 2.64, dd (13.5, 7.3)    |         | 44       | 129.18, CH             | 7.17, m                 |
|                                  | 17b      |                        | 2.75, dd (13.5, 7.1)    |         | 45       | 127.94, CH             | 7.24, m                 |
|                                  | 18       | 127.44, C              |                         |         | 46       | 126.07, CH             | 7.18, m                 |
|                                  | 19       | 130.03, CH             | 6.92, dd (8.7, 2.6)     |         | 47       | 127.94, CH             | 7.24, m                 |
|                                  | 20       | 114.74, CH             | 6.58, dd (8.7, 2.6)     |         | 48       | 129.18, CH             | 7.17, m                 |
|                                  | 21       | 155.73, C              |                         |         | 49       | 170.97, C              |                         |
|                                  | 22       | 114.74, CH             | 6.58, dd (8.7, 2.6)     | Ser     | 50       |                        | 7.44, s                 |
|                                  | 23       | 130.03, CH             | 6.92, dd (8.7, 2.6)     |         | 51       | 56.27, CH              | 4.06, q (6.0)           |
|                                  | 24       |                        | 9.12, s                 |         | 52a      | 61.18, CH <sub>2</sub> | 3.62, m                 |
|                                  | 25       | 171.03, C              |                         |         | 52b      |                        | 3.67, m                 |
| Ile                              | 26       |                        | 7.99, overlap           |         | 53       |                        | 4.82, t (6.7)           |
|                                  | 27       | 56.94, CH              | 3.89, overlap           |         | 54       | 169.56, C              |                         |

**Table S7**  $^1\text{H}$  (400 MHz) and  $^{13}\text{C}$  (100 MHz) NMR data for **2** in  $\text{DMSO-}d_6$  ( $\delta$  in ppm).

| Subunit                        | Position  | $\delta_c$ , type    | $\delta_H$ (J [Hz])  | Subunit | Position             | $\delta_c$ , type    | $\delta_H$ (J [Hz]) |               |
|--------------------------------|-----------|----------------------|----------------------|---------|----------------------|----------------------|---------------------|---------------|
| (R)-3-                         | 1         | 168.68, C            |                      |         | 27                   | 24.69, $\text{CH}_2$ | 0.89, m             |               |
| Hydroxy-<br>dodecanoic<br>acid | 2a        | 39.41, $\text{CH}_2$ | 2.22, dd (14.1, 3.0) |         | 28                   | 10.32, $\text{CH}_3$ | 0.70, overlap       |               |
|                                | 2b        |                      | 2.44, overlap        |         | 29                   | 14.83, $\text{CH}_3$ | 0.70, overlap       |               |
|                                | 3         | 71.64, CH            | 4.94, m              |         | 30                   | 172.87, C            |                     |               |
|                                | 4         | 33.07, $\text{CH}_2$ | 1.46, m              | Leu     | 31                   |                      | 8.68, d (5.7)       |               |
|                                | 5         | 24.14, $\text{CH}_2$ | 1.23, m              |         | 32                   | 52.42, CH            | 3.88, overlap       |               |
|                                | 6         | 29.05, $\text{CH}_2$ | 1.23, m              |         | 33                   | 39.08, $\text{CH}_2$ | 1.26, m             |               |
|                                | 7         | 28.90, $\text{CH}_2$ | 1.23, m              |         | 34                   | 23.71, CH            | 1.23, m             |               |
|                                | 8         | 28.83, $\text{CH}_2$ | 1.23, m              |         | 35                   | 21.45, $\text{CH}_3$ | 0.70, overlap       |               |
|                                | 9         | 28.78, $\text{CH}_2$ | 1.23, m              |         | 36                   | 22.66, $\text{CH}_3$ | 0.78, overlap       |               |
|                                | 10        | 31.29, $\text{CH}_2$ | 1.20, m              |         | 37                   | 171.65, C            |                     |               |
|                                | 11        | 22.08, $\text{CH}_2$ | 1.22, m              |         | Phe                  | 38                   |                     | 8.11, d (5.4) |
|                                | 12        | 13.94, $\text{CH}_3$ | 0.82, overlap        |         | 39                   | 54.10, CH            | 4.32, m             |               |
| Tyr                            | 13        |                      | 7.96, overlap        | 40a     | 35.35, $\text{CH}_2$ | 2.84, t (12.7)       |                     |               |
|                                | 14        | 53.23, CH            | 4.62, q (7.5)        | 40b     |                      | 3.22, dd (13.9, 3,9) |                     |               |
|                                | 15a       | 37.55, $\text{CH}_2$ | 2.64, dd (13.5, 7.3) | 41      | 138.64, C            |                      |                     |               |
|                                | 15b       |                      | 2.75, dd (13.5, 7.1) | 42      | 129.18, CH           | 7.17, m              |                     |               |
|                                | 16        | 127.44, C            |                      | 43      | 127.94, CH           | 7.24, m              |                     |               |
|                                | 17        | 130.03, CH           | 6.92, dd (8.7, 2.6)  | 44      | 126.07, CH           | 7.18, m              |                     |               |
|                                | 18        | 114.74, CH           | 6.58, dd (8.7, 2.6)  | 45      | 127.94, CH           | 7.24, m              |                     |               |
|                                | 19        | 155.73, C            |                      | 46      | 129.18, CH           | 7.17, m              |                     |               |
|                                | 20        | 114.74, CH           | 6.58, dd (8.7, 2.6)  | 47      | 170.97, C            |                      |                     |               |
|                                | 21        | 130.03, CH           | 6.92, dd (8.7, 2.6)  | Ser     | 48                   |                      | 7.44, s             |               |
|                                | 22        |                      | 9.12, s              |         | 49                   | 56.27, CH            | 4.06, q (6.0)       |               |
| 23                             | 171.03, C |                      |                      | 50a     | 61.18, $\text{CH}_2$ | 3.62, m              |                     |               |
| Ile                            | 24        |                      | 7.99, overlap        | 50b     |                      | 3.67, m              |                     |               |
|                                | 25        | 56.94, CH            | 3.89, overlap        | 51      |                      | 4.82, t (6.7)        |                     |               |
|                                | 26        | 35.28, CH            | 1.52, m              | 52      | 169.56, C            |                      |                     |               |

**Table S8**  $^1\text{H}$  (400 MHz) and  $^{13}\text{C}$  (100 MHz) NMR data for **3** in  $\text{DMSO-}d_6$  ( $\delta$  in ppm).

| Subunit                      | Position | $\delta_c$ , type      | $\delta_H$ (J [Hz])  | Subunit | Position | $\delta_c$ , type      | $\delta_H$ (J [Hz])  |
|------------------------------|----------|------------------------|----------------------|---------|----------|------------------------|----------------------|
| (3 <i>R</i> ,8 <i>Z</i> )-3- | 1        | 168.68, C              |                      |         | 29       | 35.28, CH              | 1.52, m              |
| Hydroxy-8-                   | 2a       | 39.41, CH <sub>2</sub> | 2.22, dd (14.1, 3.0) |         | 30       | 24.69, CH <sub>2</sub> | 0.89, m              |
| pentadecenoic                | 2b       |                        | 2.44, overlap        |         | 31       | 10.32, CH <sub>3</sub> | 0.70, overlap        |
| acid                         | 3        | 71.63, CH              | 4.94, m              |         | 32       | 14.83, CH <sub>3</sub> | 0.70, overlap        |
|                              | 4        | 33.08, CH <sub>2</sub> | 1.46, m              |         | 33       | 172.87, C              |                      |
|                              | 5        | 24.07, CH <sub>2</sub> | 1.24, m              | Leu     | 34       |                        | 8.68, d (5.7)        |
|                              | 6        | 29.17, CH <sub>2</sub> | 1.24, m              |         | 35       | 52.42, CH              | 3.88, overlap        |
|                              | 7        | 26.57, CH <sub>2</sub> | 1.99, p (6.0)        |         | 36       | 39.08, CH <sub>2</sub> | 1.26, m              |
|                              | 8        | 129.65, CH             | 5.34, overlap        |         | 37       | 23.71, CH              | 1.23, m              |
|                              | 9        | 129.63, CH             | 5.34, overlap        |         | 38       | 21.45, CH <sub>3</sub> | 0.70, overlap        |
|                              | 10       | 26.57, CH <sub>2</sub> | 1.99, p (6.0)        |         | 39       | 22.66, CH <sub>3</sub> | 0.78, overlap        |
|                              | 11       | 28.83, CH <sub>2</sub> | 1.30, m              |         | 40       | 171.65, C              |                      |
|                              | 12       | 28.49, CH <sub>2</sub> | 1.24, m              | Phe     | 41       |                        | 8.11, d (5.4)        |
|                              | 13       | 30.86, CH <sub>2</sub> | 1.23, m              |         | 42       | 54.10, CH              | 4.32, m              |
|                              | 14       | 21.98, CH <sub>2</sub> | 1.24, m              |         | 43a      | 35.35, CH <sub>2</sub> | 2.84, t (12.7)       |
|                              | 15       | 13.93, CH <sub>3</sub> | 0.82, overlap        |         | 43b      |                        | 3.22, dd (13.9, 3.9) |
| Tyr                          | 16       |                        | 7.96, overlap        |         | 44       | 138.64, C              |                      |
|                              | 17       | 53.23, CH              | 4.62, q (7.5)        |         | 45       | 129.18, CH             | 7.17, m              |
|                              | 18a      | 37.55, CH <sub>2</sub> | 2.64, dd (13.5, 7.3) |         | 46       | 127.94, CH             | 7.24, m              |
|                              | 18b      |                        | 2.75, dd (13.5, 7.1) |         | 47       | 126.07, CH             | 7.18, m              |
|                              | 19       | 127.44, C              |                      |         | 48       | 127.94, CH             | 7.24, m              |
|                              | 20       | 130.03, CH             | 6.92, dd (8.7, 2.6)  |         | 49       | 129.18, CH             | 7.17, m              |
|                              | 21       | 114.74, CH             | 6.58, dd (8.7, 2.6)  |         | 50       | 170.97, C              |                      |
|                              | 22       | 155.73, C              |                      | Ser     | 51       |                        | 7.44, s              |
|                              | 23       | 114.74, CH             | 6.58, dd (8.7, 2.6)  |         | 52       | 56.27, CH              | 4.06, q (6.0)        |
|                              | 24       | 130.03, CH             | 6.92, dd (8.7, 2.6)  |         | 53a      | 61.18, CH <sub>2</sub> | 3.62, m              |
|                              | 25       |                        | 9.12, s              |         | 53b      |                        | 3.67, m              |
|                              | 26       | 171.03, C              |                      |         | 54       |                        | 4.82, t (6.7)        |
| Ile                          | 27       |                        | 7.99, overlap        |         | 55       | 169.56, C              |                      |
|                              | 28       | 56.94, CH              | 3.89, overlap        |         |          |                        |                      |

**Table S9**  $^1\text{H}$  (400 MHz) and  $^{13}\text{C}$  (100 MHz) NMR data for **4** in  $\text{DMSO-}d_6$  ( $\delta$  in ppm).

| Subunit                                                 | Position               | $\delta_c$ , type      | $\delta_H$ (J [Hz])  | Subunit | Position               | $\delta_c$ , type      | $\delta_H$ (J [Hz]) |               |
|---------------------------------------------------------|------------------------|------------------------|----------------------|---------|------------------------|------------------------|---------------------|---------------|
| (3 <i>R</i> ,9 <i>Z</i> )-3-Hydroxy-9-hexadecenoic acid | 1                      | 168.68, C              |                      |         | 29                     | 56.94, CH              | 3.89, overlap       |               |
|                                                         | 2a                     | 39.41, CH <sub>2</sub> | 2.22, dd (14.1, 3.0) |         | 30                     | 35.28, CH              | 1.52, m             |               |
|                                                         | 2b                     |                        | 2.44, overlap        |         | 31                     | 24.69, CH <sub>2</sub> | 0.89, m             |               |
|                                                         | 3                      | 71.64, CH              | 4.94, m              |         | 32                     | 10.32, CH <sub>3</sub> | 0.70, overlap       |               |
|                                                         | 4                      | 33.09, CH <sub>2</sub> | 1.46, m              |         | 33                     | 14.83, CH <sub>3</sub> | 0.70, overlap       |               |
|                                                         | 5                      | 24.07, CH <sub>2</sub> | 1.23, m              |         | 34                     | 172.87, C              |                     |               |
|                                                         | 6                      | 28.28, CH <sub>2</sub> | 1.23, m              |         | Leu                    | 35                     |                     | 8.68, d (5.7) |
|                                                         | 7                      | 29.12, CH <sub>2</sub> | 1.28, m              |         | 36                     | 52.42, CH              | 3.88, overlap       |               |
|                                                         | 8                      | 26.58, CH <sub>2</sub> | 1.99, p (6.0)        |         | 37                     | 39.08, CH <sub>2</sub> | 1.26, m             |               |
|                                                         | 9                      | 129.63, CH             | 5.33, overlap        |         | 38                     | 23.71, CH              | 1.23, m             |               |
|                                                         | 10                     | 129.63, CH             | 5.33, overlap        |         | 39                     | 21.45, CH <sub>3</sub> | 0.70, overlap       |               |
|                                                         | 11                     | 26.61, CH <sub>2</sub> | 1.99, p (6.0)        |         | 40                     | 22.66, CH <sub>3</sub> | 0.78, overlap       |               |
|                                                         | 12                     | 29.17, CH <sub>2</sub> | 1.28, m              |         | 41                     | 171.65, C              |                     |               |
|                                                         | 13                     | 28.50, CH <sub>2</sub> | 1.23, m              |         | Phe                    | 42                     |                     | 8.11, d (5.4) |
|                                                         | 14                     | 31.14, CH <sub>2</sub> | 1.21, m              |         | 43                     | 54.10, CH              | 4.32, m             |               |
|                                                         | 15                     | 22.07, CH <sub>2</sub> | 1.23, m              |         | 44a                    | 35.35, CH <sub>2</sub> | 2.84, t (12.7)      |               |
| 16                                                      | 13.93, CH <sub>3</sub> | 0.82, overlap          |                      | 44b     |                        | 3.22, dd (13.9, 3.9)   |                     |               |
| Tyr                                                     | 17                     |                        | 7.96, overlap        | 45      | 138.64, C              |                        |                     |               |
|                                                         | 18                     | 53.23, CH              | 4.62, q (7.5)        | 46      | 129.18, CH             | 7.17, m                |                     |               |
|                                                         | 19a                    | 37.55, CH <sub>2</sub> | 2.64, dd (13.5, 7.3) | 47      | 127.94, CH             | 7.24, m                |                     |               |
|                                                         | 19b                    |                        | 2.75, dd (13.5, 7.1) | 48      | 126.07, CH             | 7.18, m                |                     |               |
|                                                         | 20                     | 127.44, C              |                      | 49      | 127.94, CH             | 7.24, m                |                     |               |
|                                                         | 21                     | 130.03, CH             | 6.92, dd (8.7, 2.6)  | 50      | 129.18, CH             | 7.17, m                |                     |               |
|                                                         | 22                     | 114.74, CH             | 6.58, dd (8.7, 2.6)  | 51      | 170.97, C              |                        |                     |               |
|                                                         | 23                     | 155.73, C              |                      | Ser     | 52                     |                        | 7.44, s             |               |
|                                                         | 24                     | 114.74, CH             | 6.58, dd (8.7, 2.6)  | 53      | 56.27, CH              | 4.06, q (6.0)          |                     |               |
|                                                         | 25                     | 130.03, CH             | 6.92, dd (8.7, 2.6)  | 54a     | 61.18, CH <sub>2</sub> | 3.62, m                |                     |               |
|                                                         | 26                     |                        | 9.12, s              | 54b     |                        | 3.67, m                |                     |               |
| 27                                                      | 171.03, C              |                        | 55                   |         | 4.82, t (6.7)          |                        |                     |               |
| Ile                                                     | 28                     |                        | 7.99, overlap        | 56      | 169.56, C              |                        |                     |               |



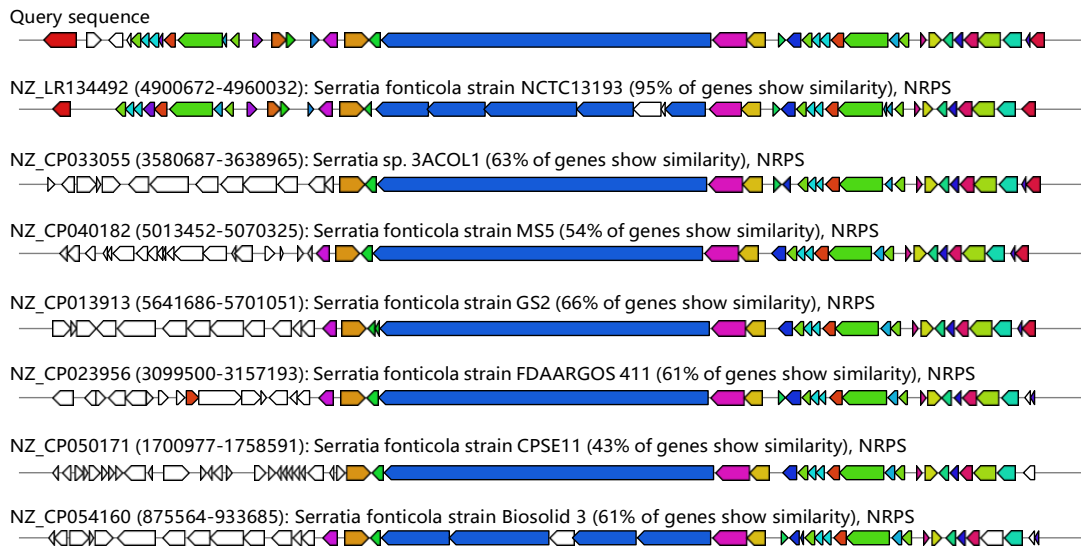

**Fig. S1** Alignment of *sefA* and other similar BGCs. Similarity analysis was accomplished using antiSMASH<sup>2</sup>.

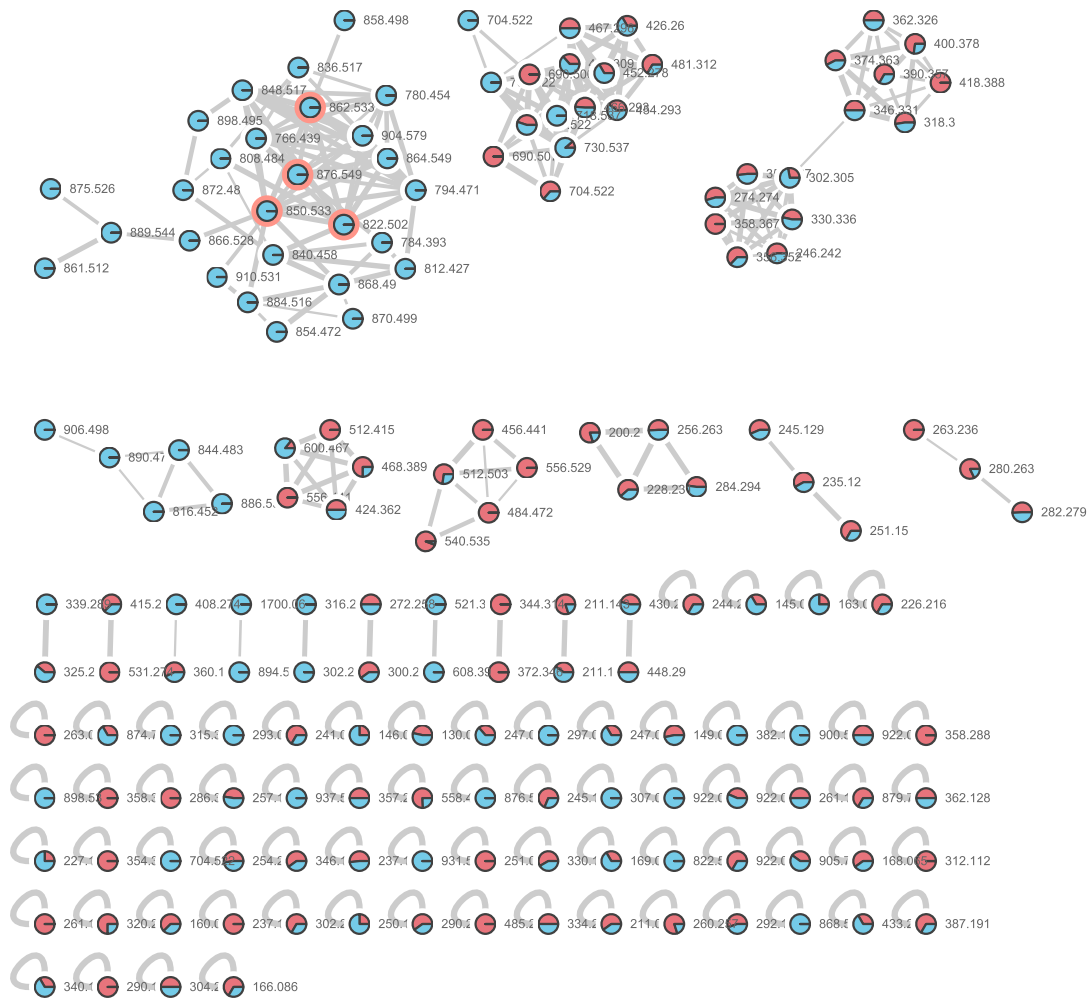

**Fig. S2** Molecular network of the secondary metabolites produced by *E. coli* BAP1 pHL1 and pCOLA-Duet generated using the HRLC-MS/MS data. Nodes are labelled with the corresponding  $m/z$  values (detected in the positive mode). The light blue nodes correspond to molecules present in *E. coli* BAP1 pHL1, while red nodes represent those found in *E. coli* BAP1 pCOLA-Duet. A blue-only node signifies its exclusive presence in *E. coli* BAP1 pHL1. The thickness of the lines indicates the strength of the association. sefopeptides A-D (**1-4**) are highlighted with red borders around the nodes.

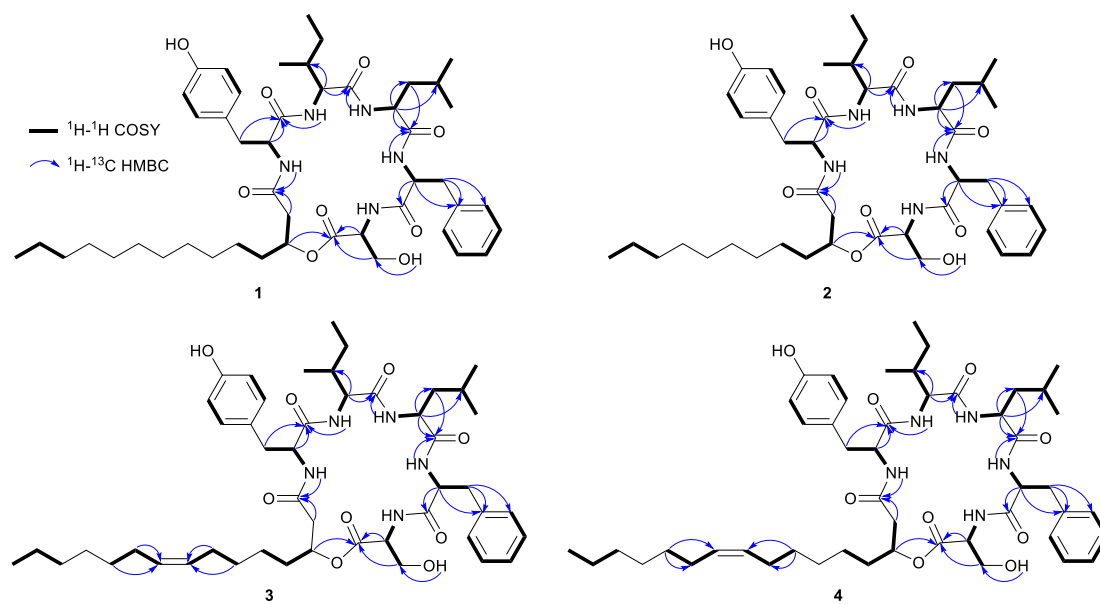

**Fig. S3**  $^1\text{H}$ - $^1\text{H}$  COSY and key  $^1\text{H}$ - $^{13}\text{C}$  HMBC correlations of compounds **1-4**.

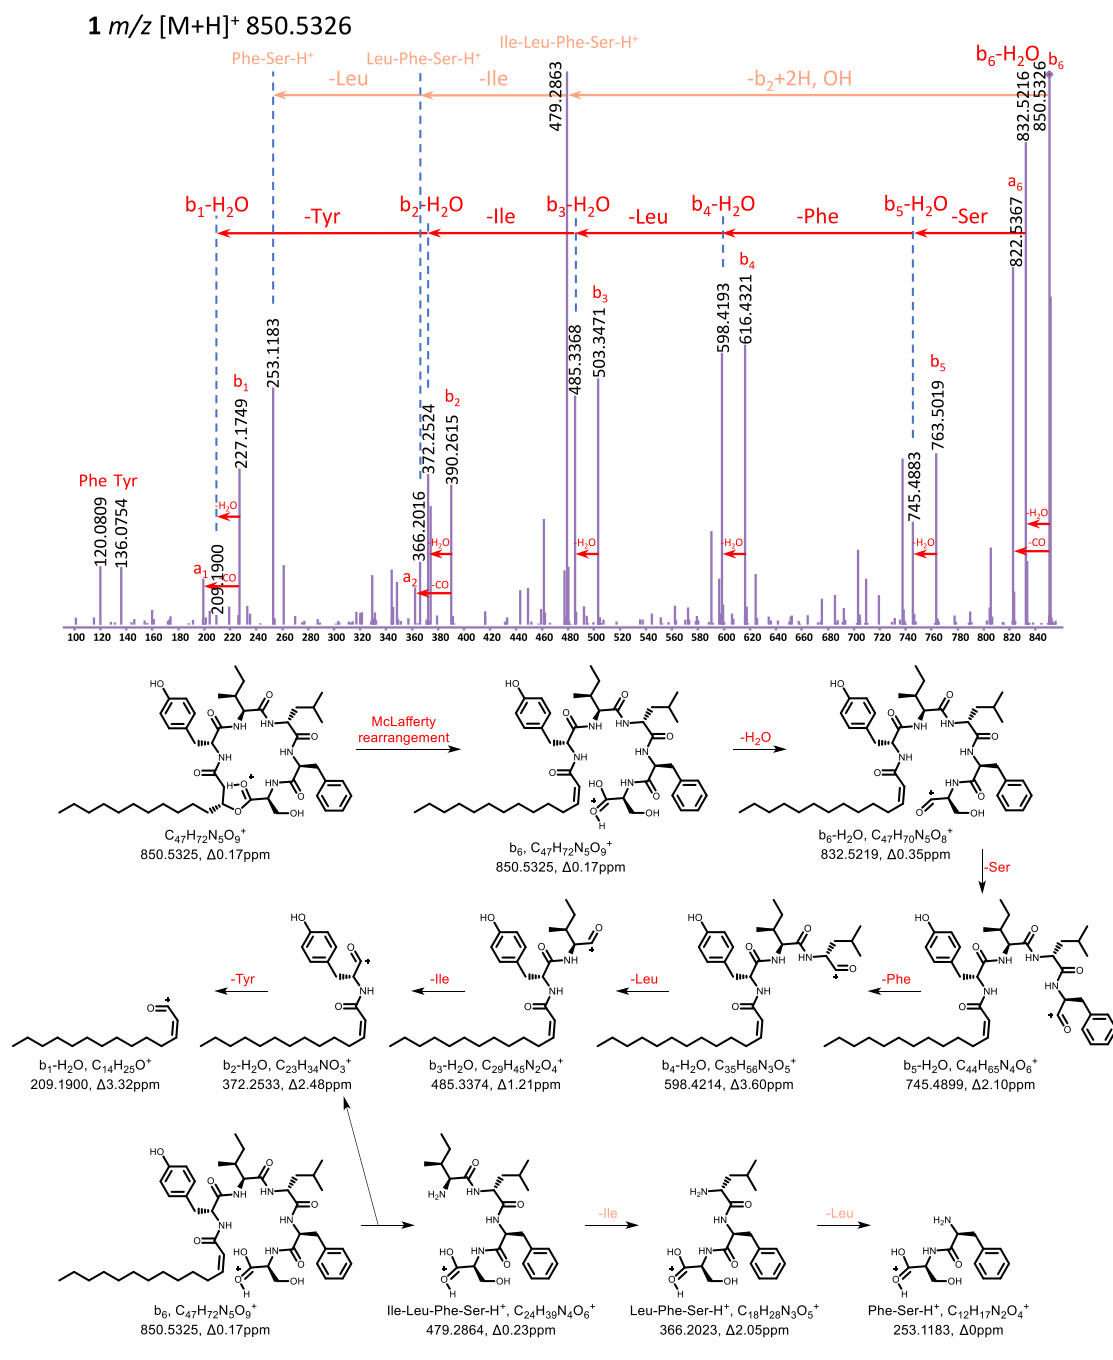

**Fig. S4** MS/MS spectra and fragmentation pathways with proposed fragment structures for **1**.

2  $m/z$  [M+H]<sup>+</sup> 822.5022

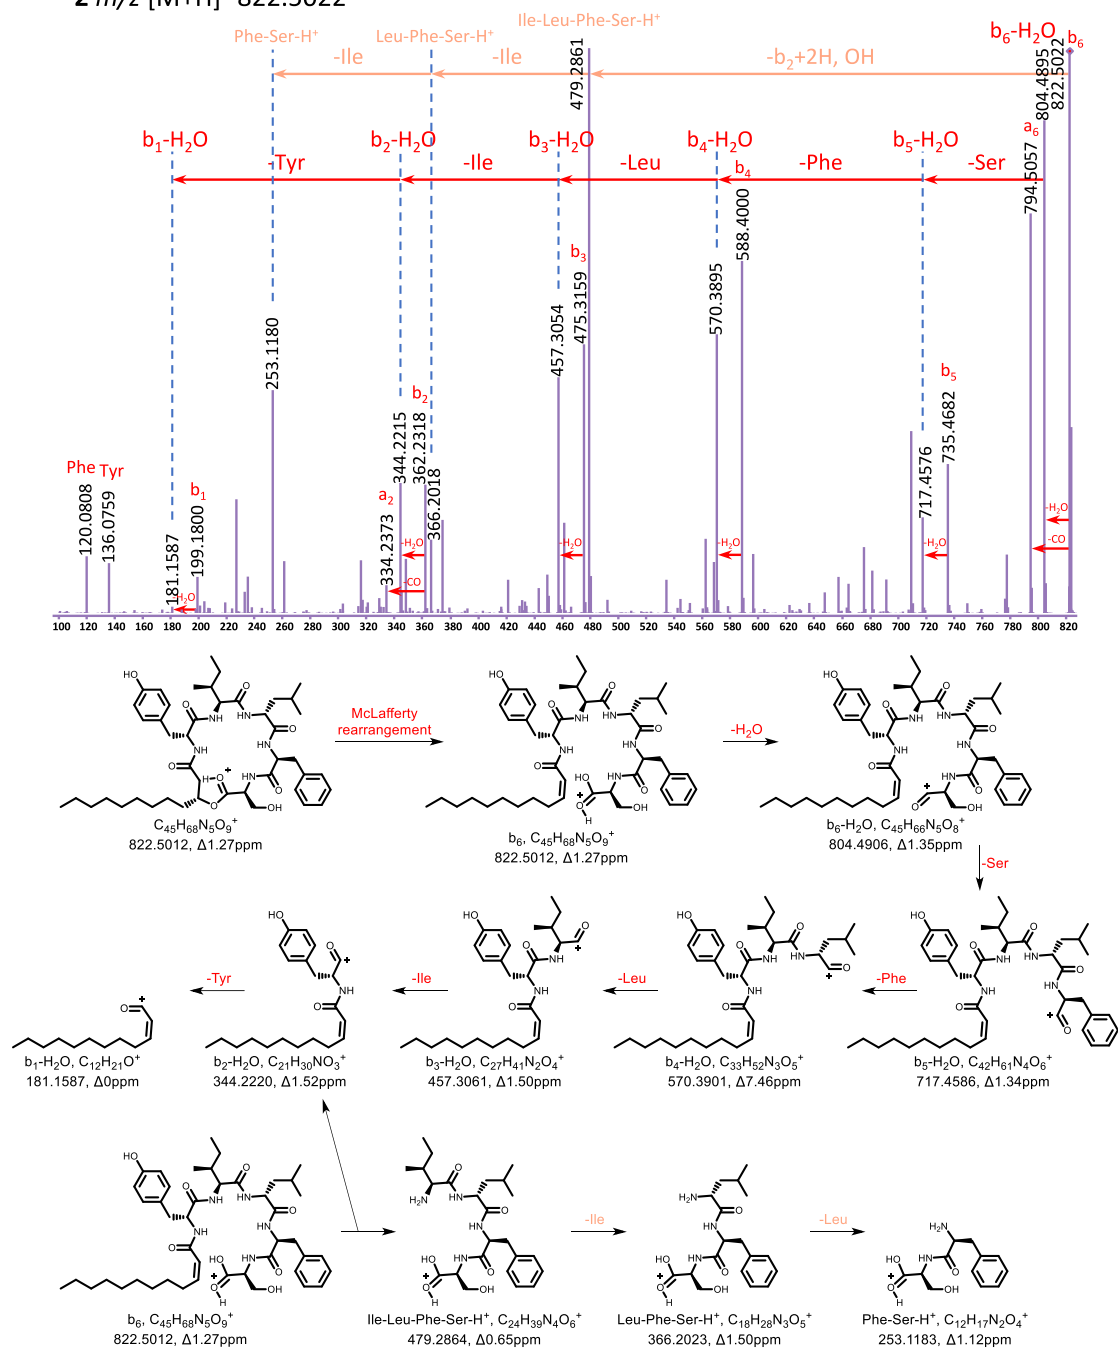

**Fig. S5** MS/MS spectra and fragmentation pathways with proposed fragment structures for **2**.

3  $m/z$   $[M+H]^+$  862.5335

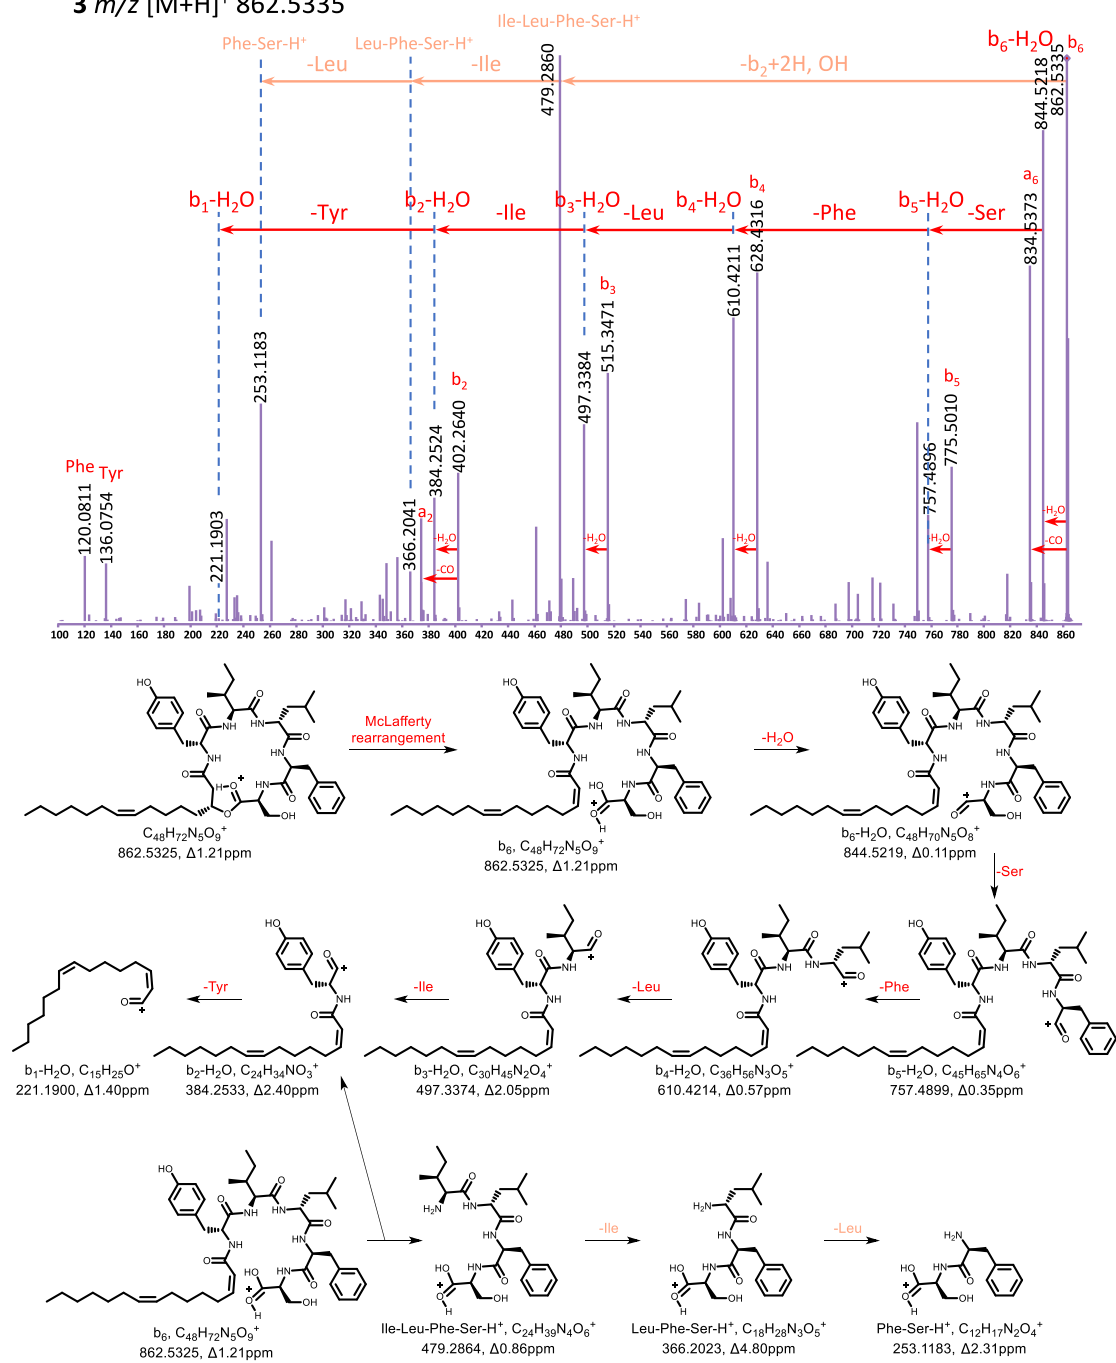

**Fig. S6** MS/MS spectra and fragmentation pathways with proposed fragment structures for 3.

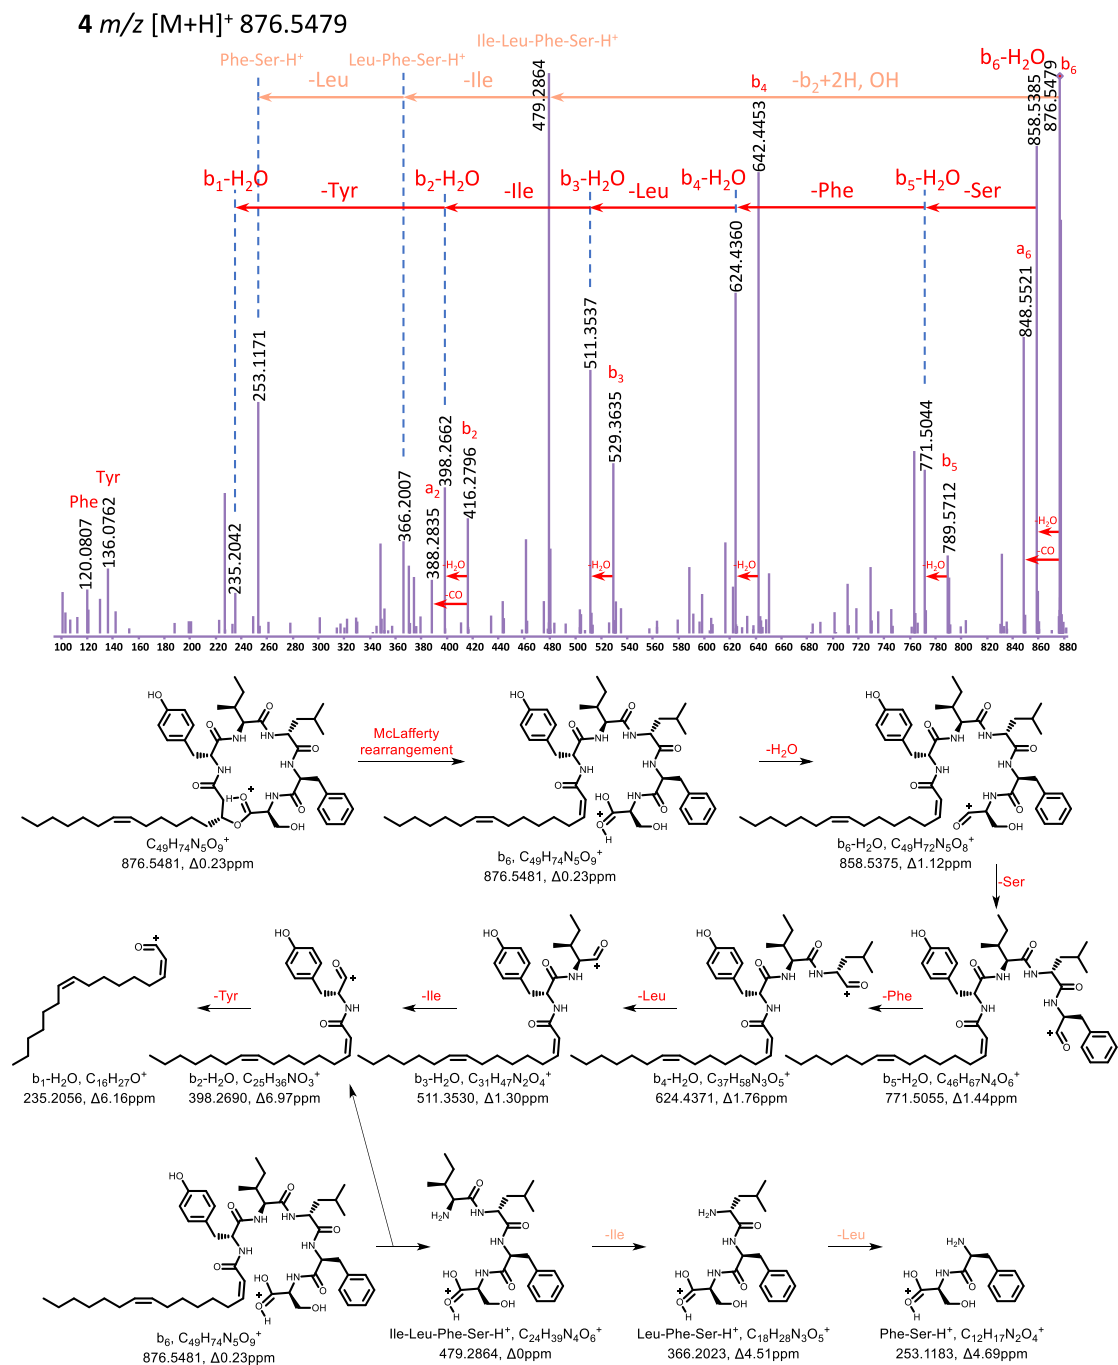

**Fig. S7** MS/MS spectra and fragmentation pathways with proposed fragment structures for **4**.

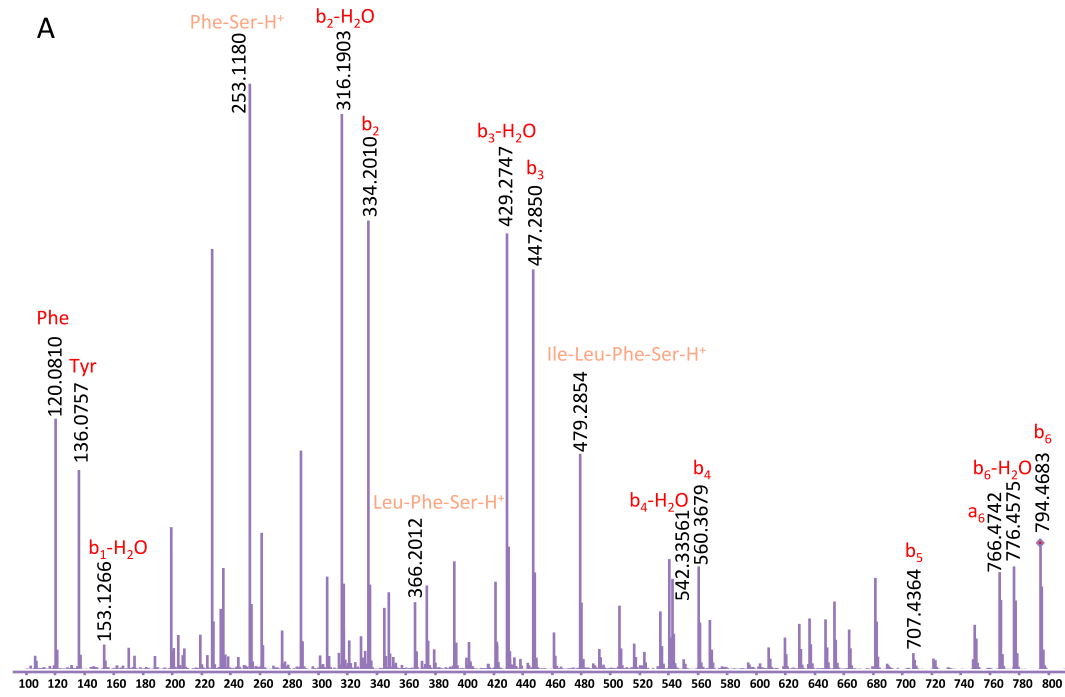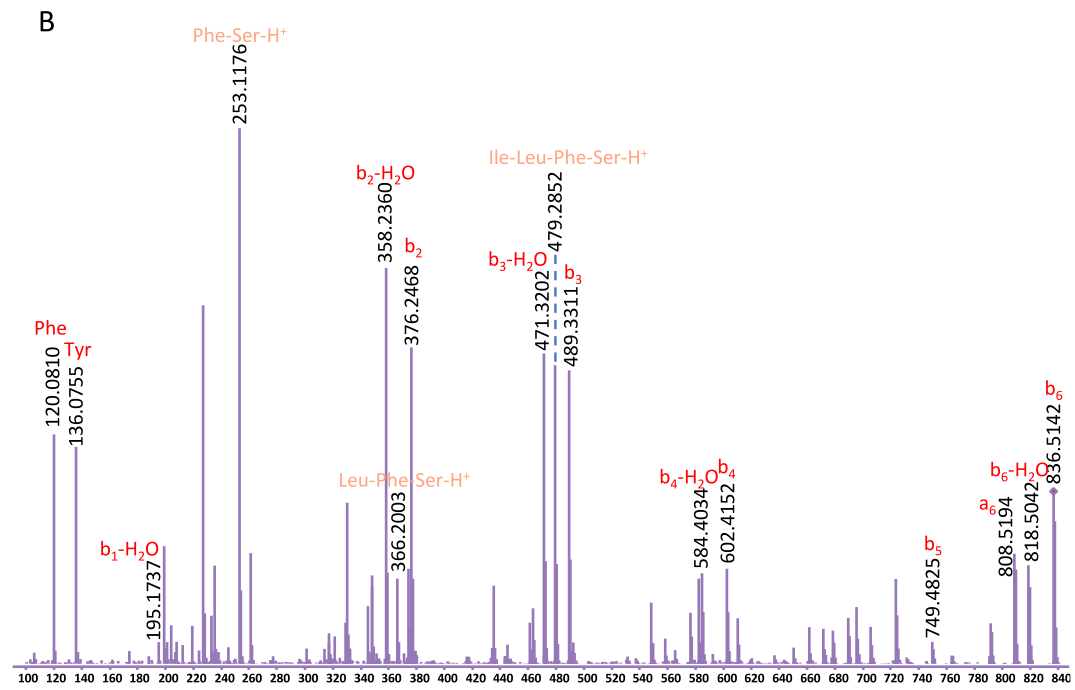



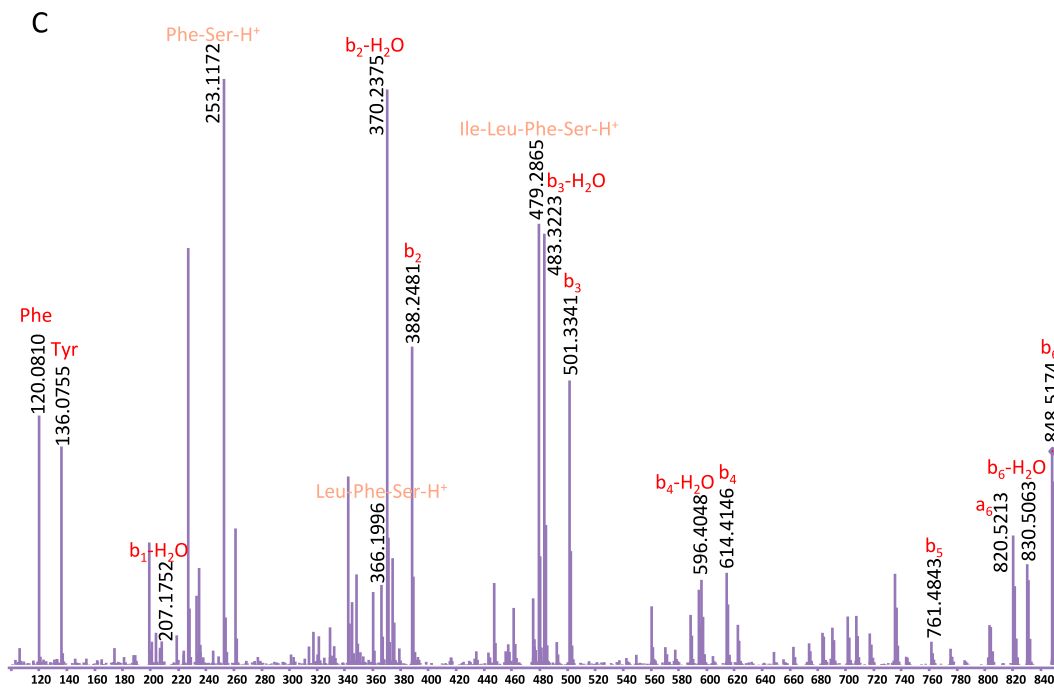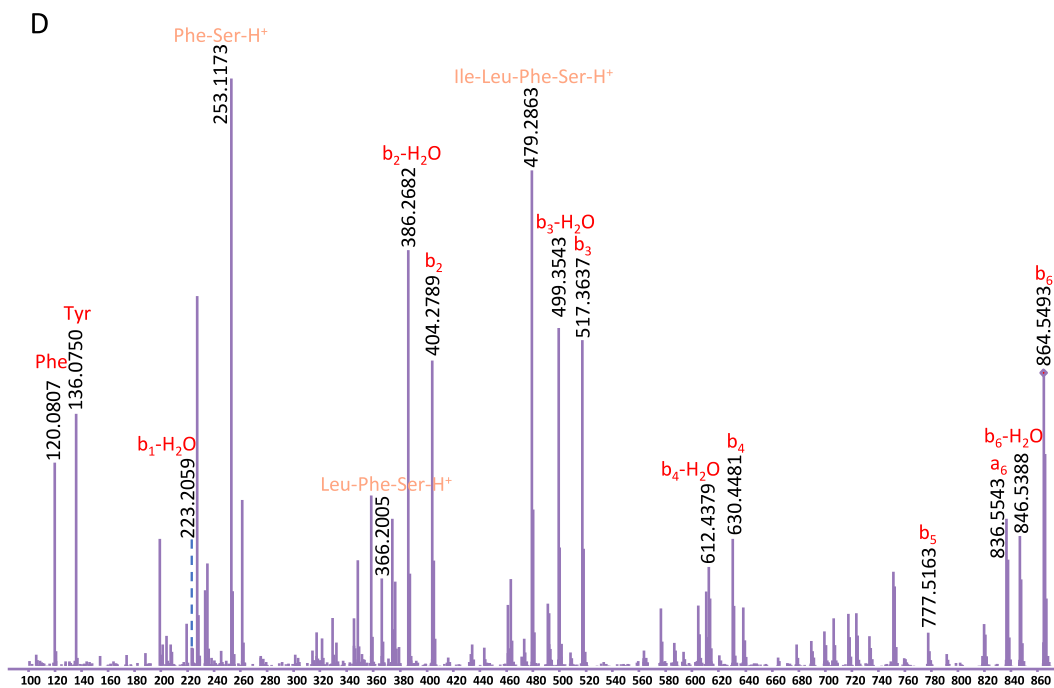

**Fig S8** We selected nodes from the molecular network with molecular weights of 794.471 (A), 836.517 (B), 848.517 (C), and 864.549 (D) for the analysis of their MS/MS spectra. This analysis reveals that these analogues share the same peptide core as sefopeptides A-D but exhibit variations only in the fatty acid chain.

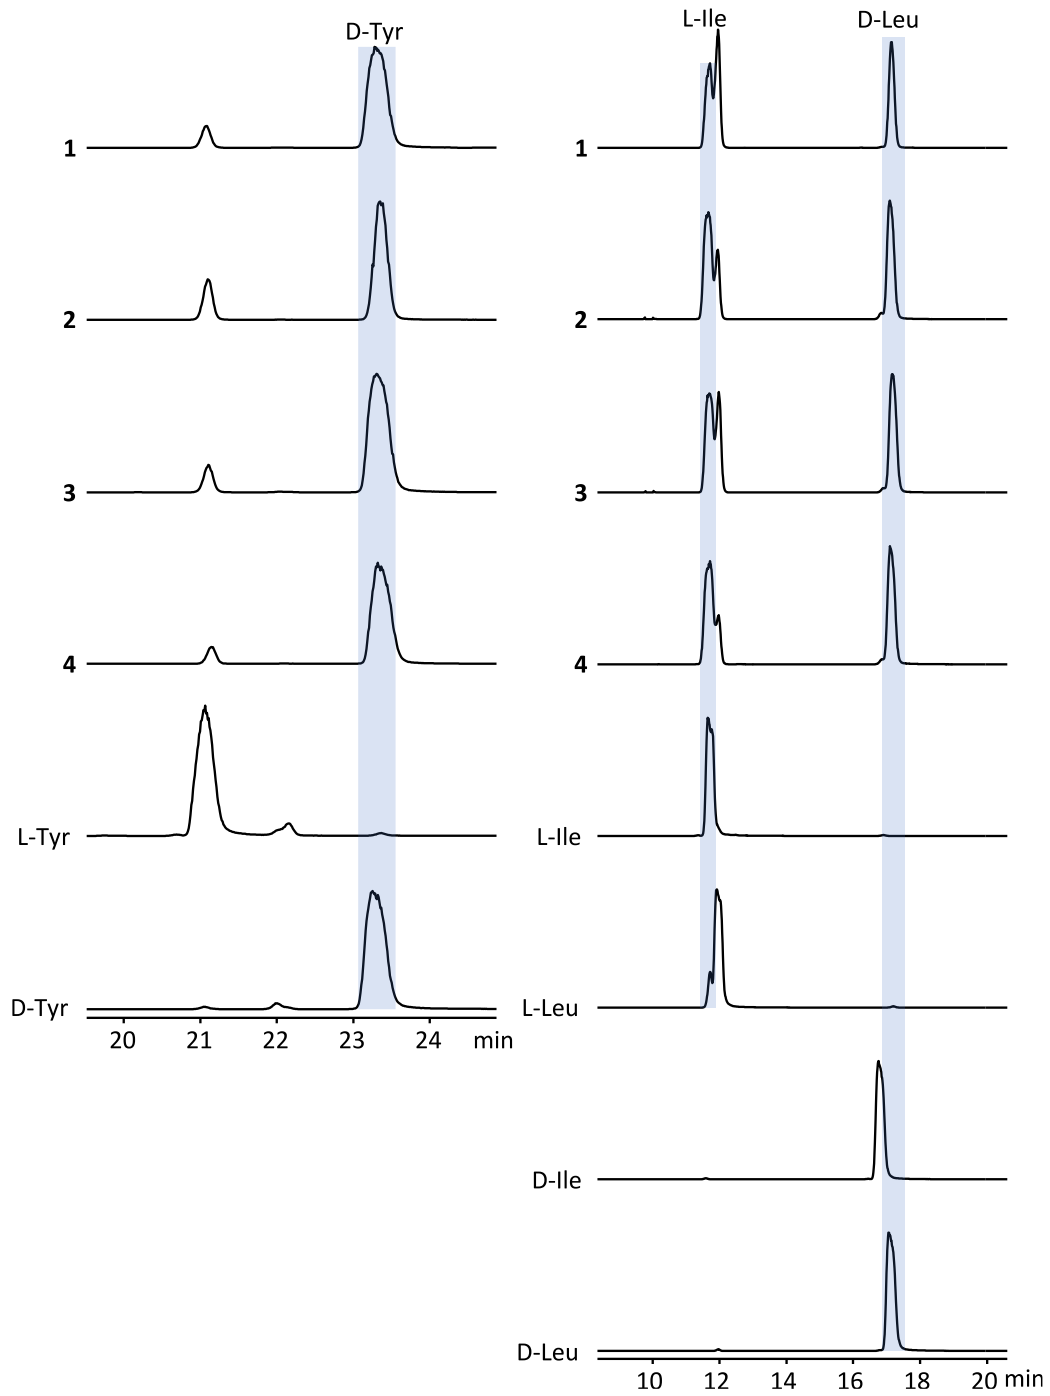

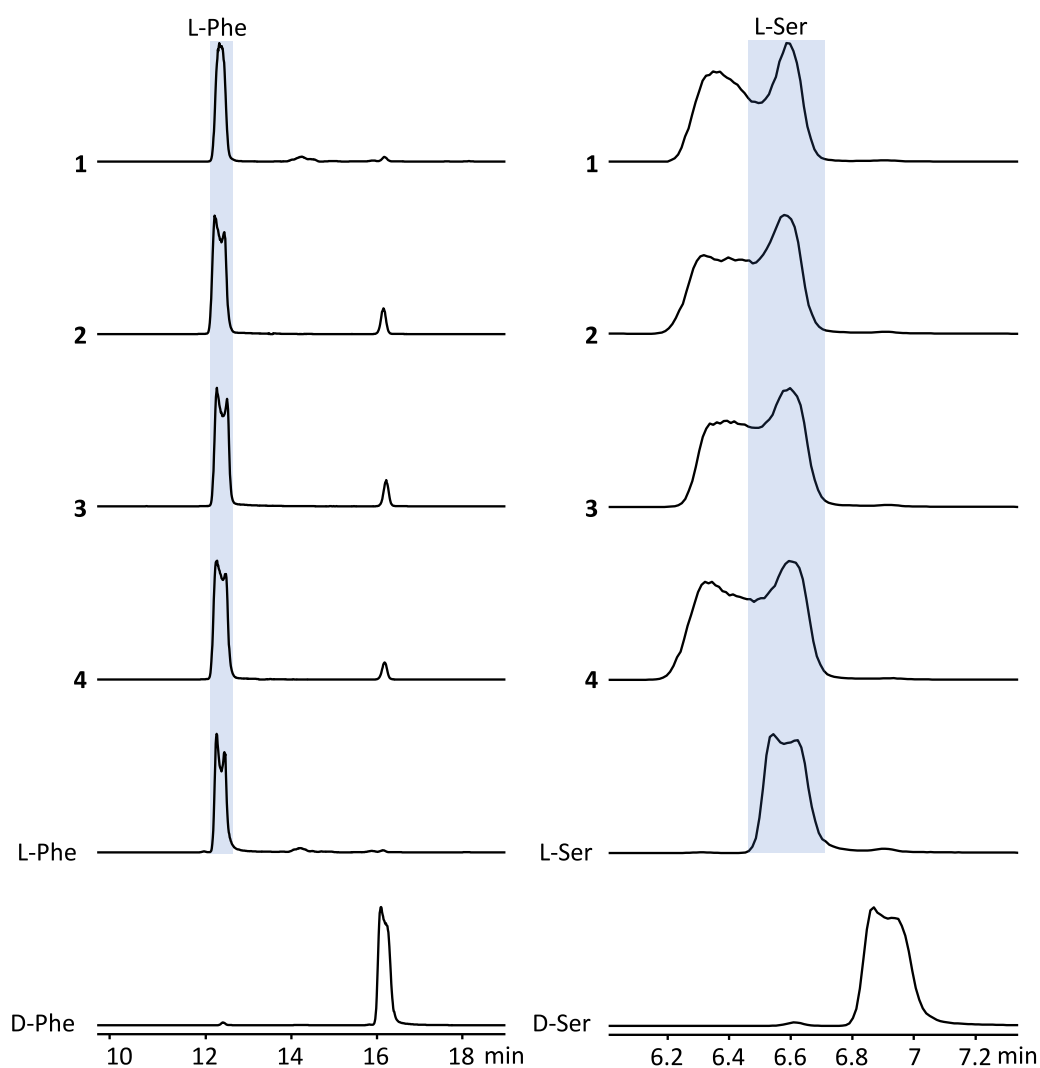

**Fig. S9** Configuration determination of amino acids in **1-4** using the Marfey's method. HPLC-MS analysis of hydrolyzed **1-4** and amino acid standards derivatized with L-FDLA. Depicted are EIC traces for Tyrosine (Tyr,  $m/z$  770  $[M + H]^+$ , di-substituted Marfey's derivatives<sup>3</sup>), isoleucine (Ile,  $m/z$  426  $[M + H]^+$ ), leucine (Leu,  $m/z$  426  $[M + H]^+$ ), phenylalanine (Phe,  $m/z$  460  $[M + H]^+$ ), and serine (Ser,  $m/z$  400  $[M + H]^+$ ). A minor peak of L-Leu is likely due to racemization of D-Leu during acid hydrolysis<sup>4</sup>.

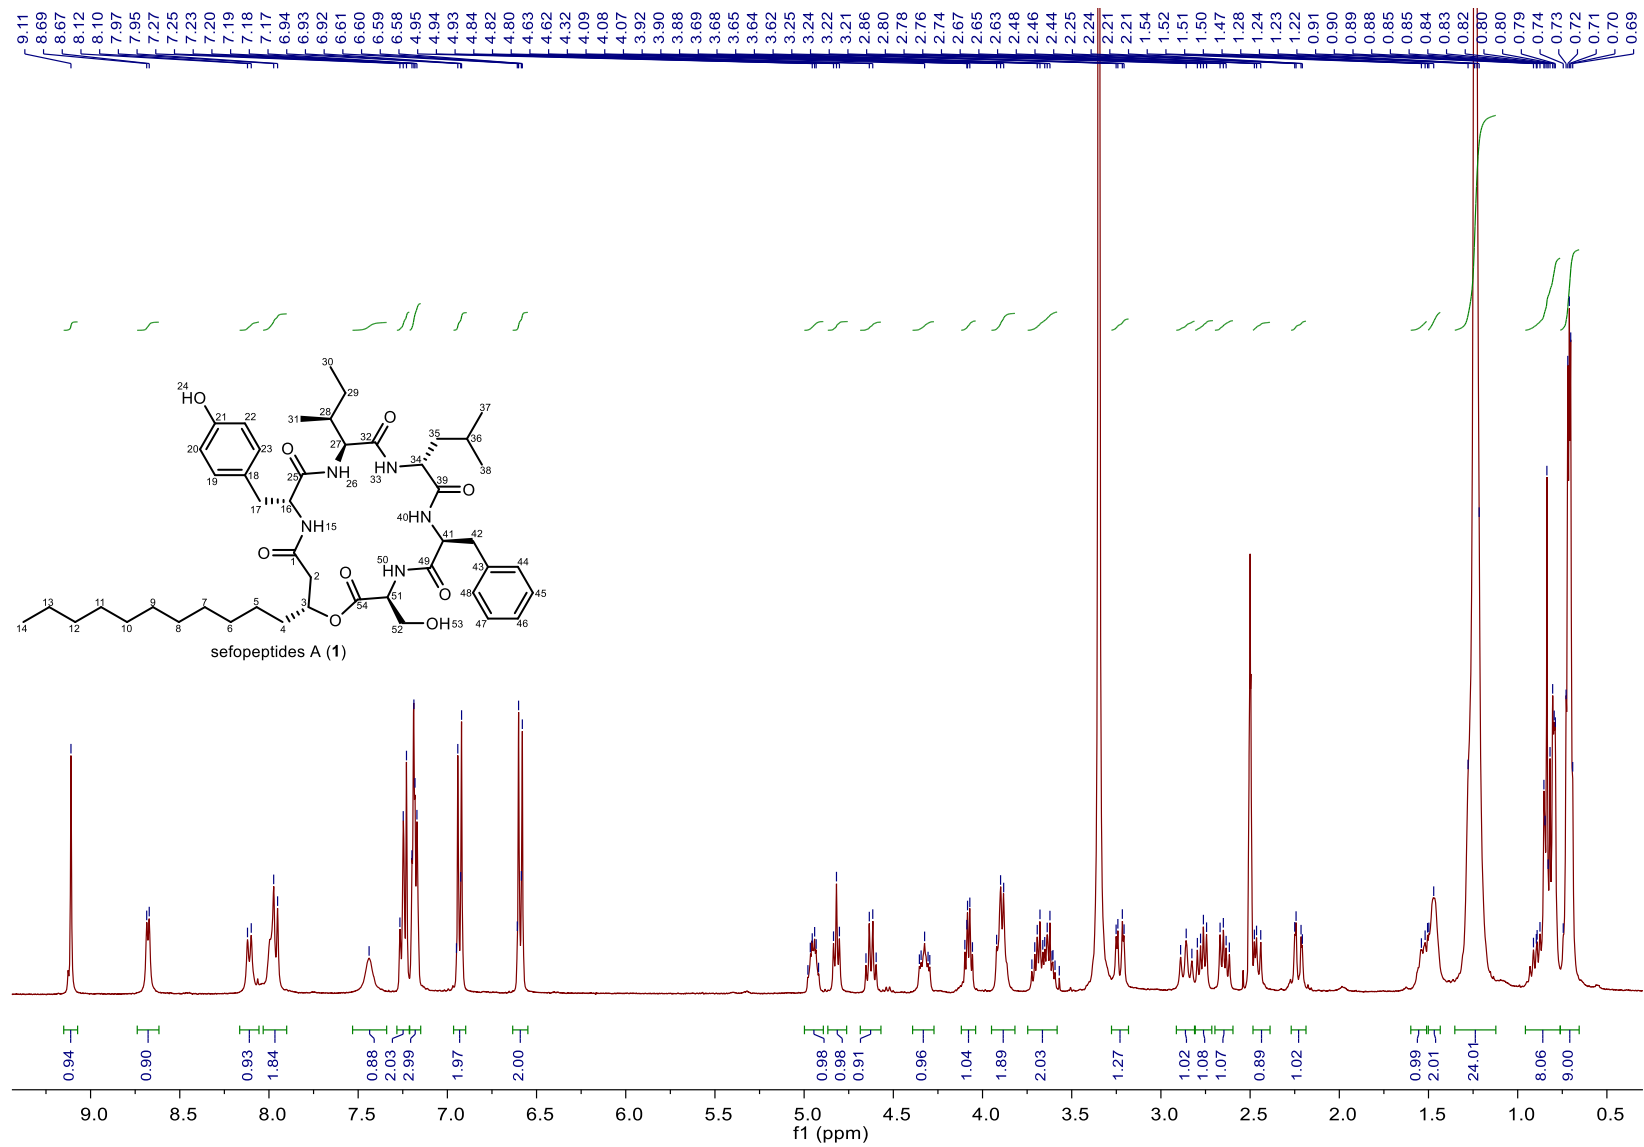

Fig. S10 <sup>1</sup>H NMR (400 MHz, DMSO-*d*<sub>6</sub>) spectrum of sefopeptides A (**1**).

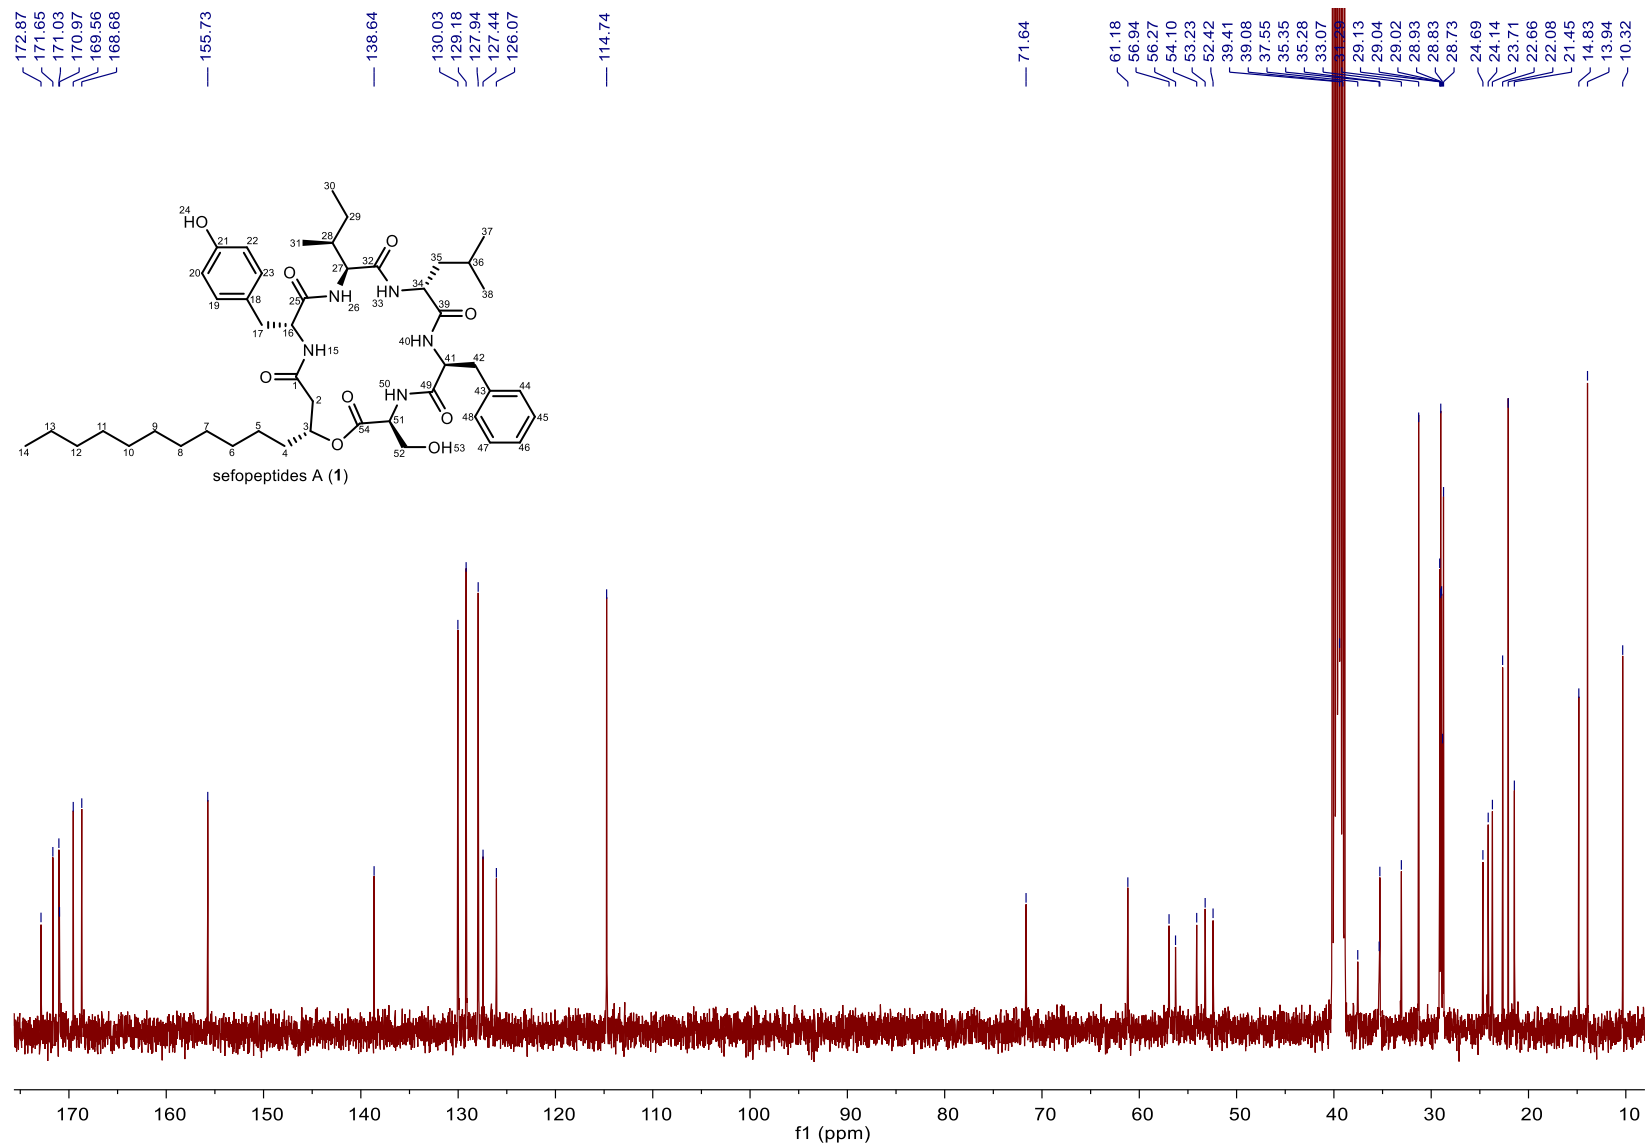

Fig. S11 <sup>13</sup>C NMR (100 MHz, DMSO-d<sub>6</sub>) spectrum of sefopeptides A (1).

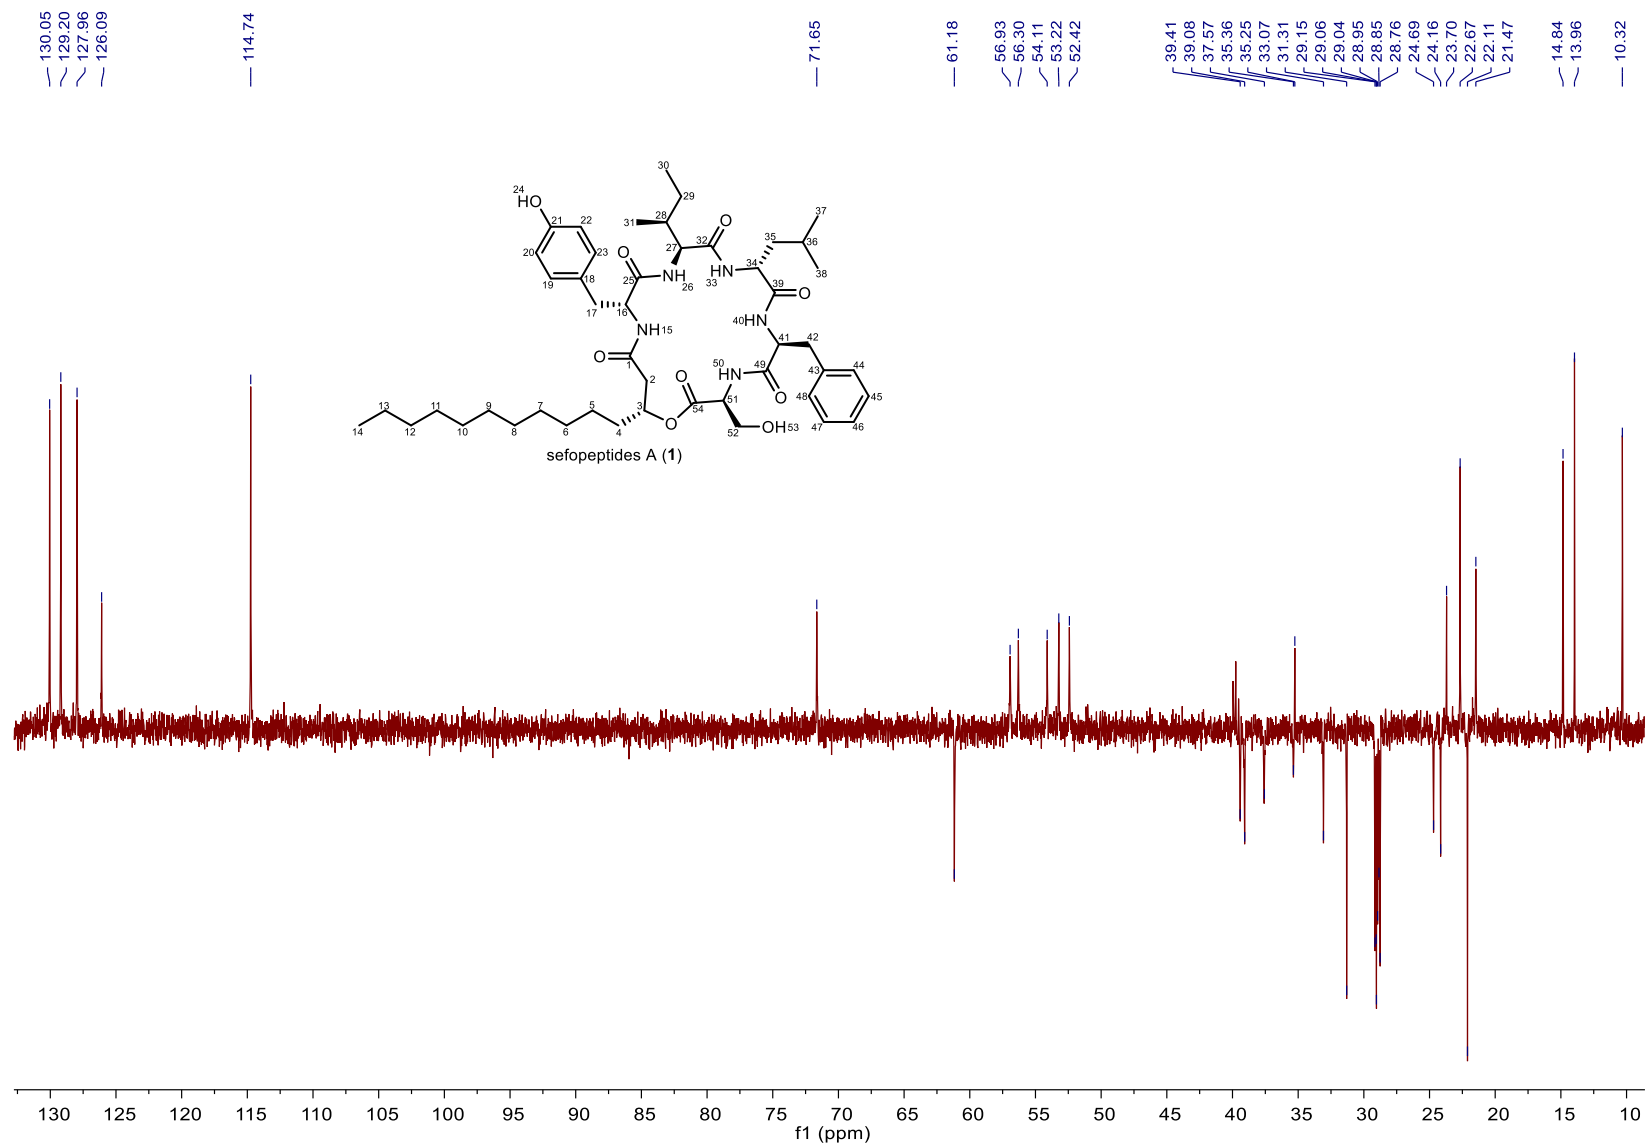

Fig. S12 DEPT-135 (100 MHz, DMSO- $d_6$ ) spectrum of sefopeptides A (1).

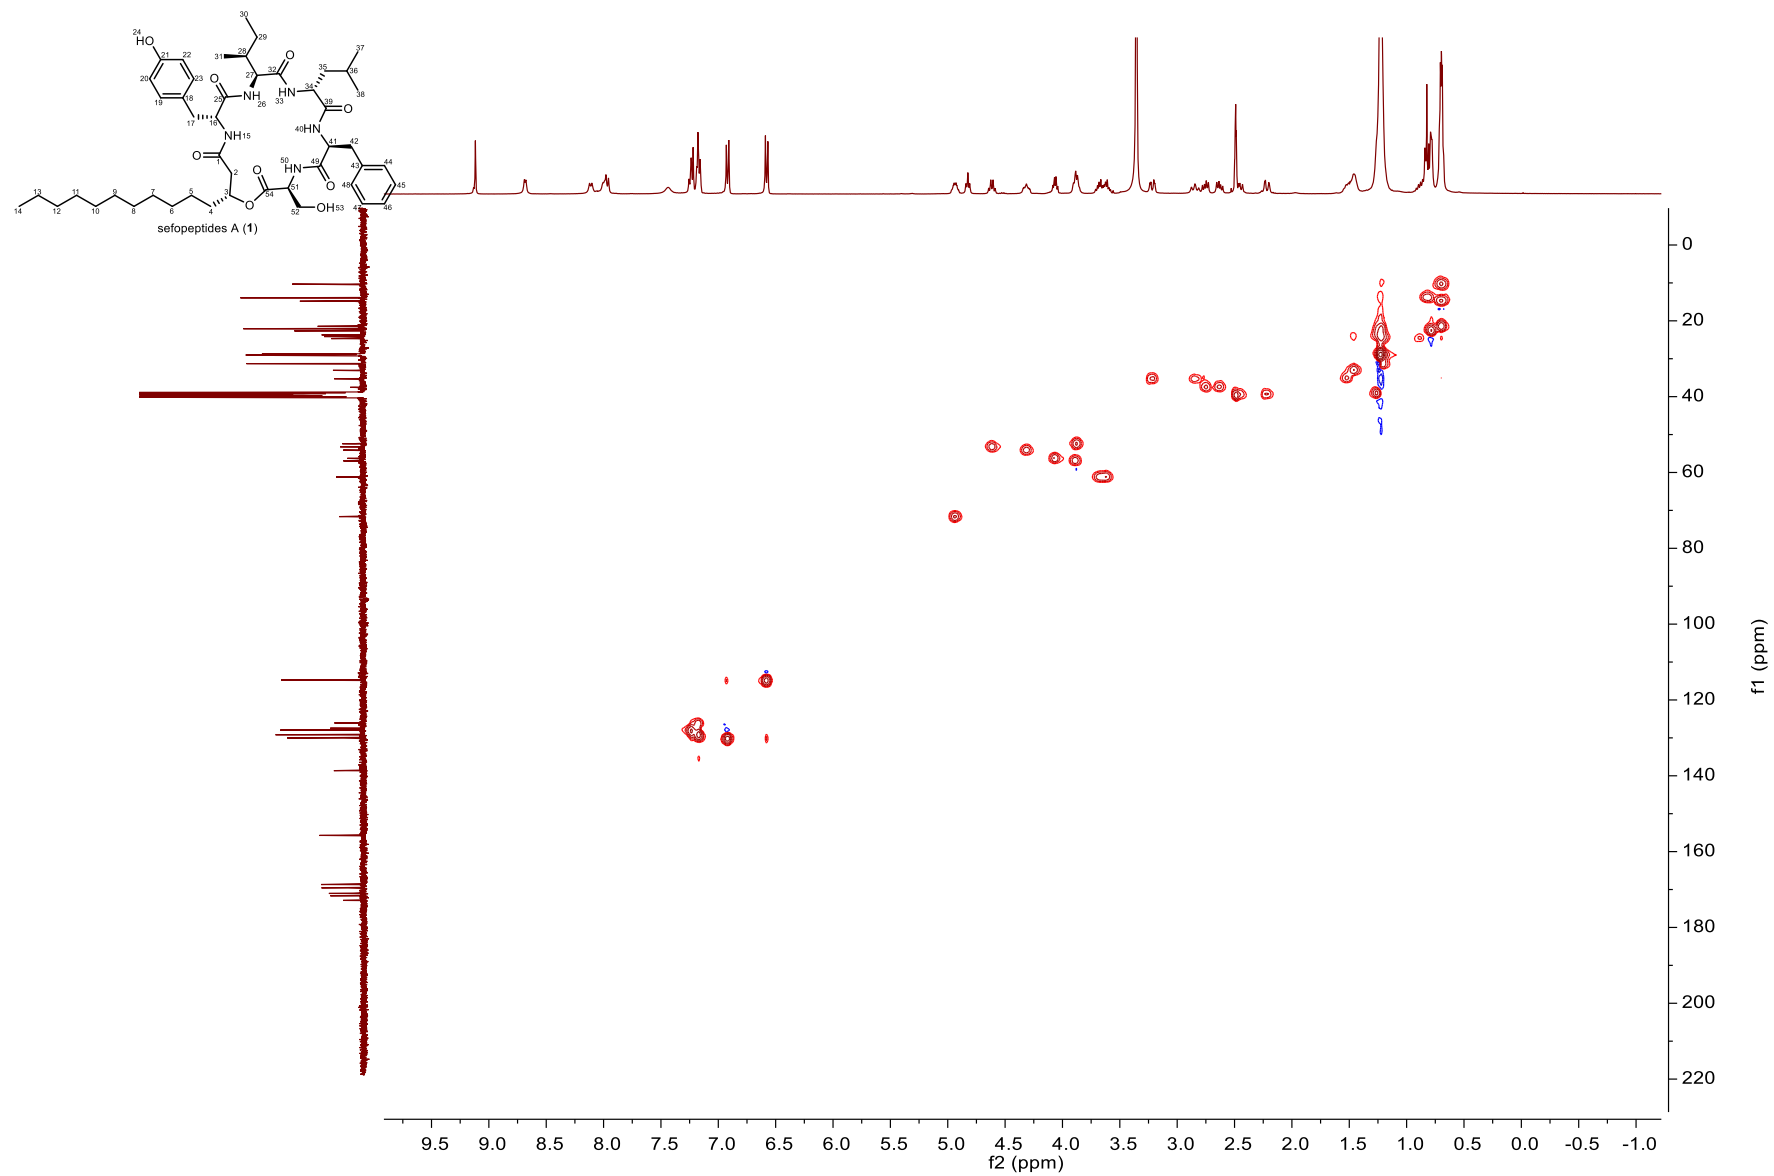

Fig. S13 HSQC (DMSO-*d*<sub>6</sub>) spectrum of sefopeptides A (1).

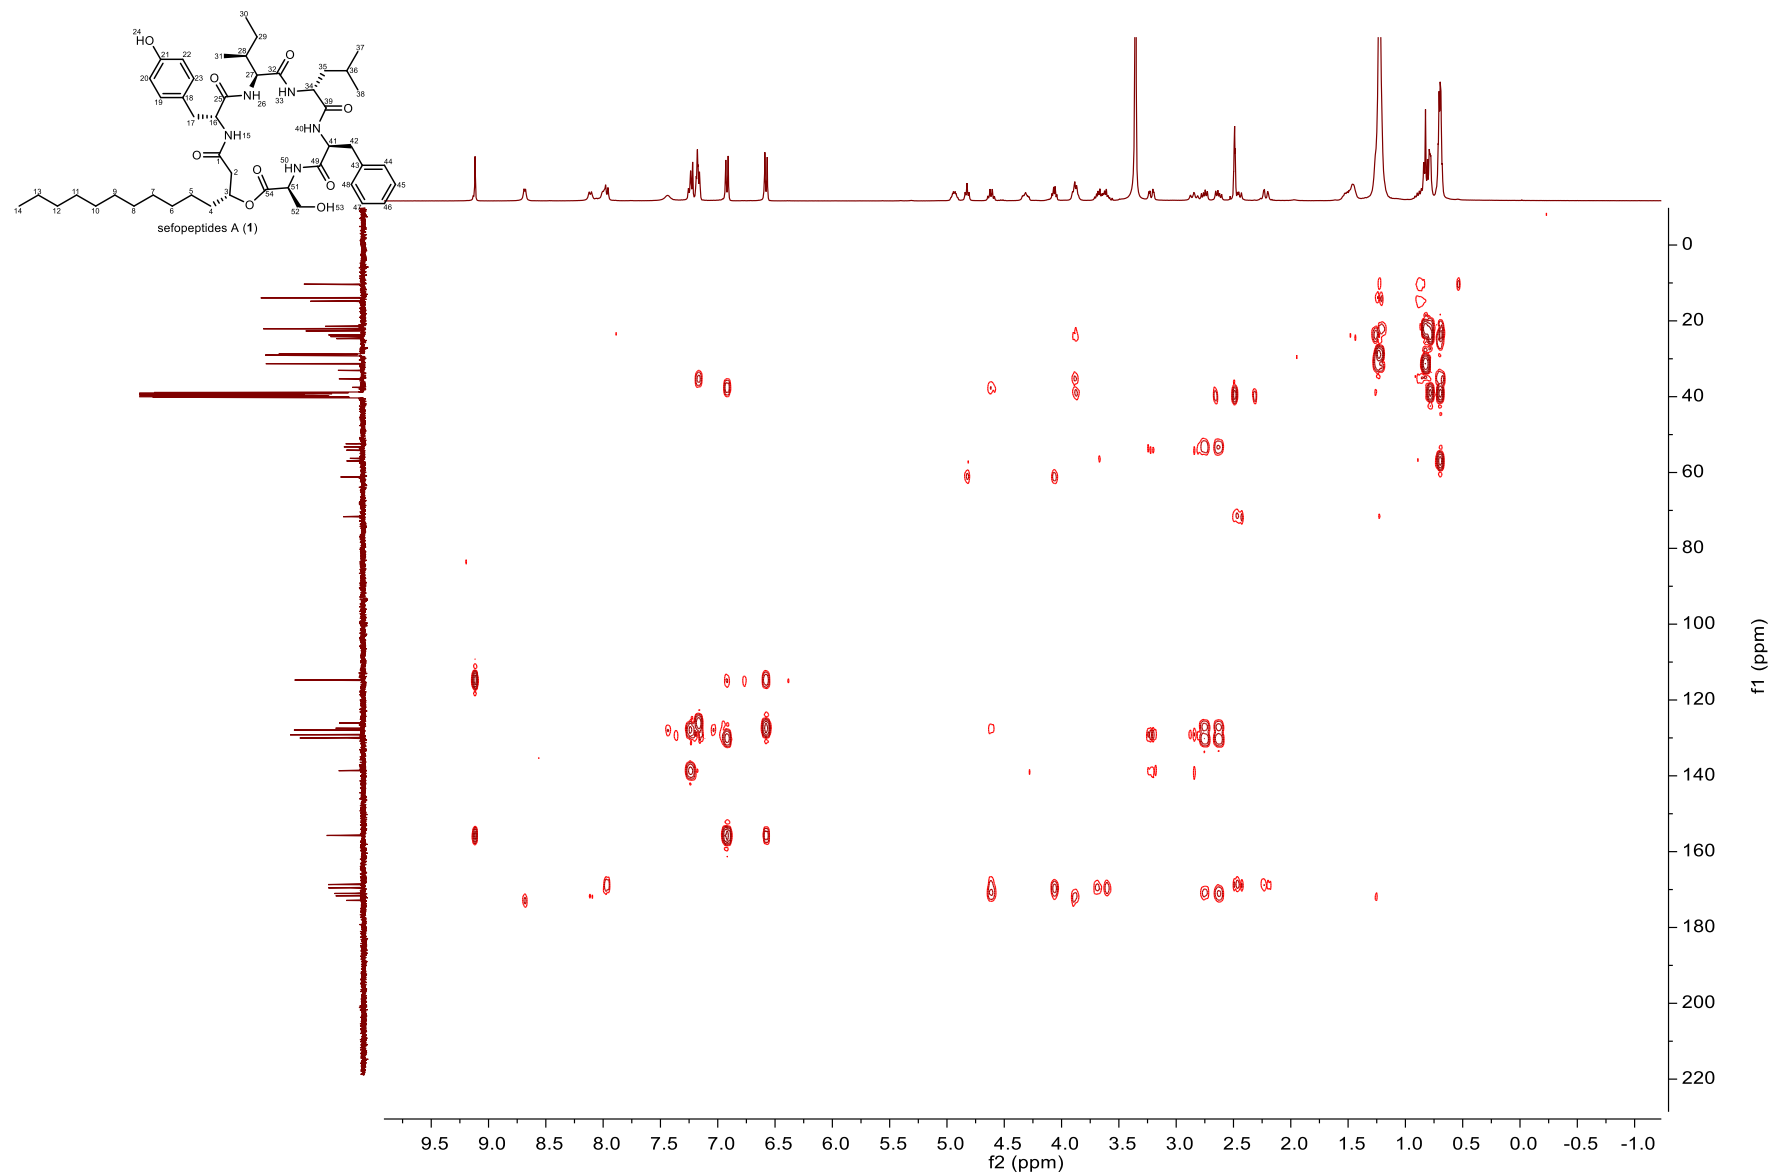

Fig. S14  $^1\text{H}$ - $^{13}\text{C}$  HMBC (DMSO- $d_6$ ) spectrum of sefopeptides A (1).



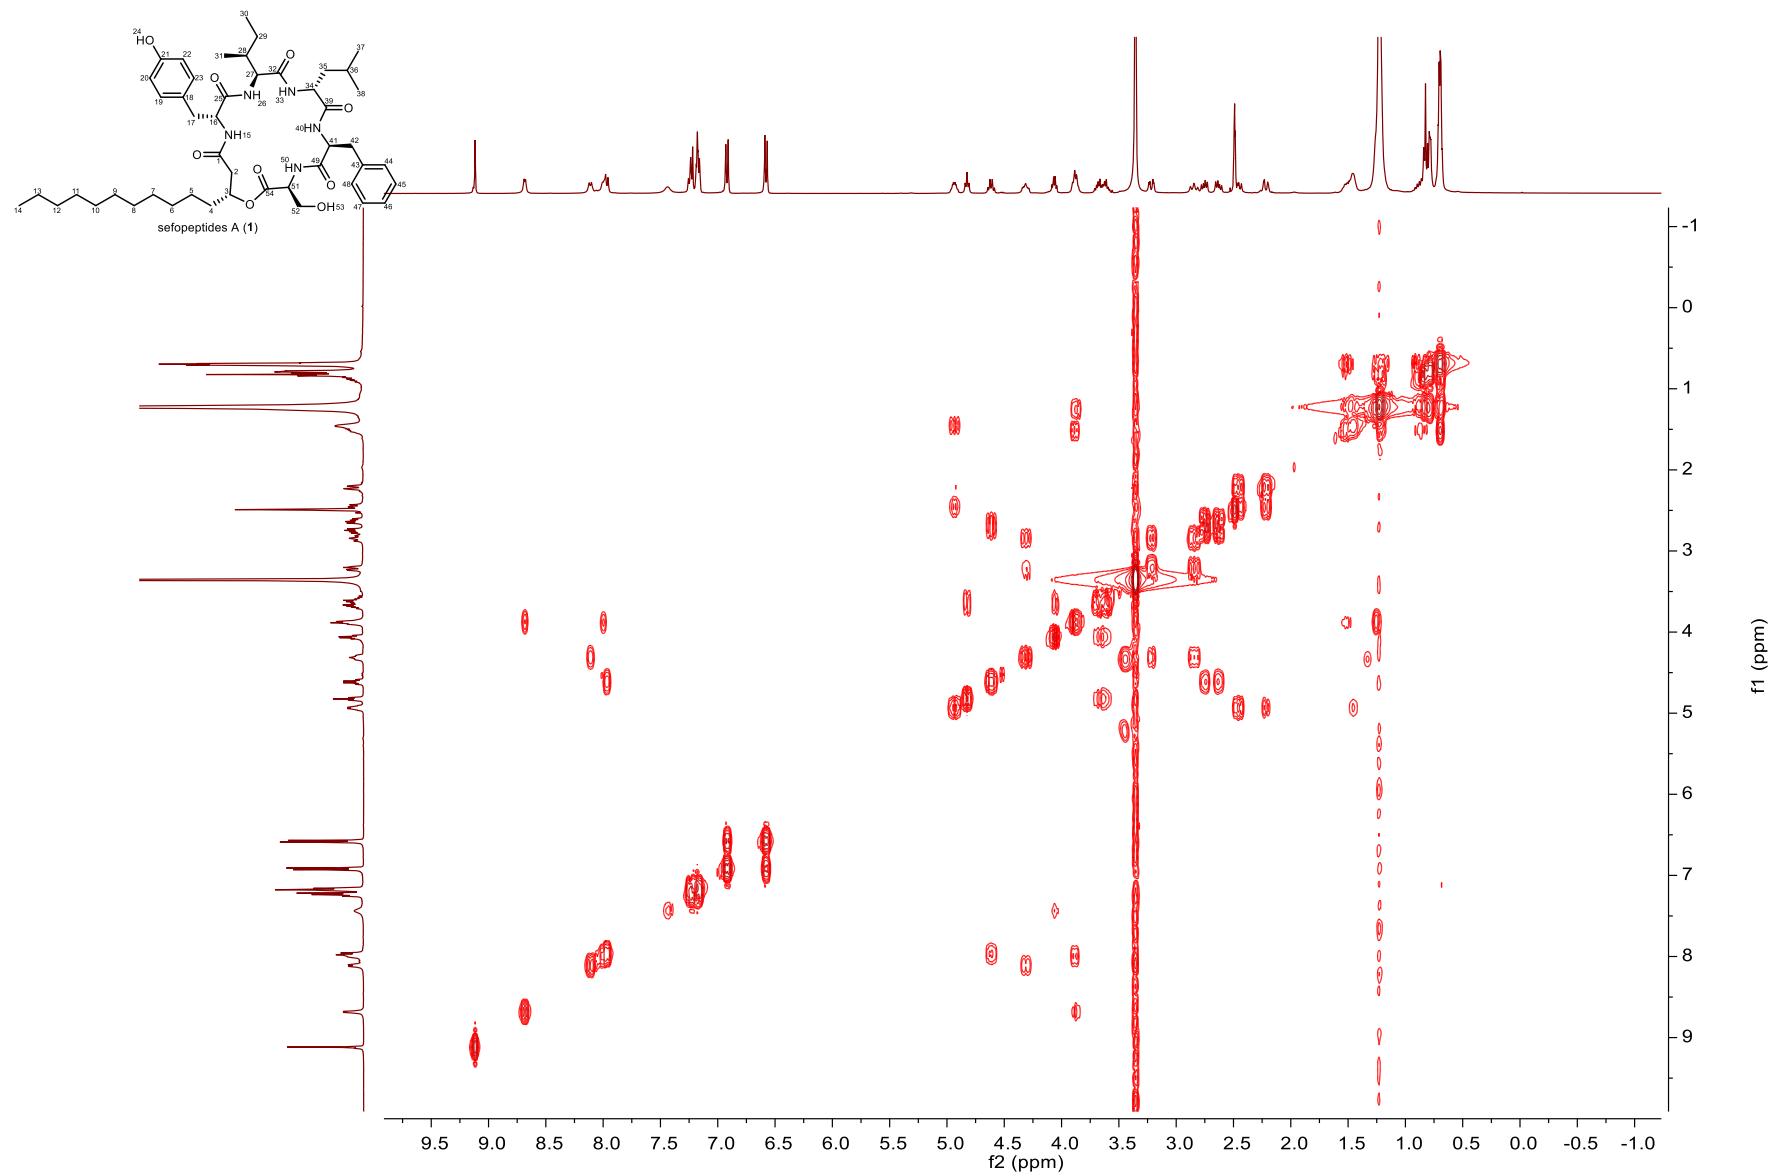

Fig. S15  $^1\text{H}$ - $^1\text{H}$  COSY (DMSO- $d_6$ ) spectrum of sefopeptides A (1).

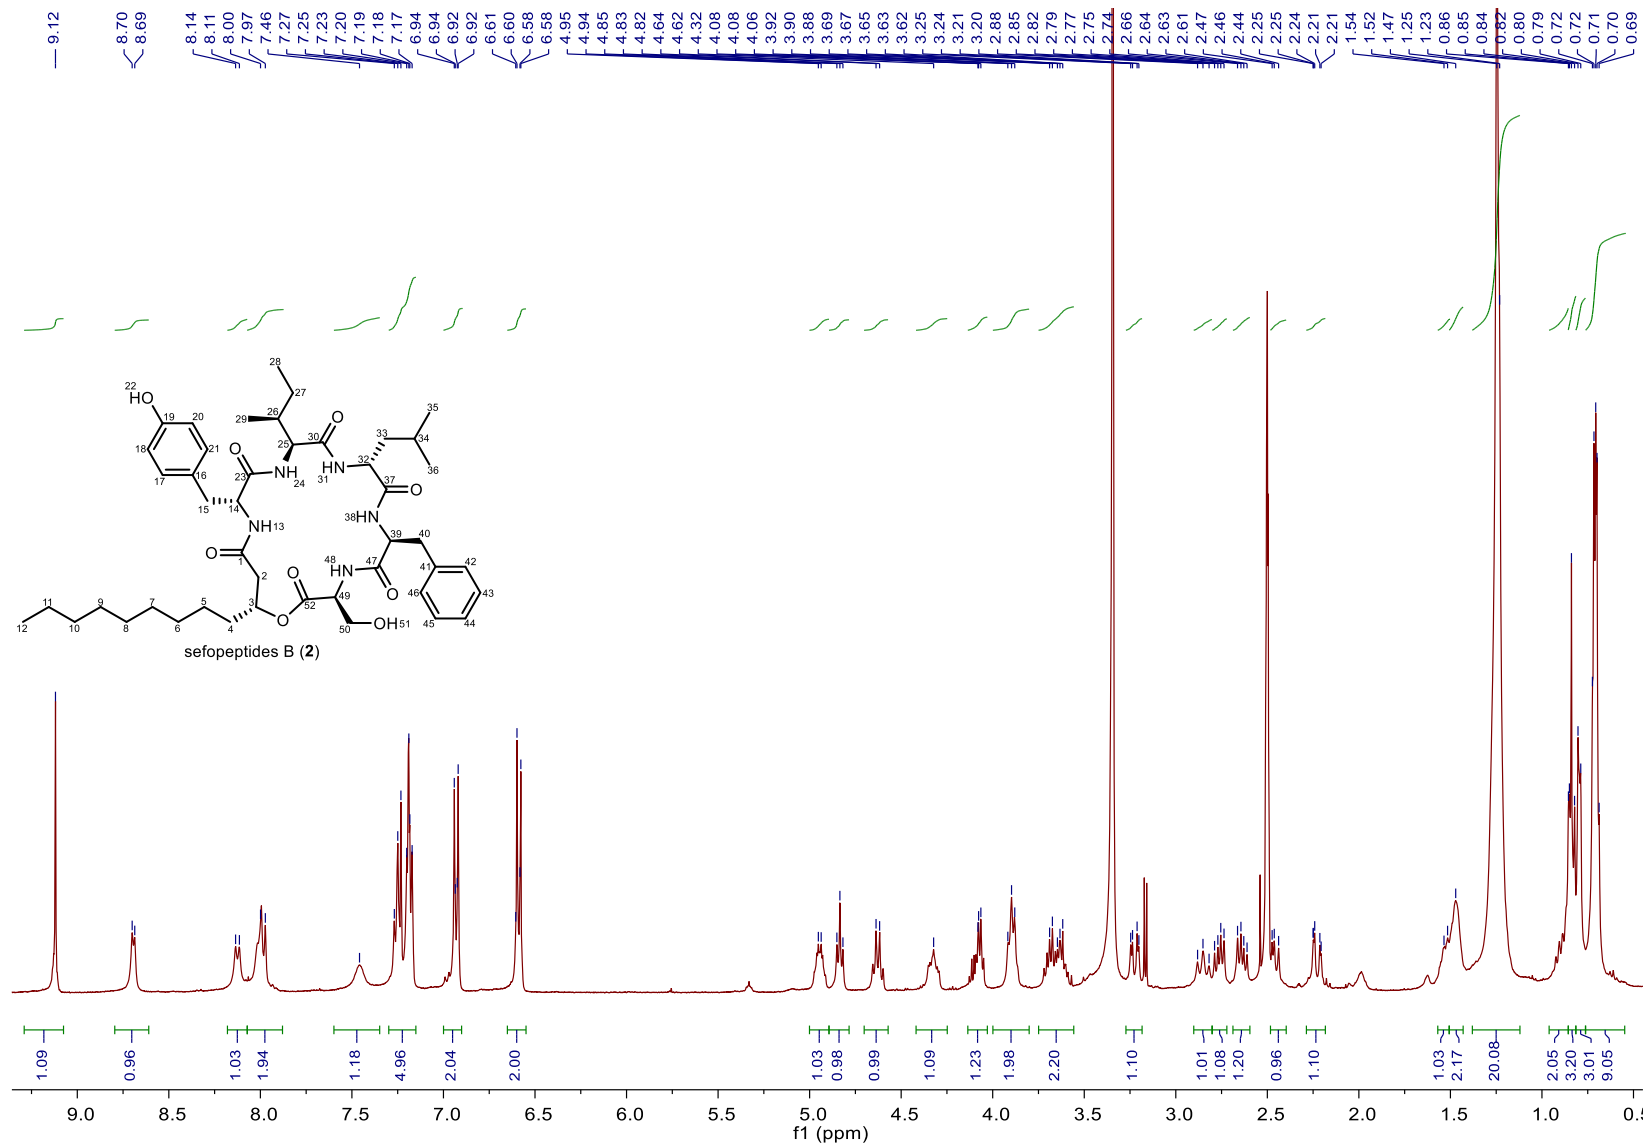

Fig. S16  $^1\text{H}$  NMR (400 MHz,  $\text{DMSO-}d_6$ ) spectrum of sefopeptides B (2).

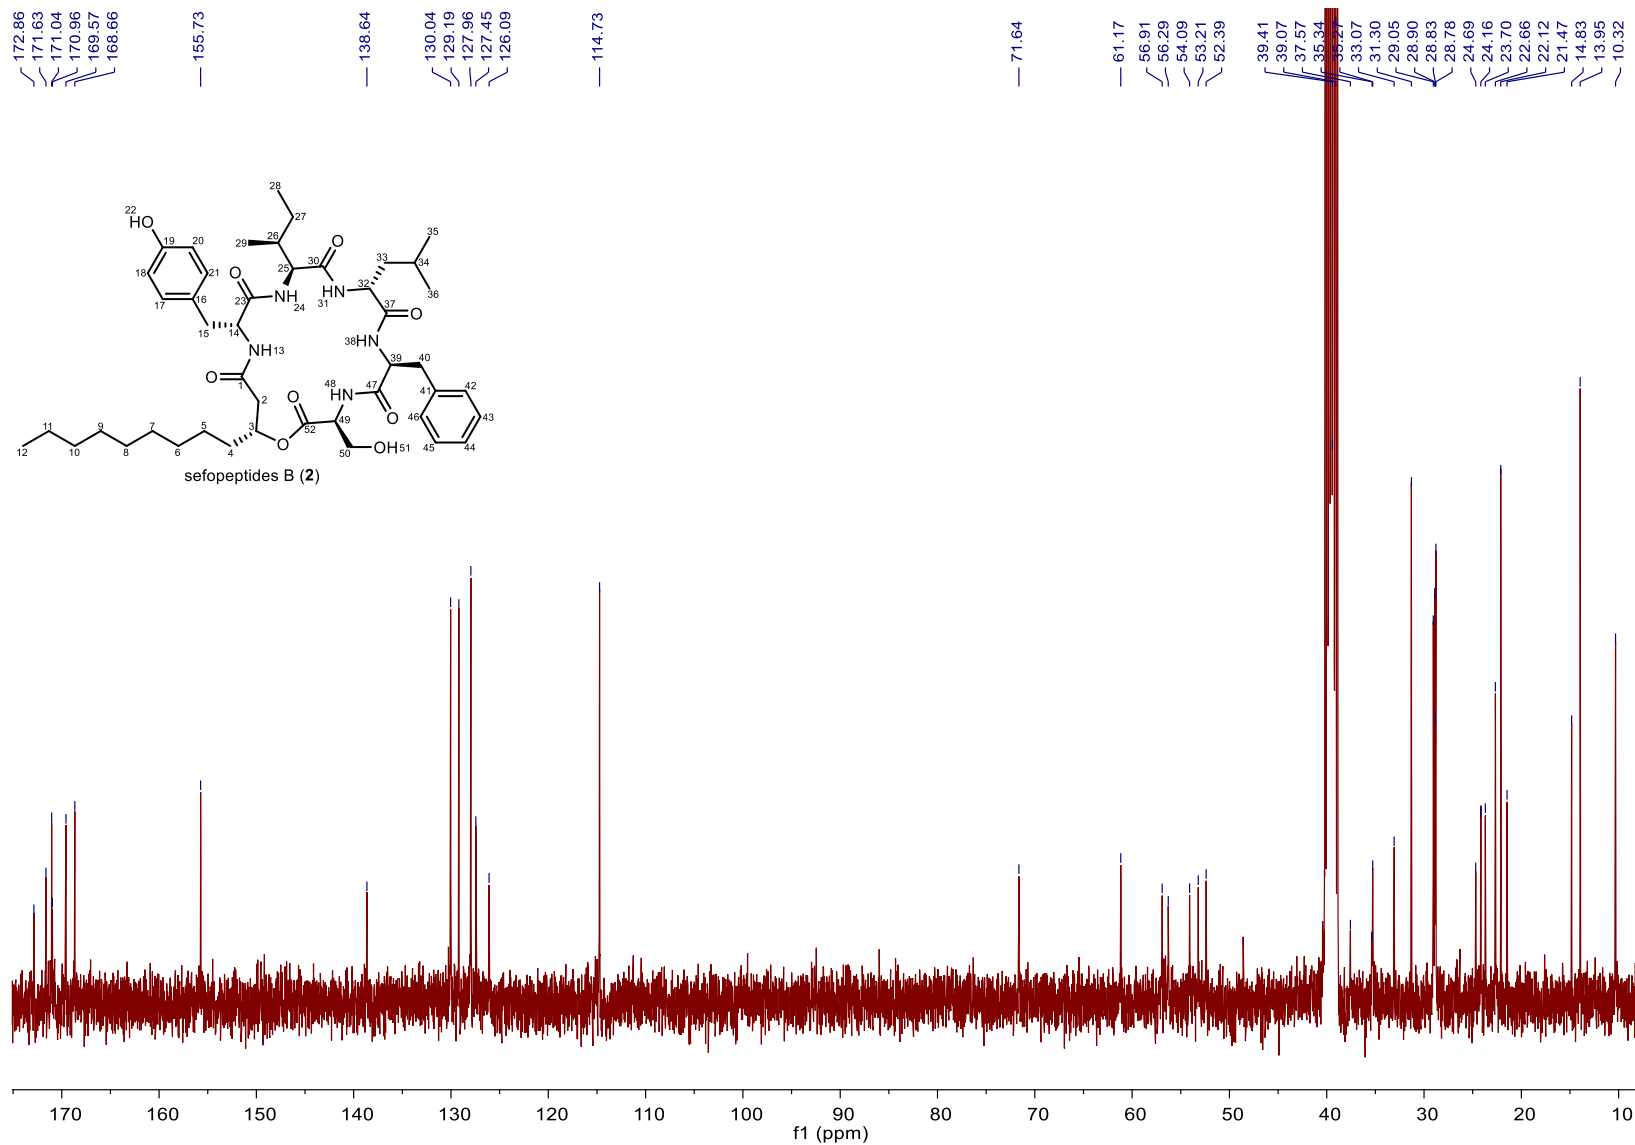

Fig. S17 <sup>13</sup>C NMR (100 MHz, DMSO-d<sub>6</sub>) spectrum of sefopeptides B (2).

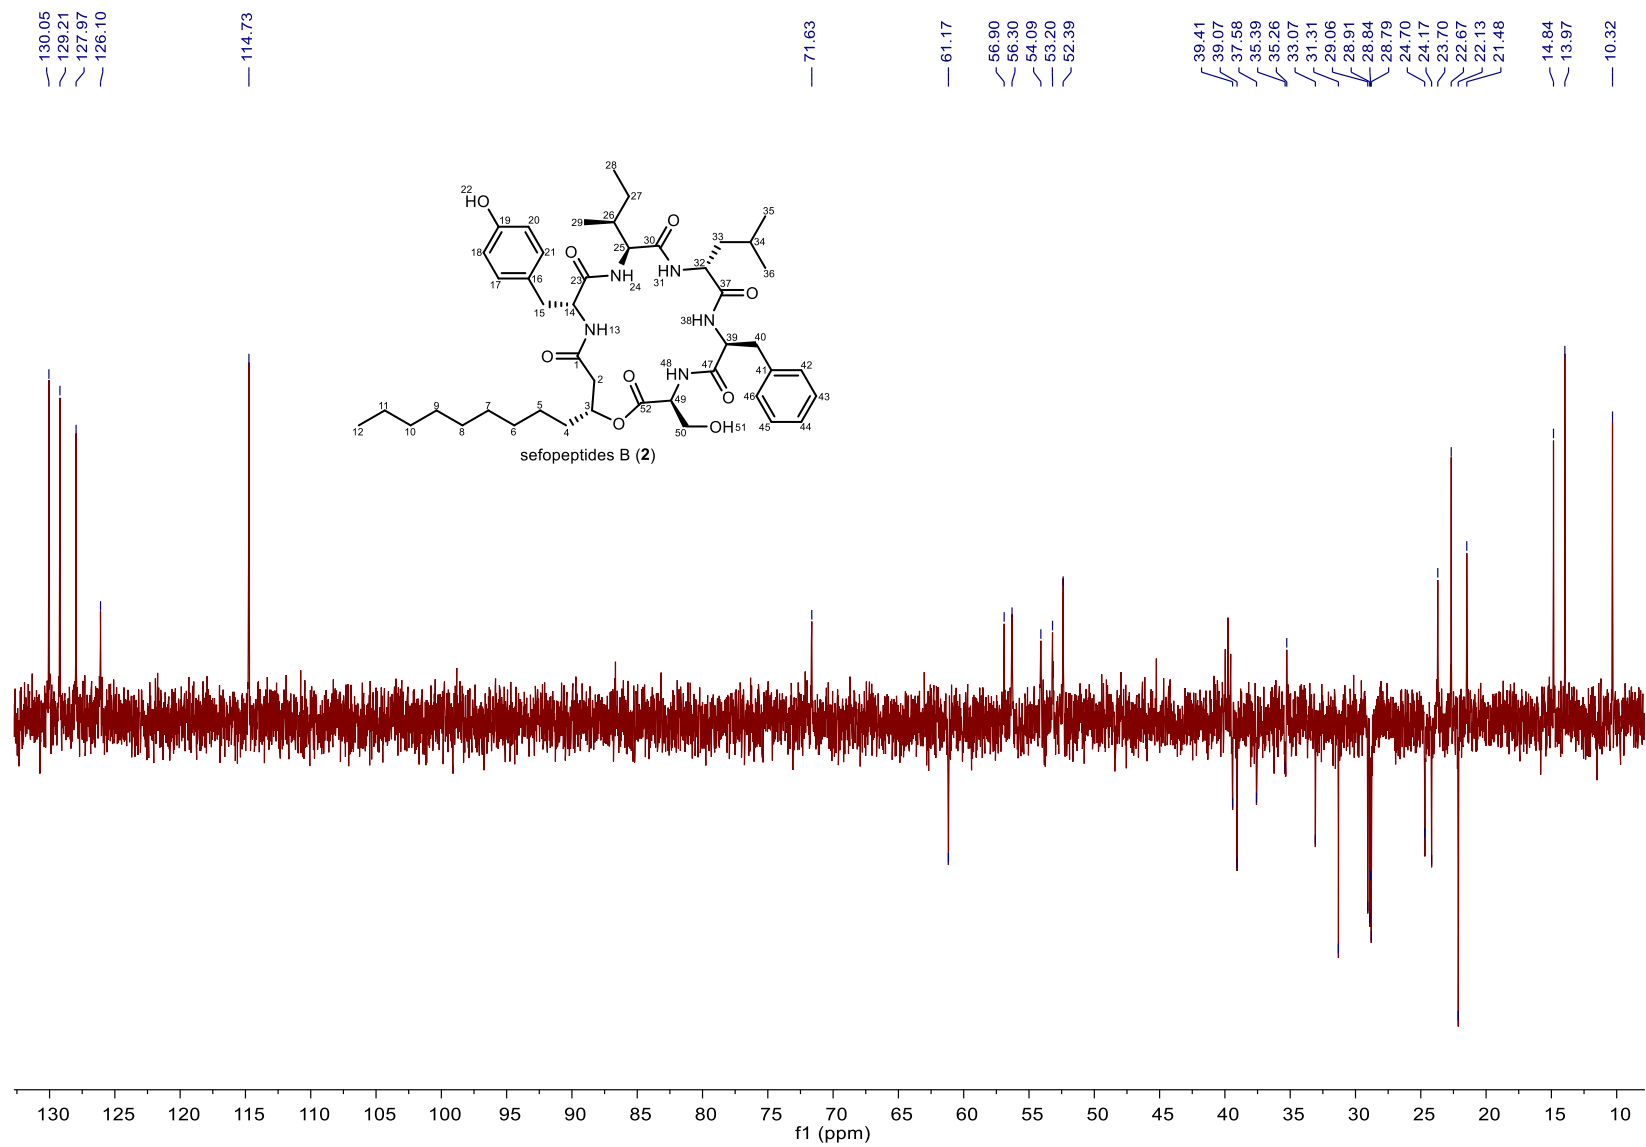

Fig. S18 DEPT-135 (100 MHz, DMSO-d<sub>6</sub>) spectrum of sefopeptides B (2).

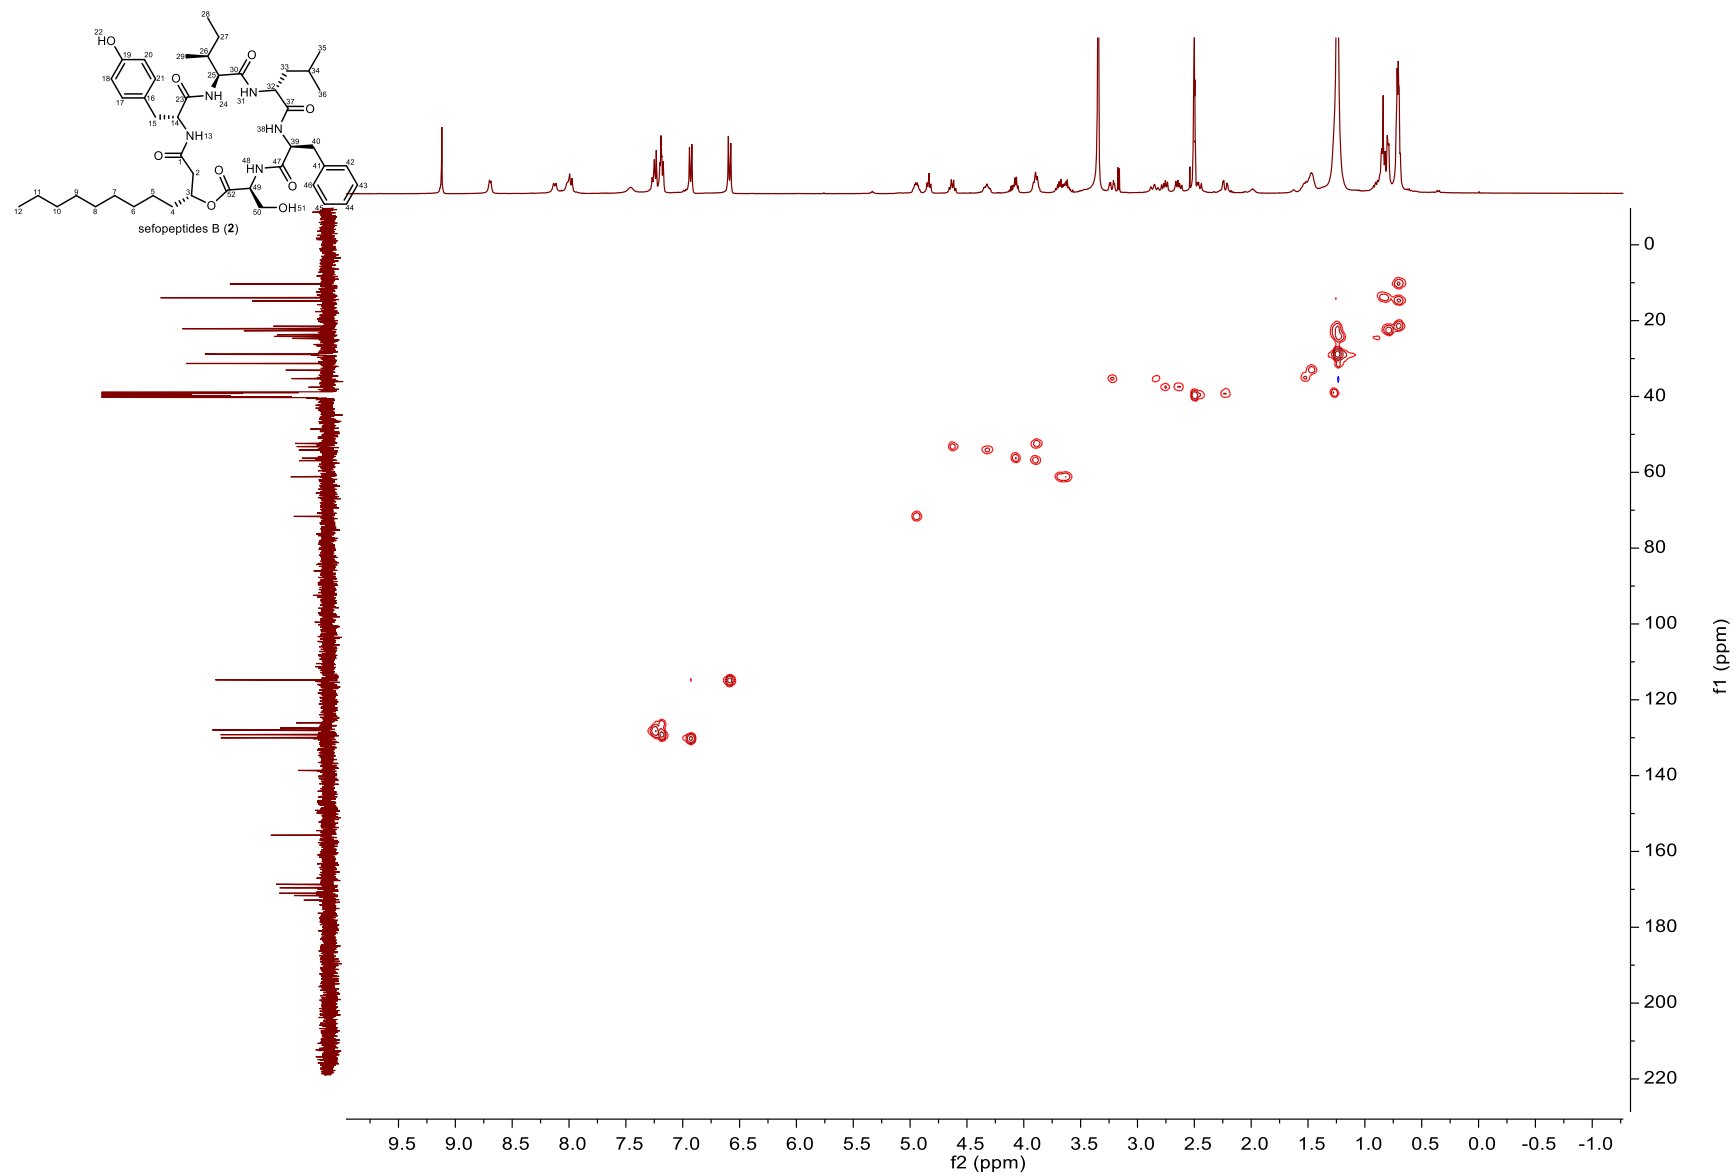

Fig. S19 HSQC (DMSO- $d_6$ ) spectrum of sefopeptides B (2).

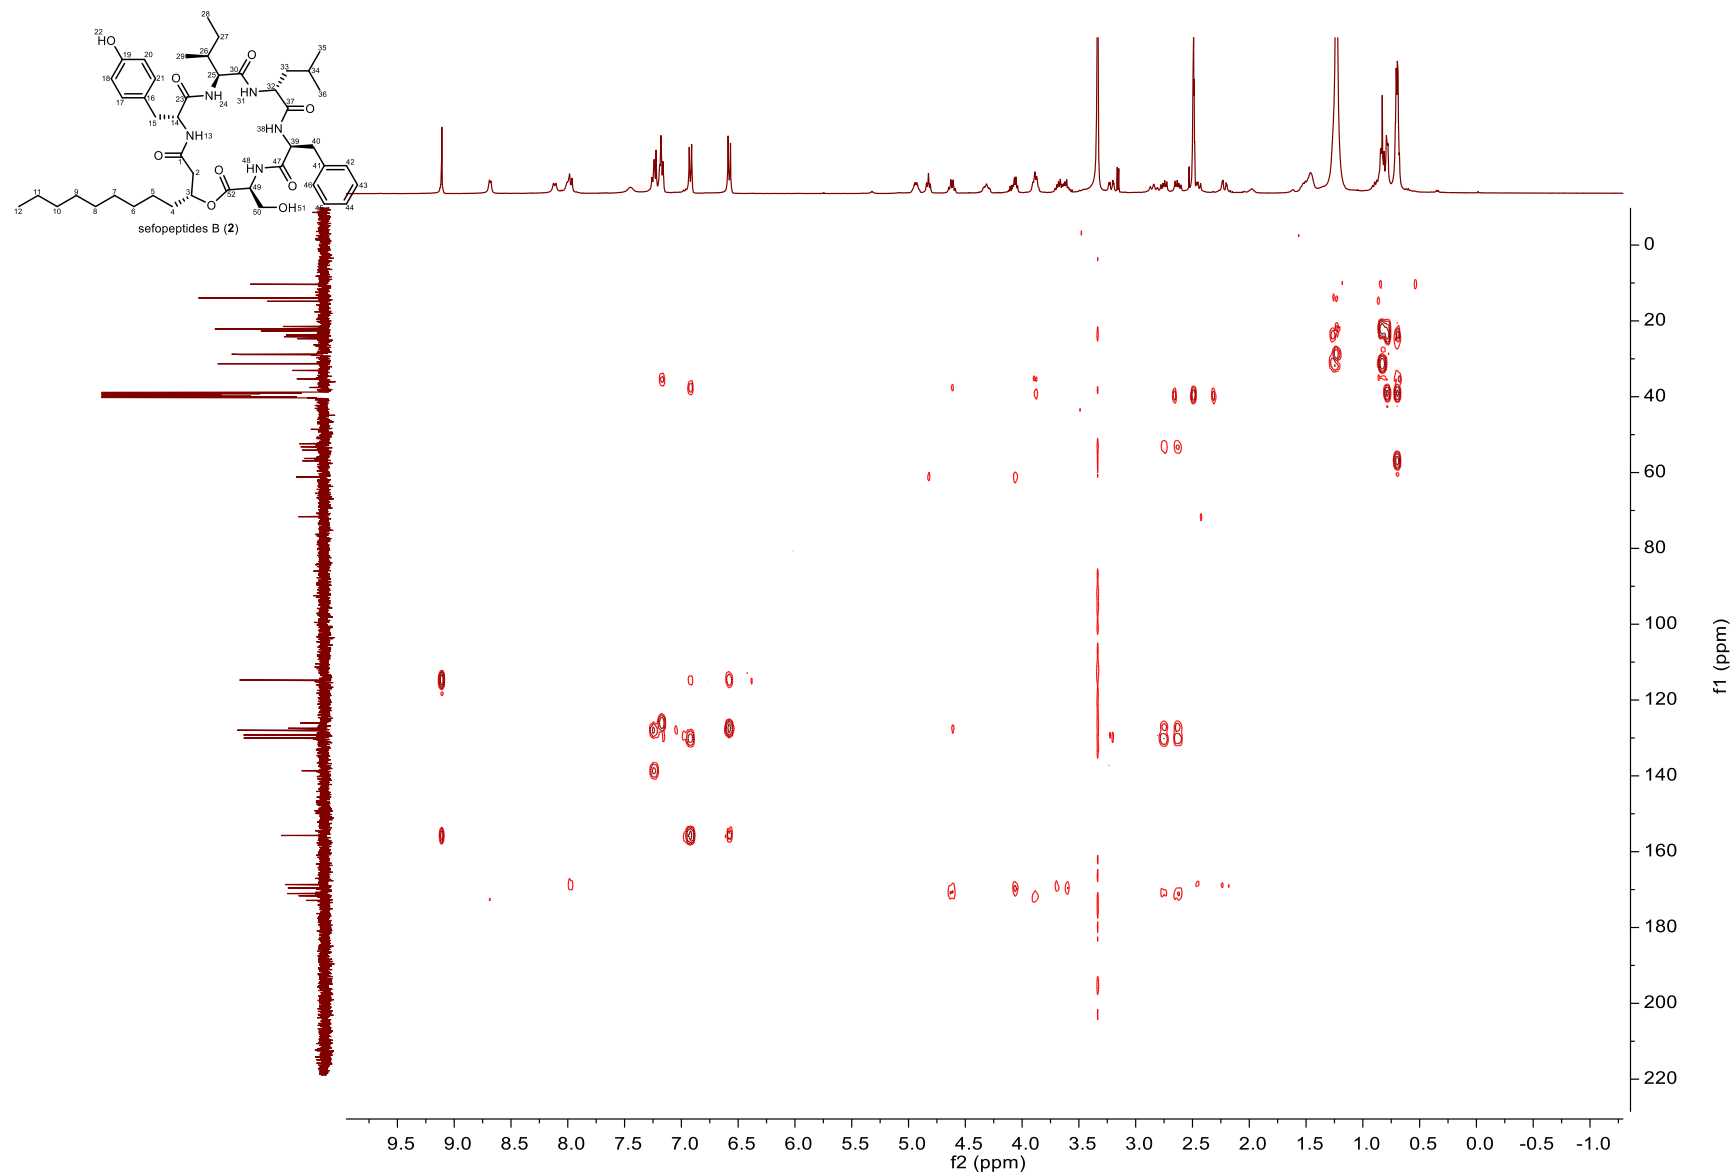

Fig. S20  $^1\text{H}$ - $^{13}\text{C}$  HMBC ( $\text{DMSO-}d_6$ ) spectrum of sefopeptides B (2).

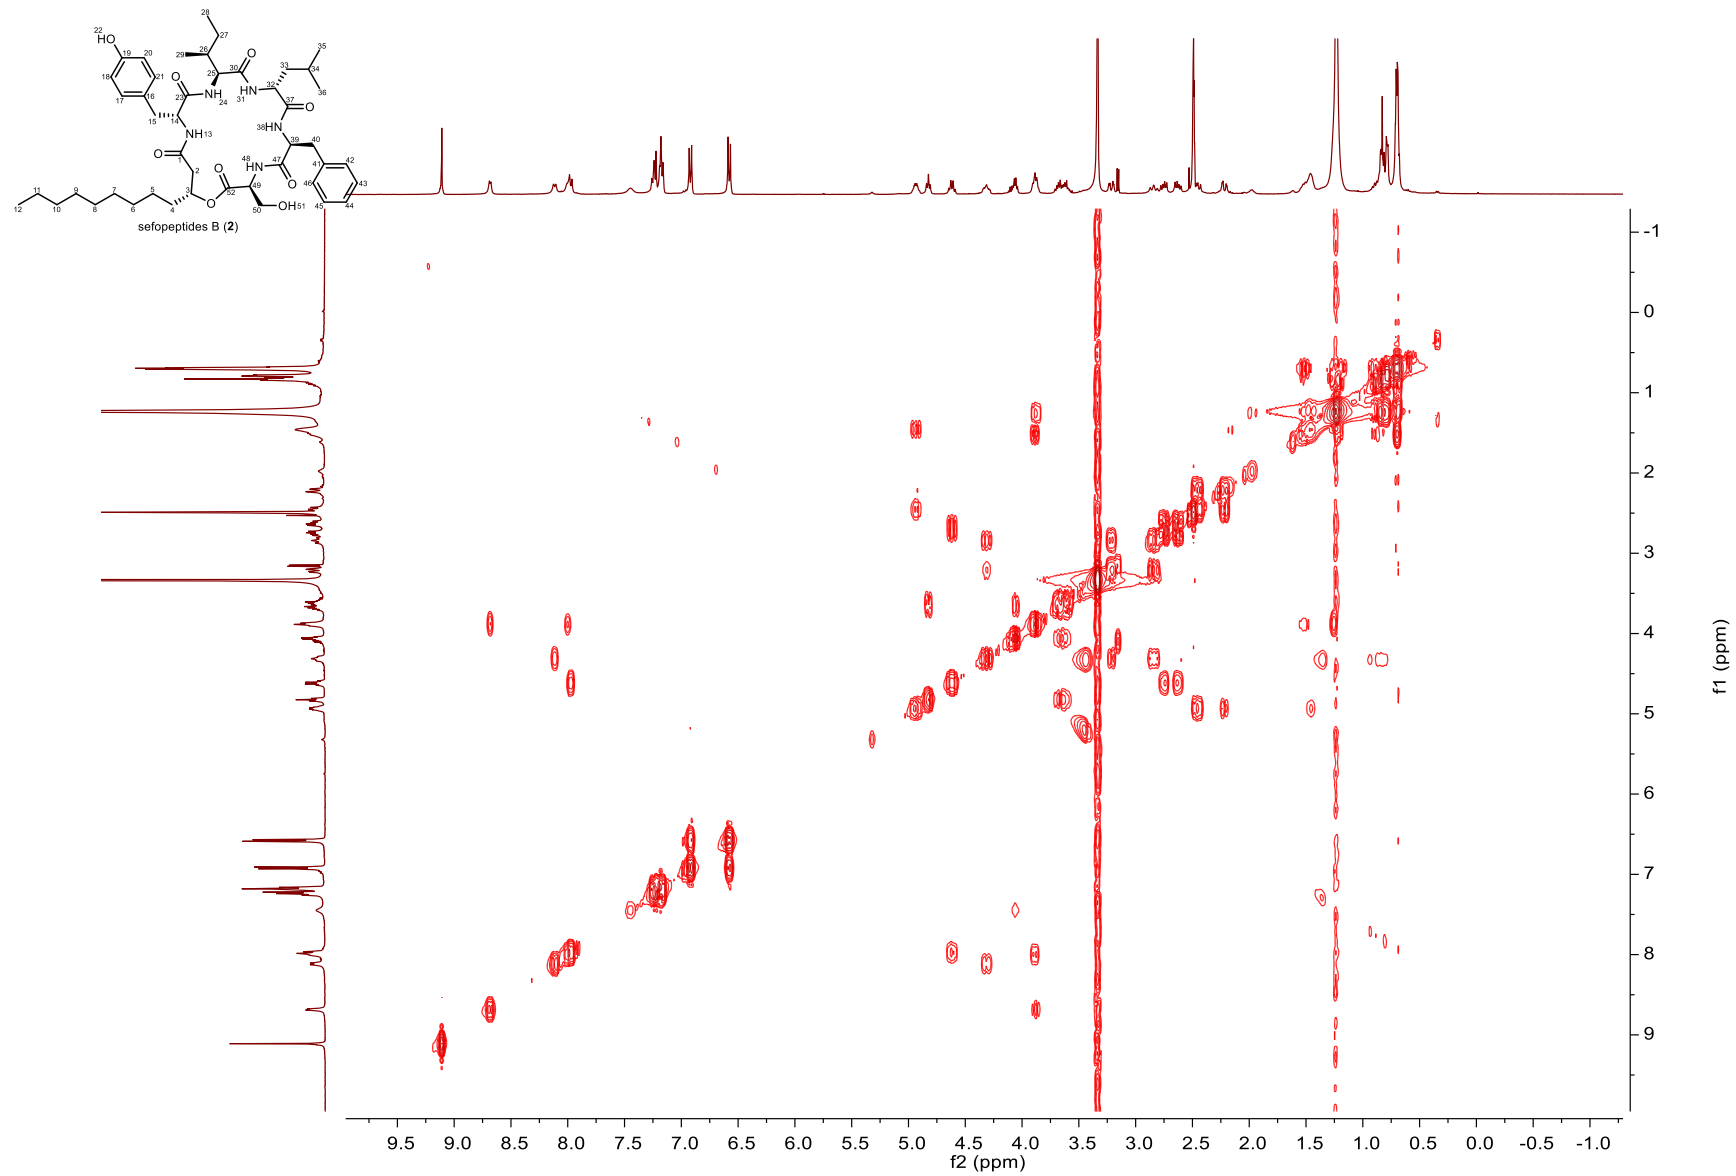

Fig. S21 <sup>1</sup>H-<sup>1</sup>H COSY (DMSO-*d*<sub>6</sub>) spectrum of sefopeptides B (2).

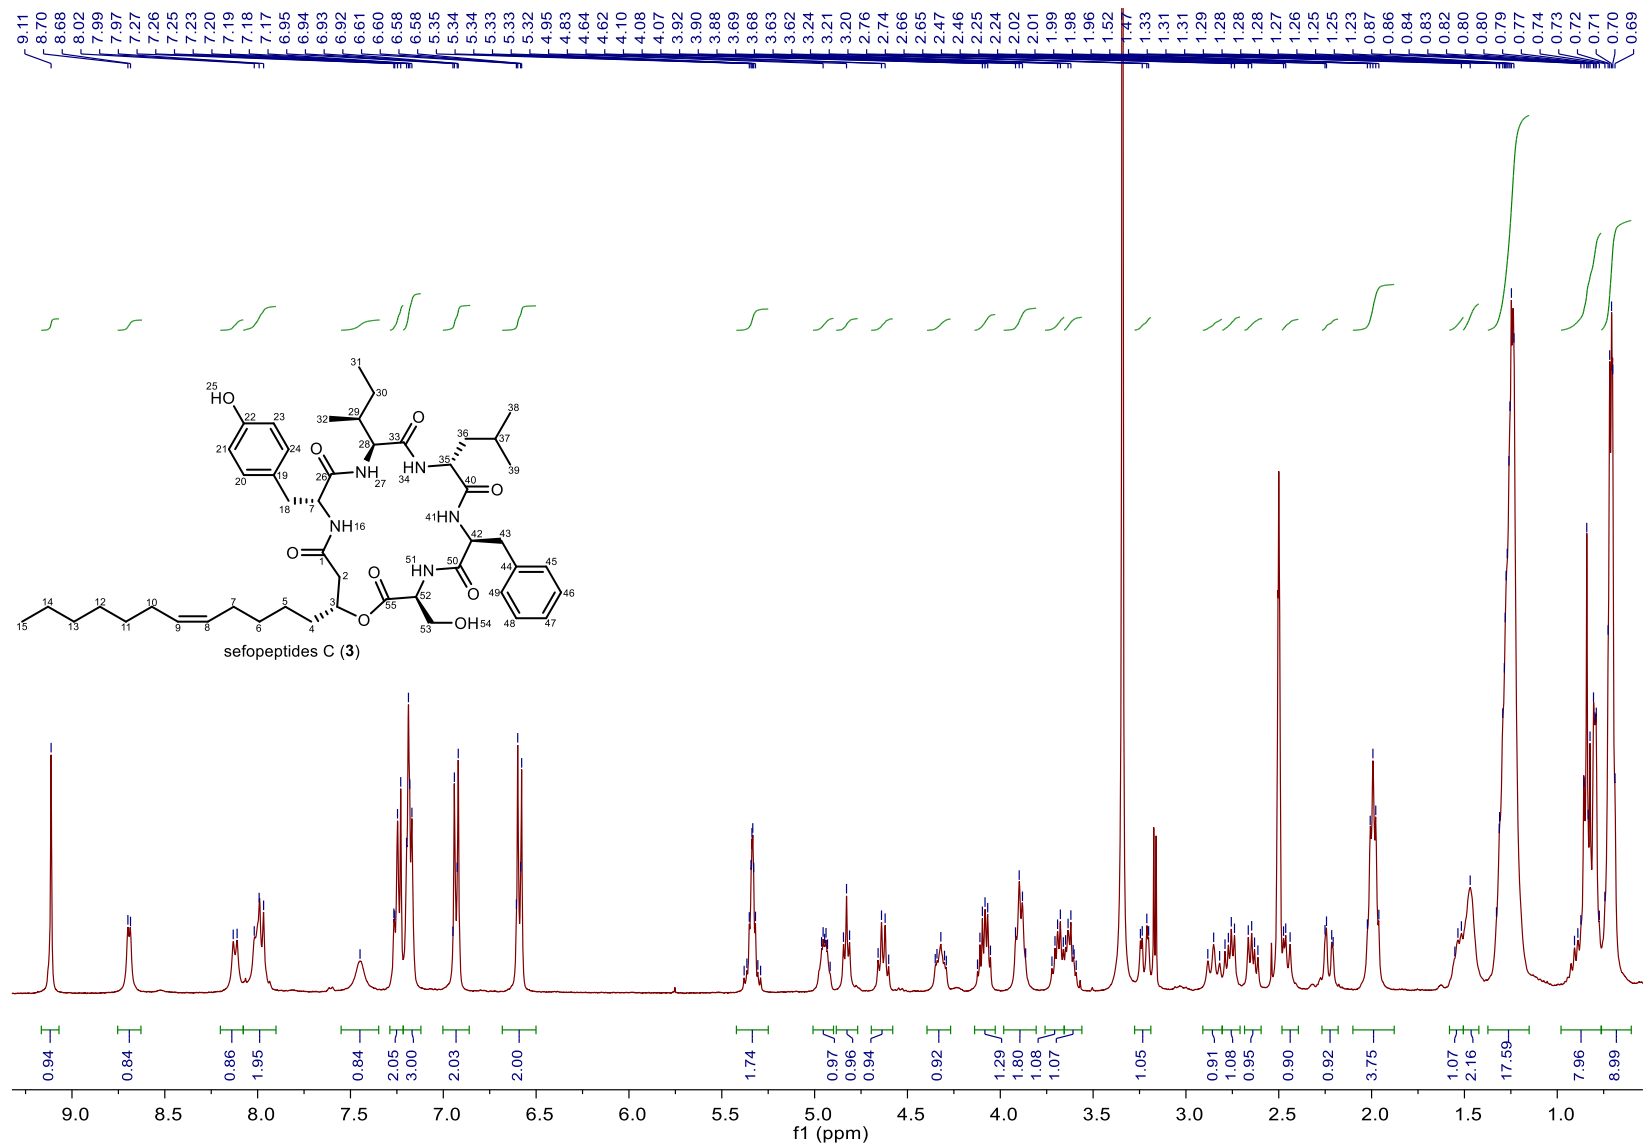

Fig. S22 <sup>1</sup>H NMR (400 MHz, DMSO-d<sub>6</sub>) spectrum of sefopeptides C (3).



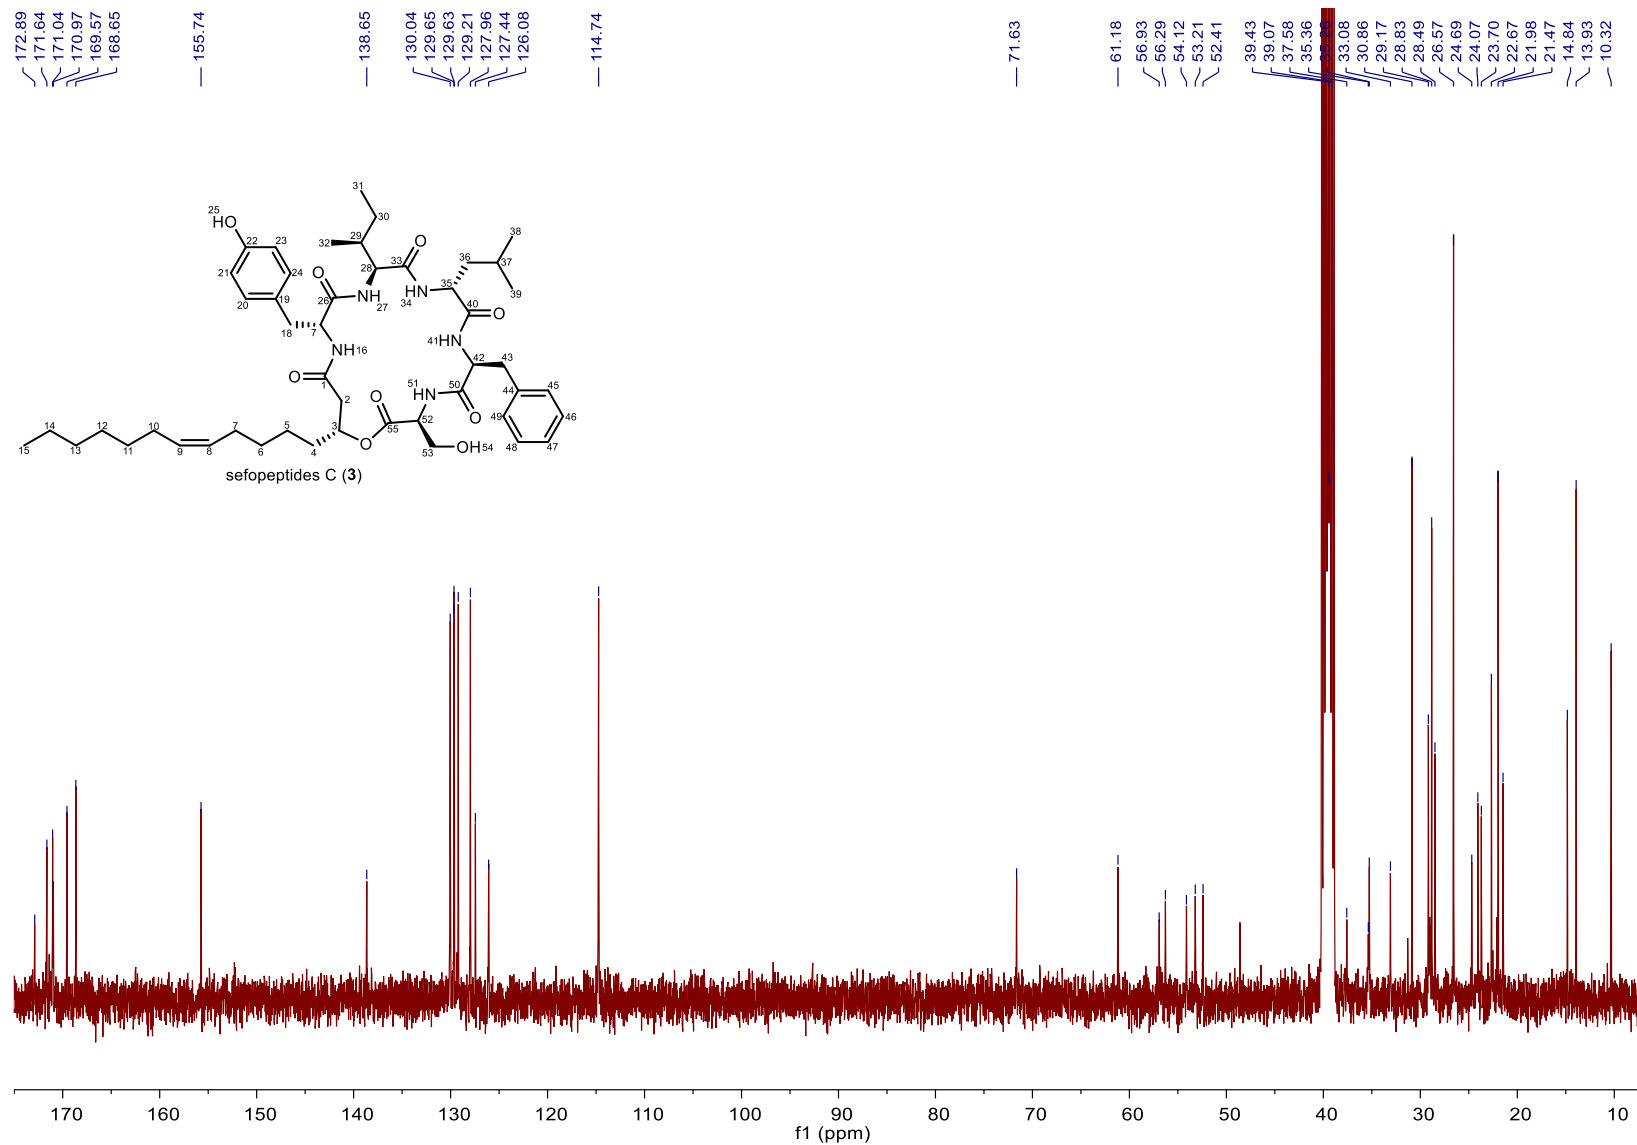

Fig. S23 <sup>13</sup>C NMR (100 MHz, DMSO-d<sub>6</sub>) spectrum of sefopeptides C (3).

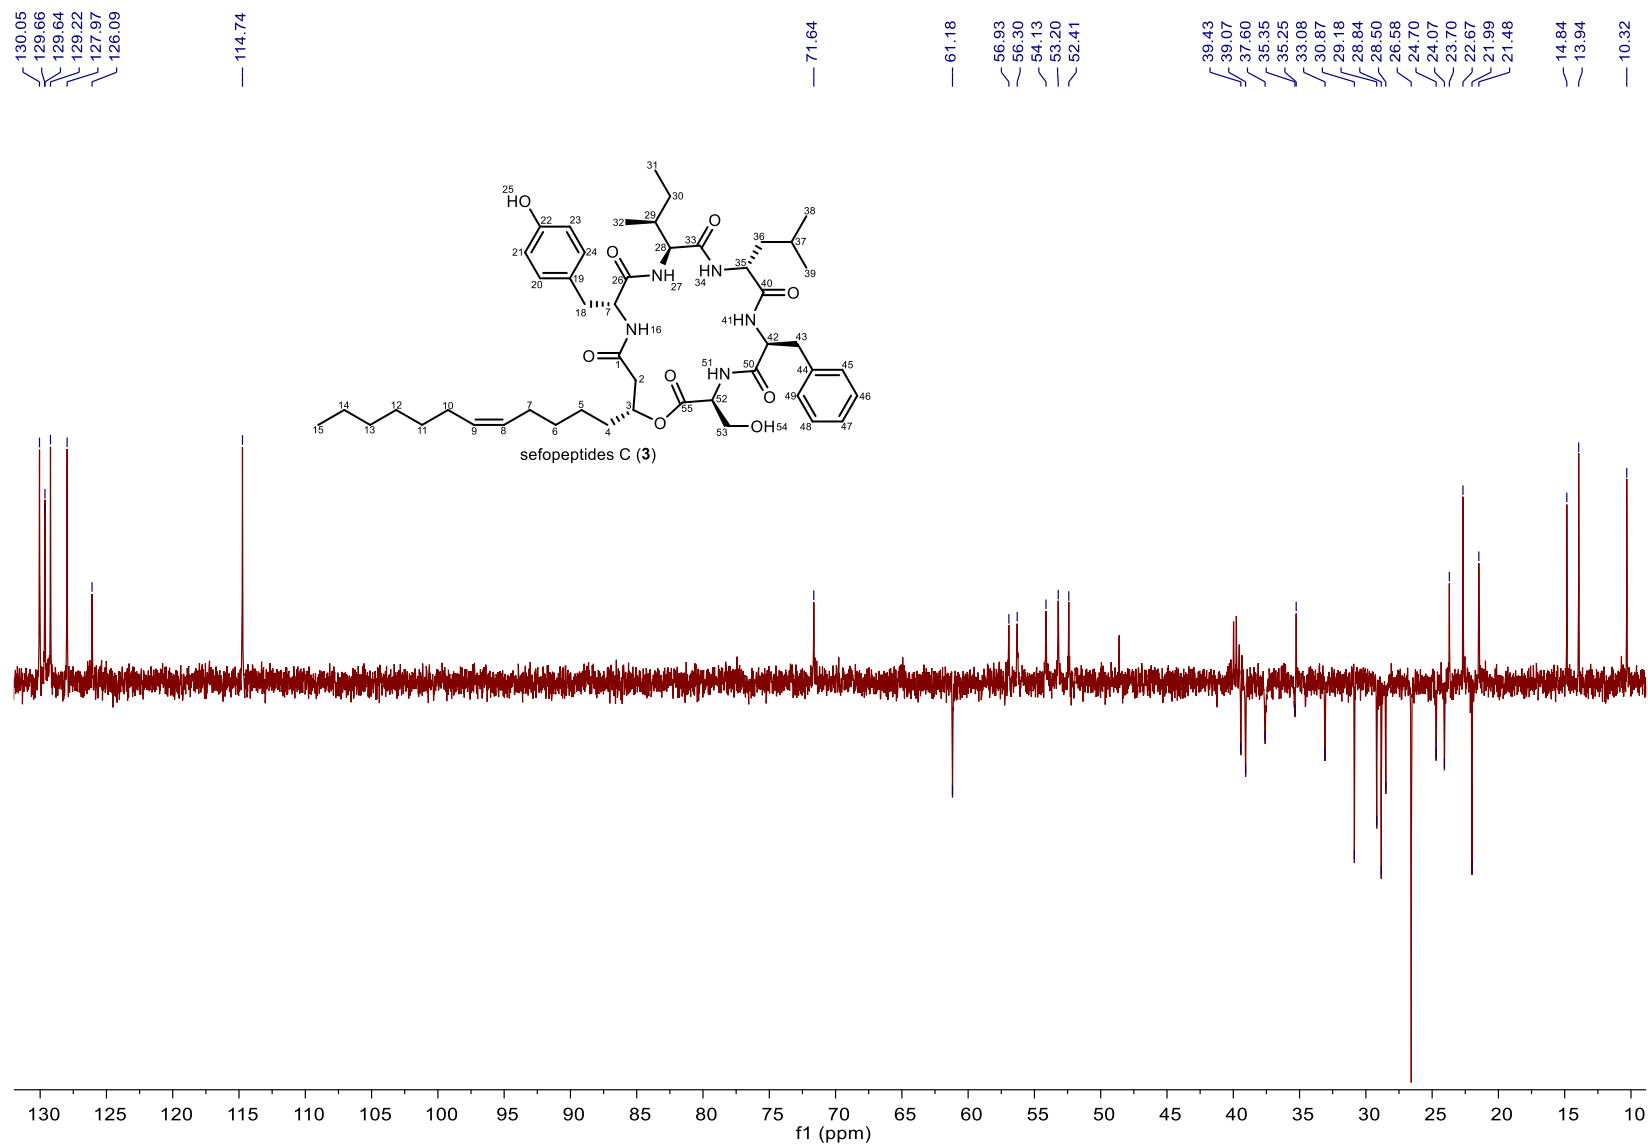

Fig. S24 DEPT-135 (100 MHz, DMSO- $d_6$ ) spectrum of sefopeptides C (3).

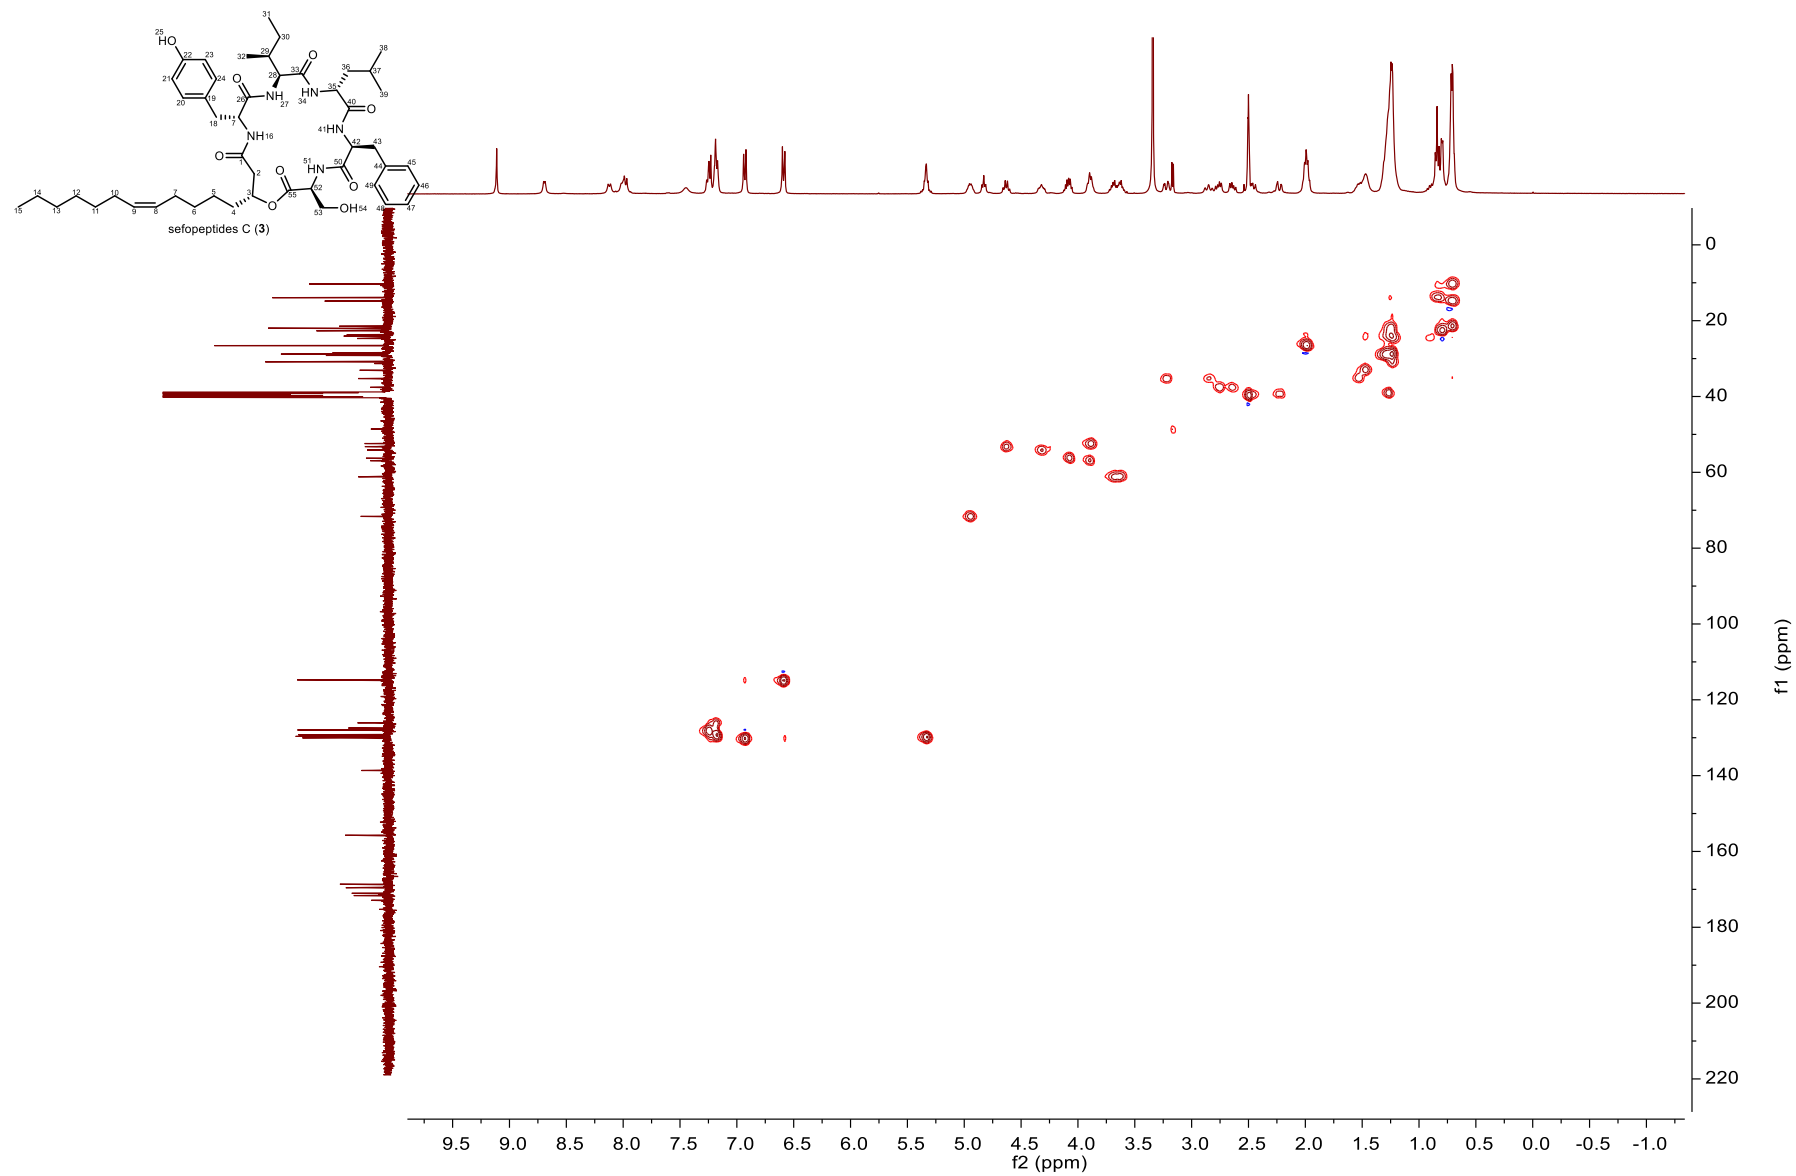

Fig. S25 HSQC (DMSO- $d_6$ ) spectrum of sefopeptides C (3).

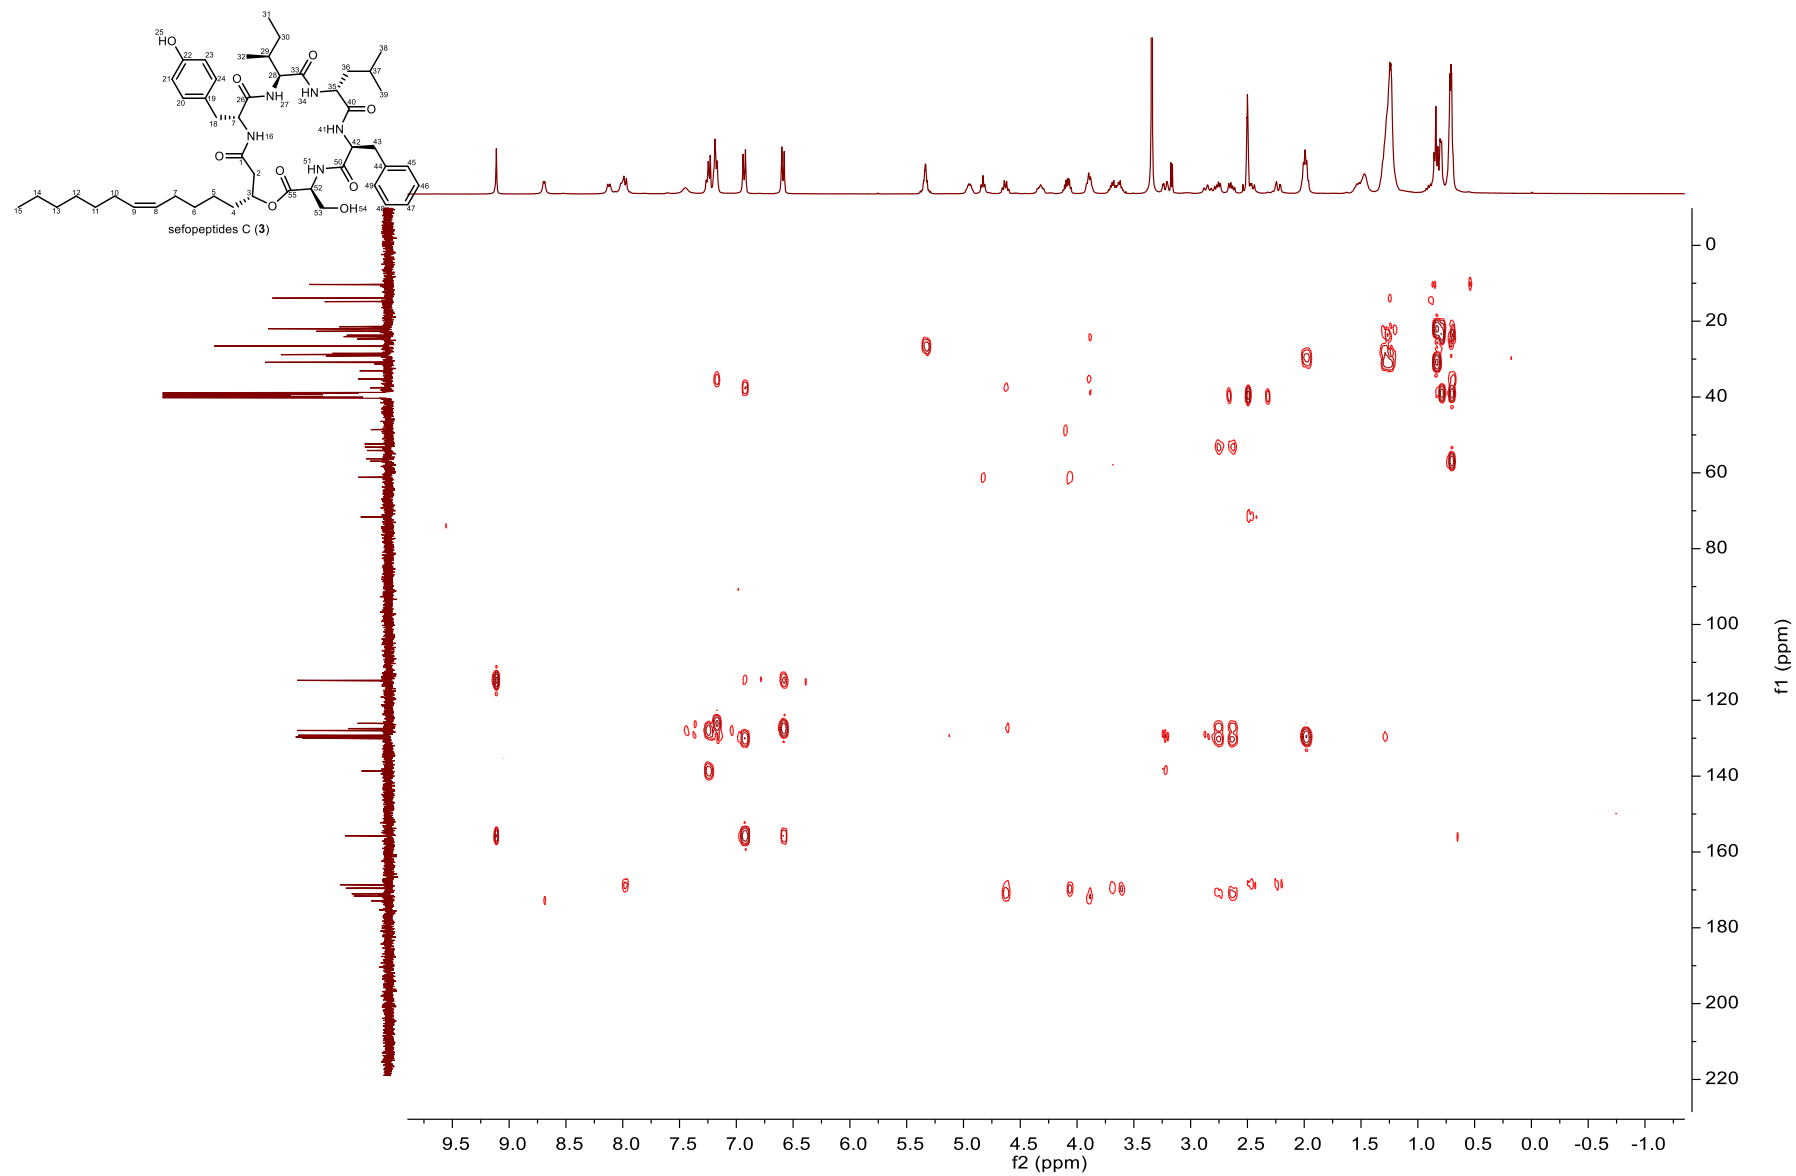

Fig. S26  $^1\text{H}$ - $^{13}\text{C}$  HMBC ( $\text{DMSO}-d_6$ ) spectrum of sefopeptides C (3).

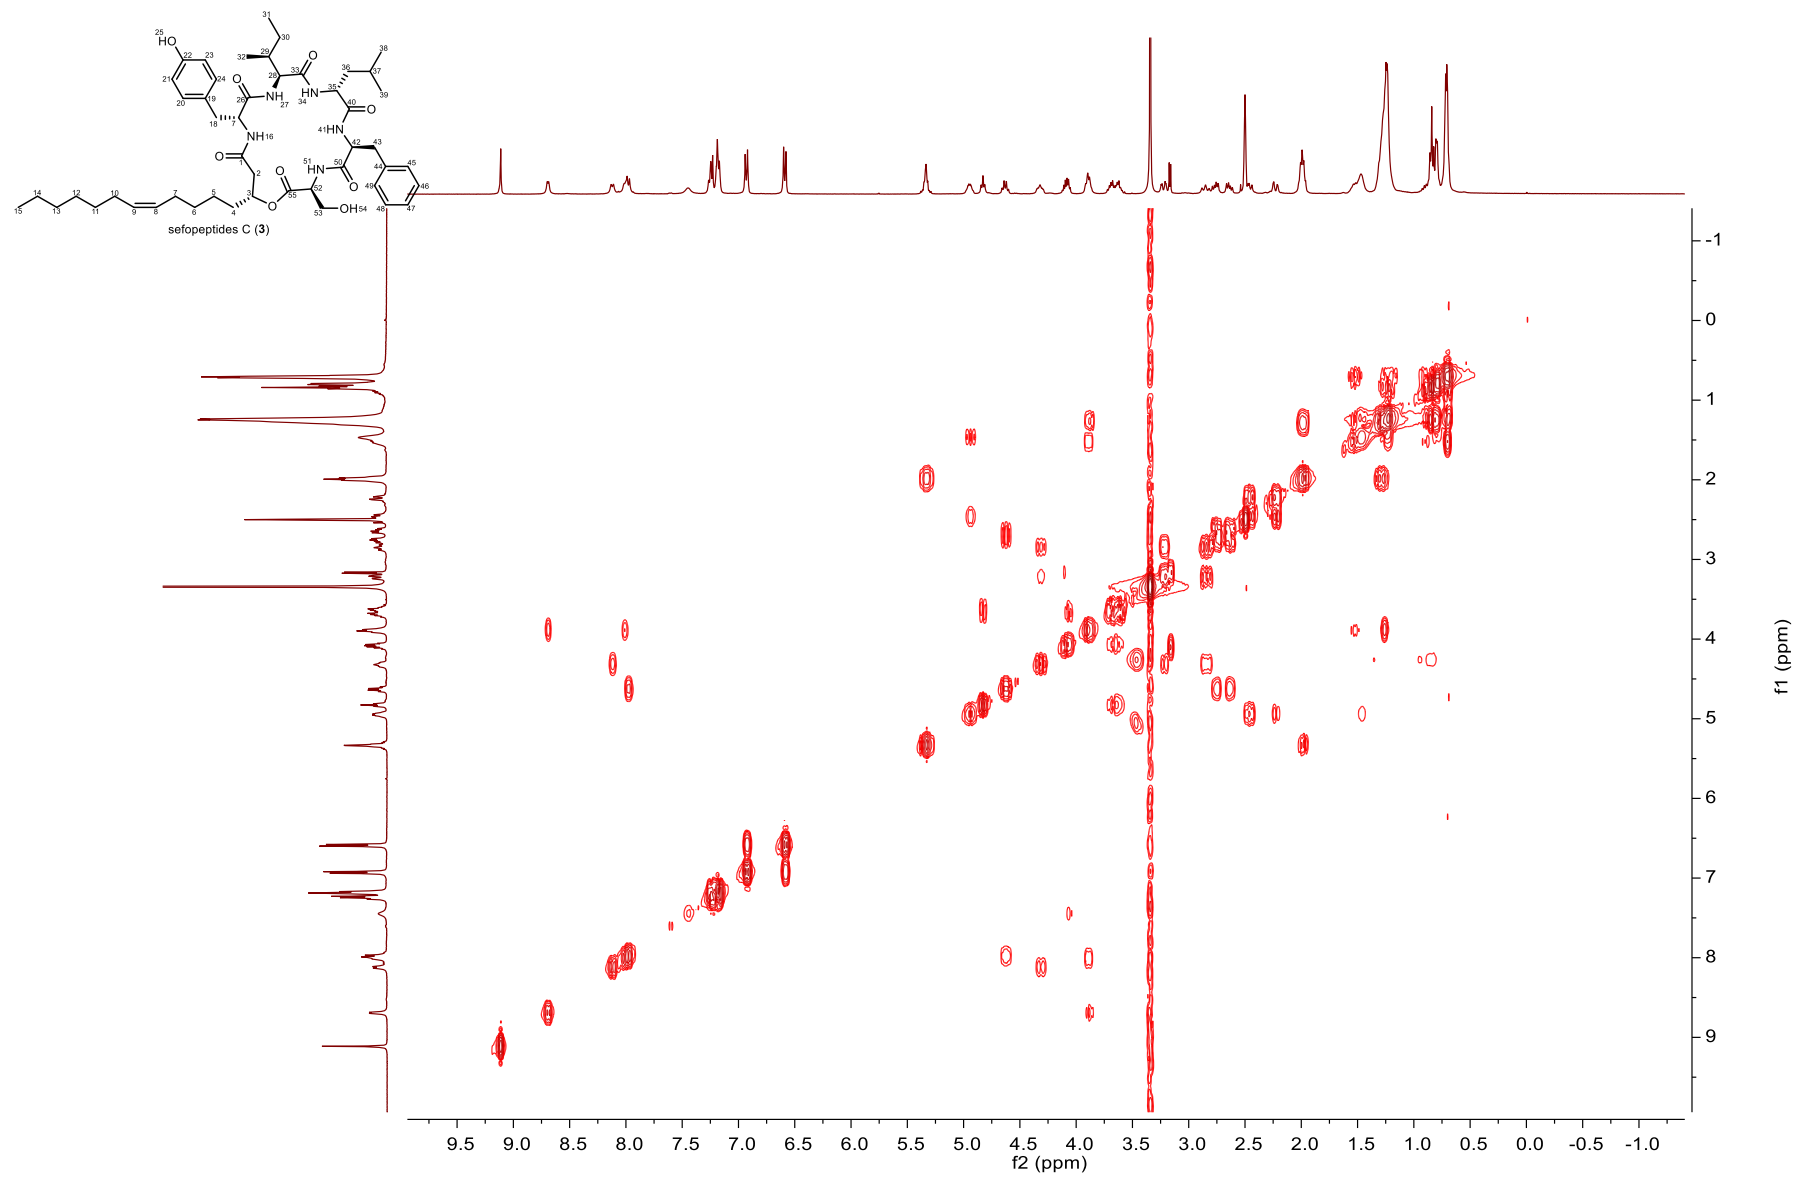

Fig. S27  $^1\text{H}$ - $^1\text{H}$  COSY (DMSO- $d_6$ ) spectrum of sefopeptides C (3).

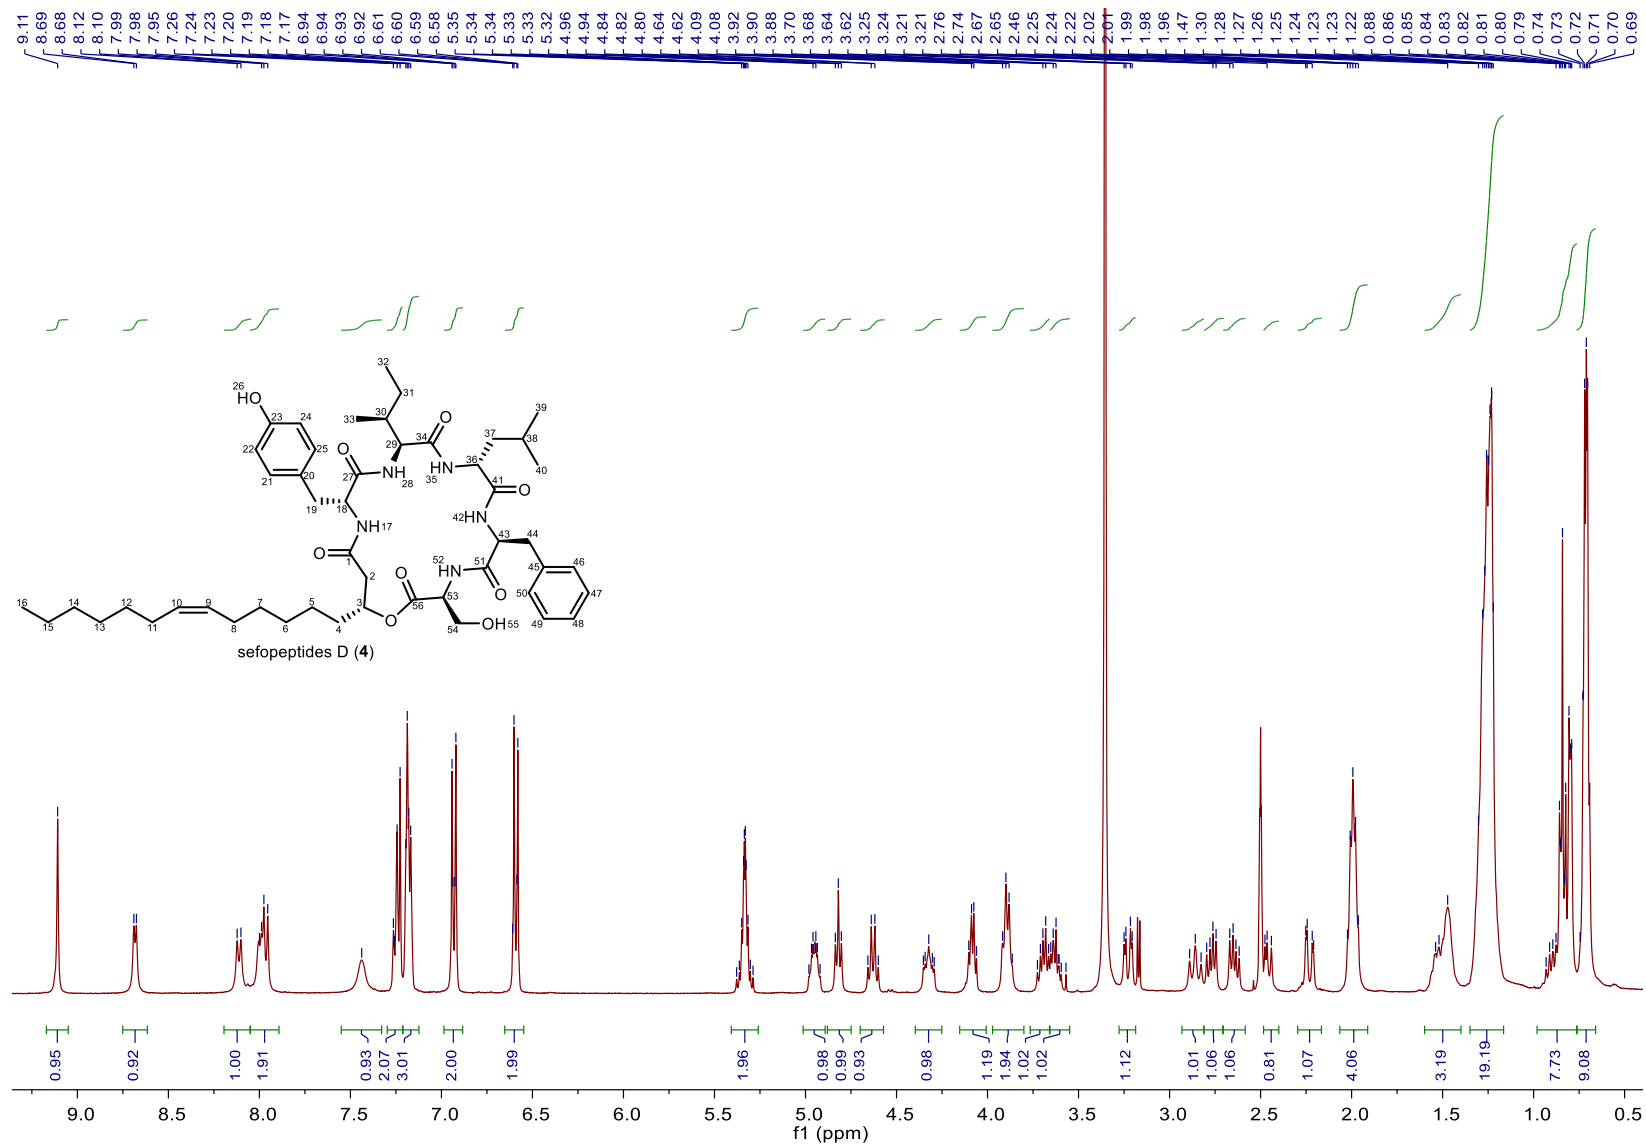

Fig. S28  $^1\text{H}$  NMR (400 MHz,  $\text{DMSO-}d_6$ ) spectrum of sefopeptides D (4).

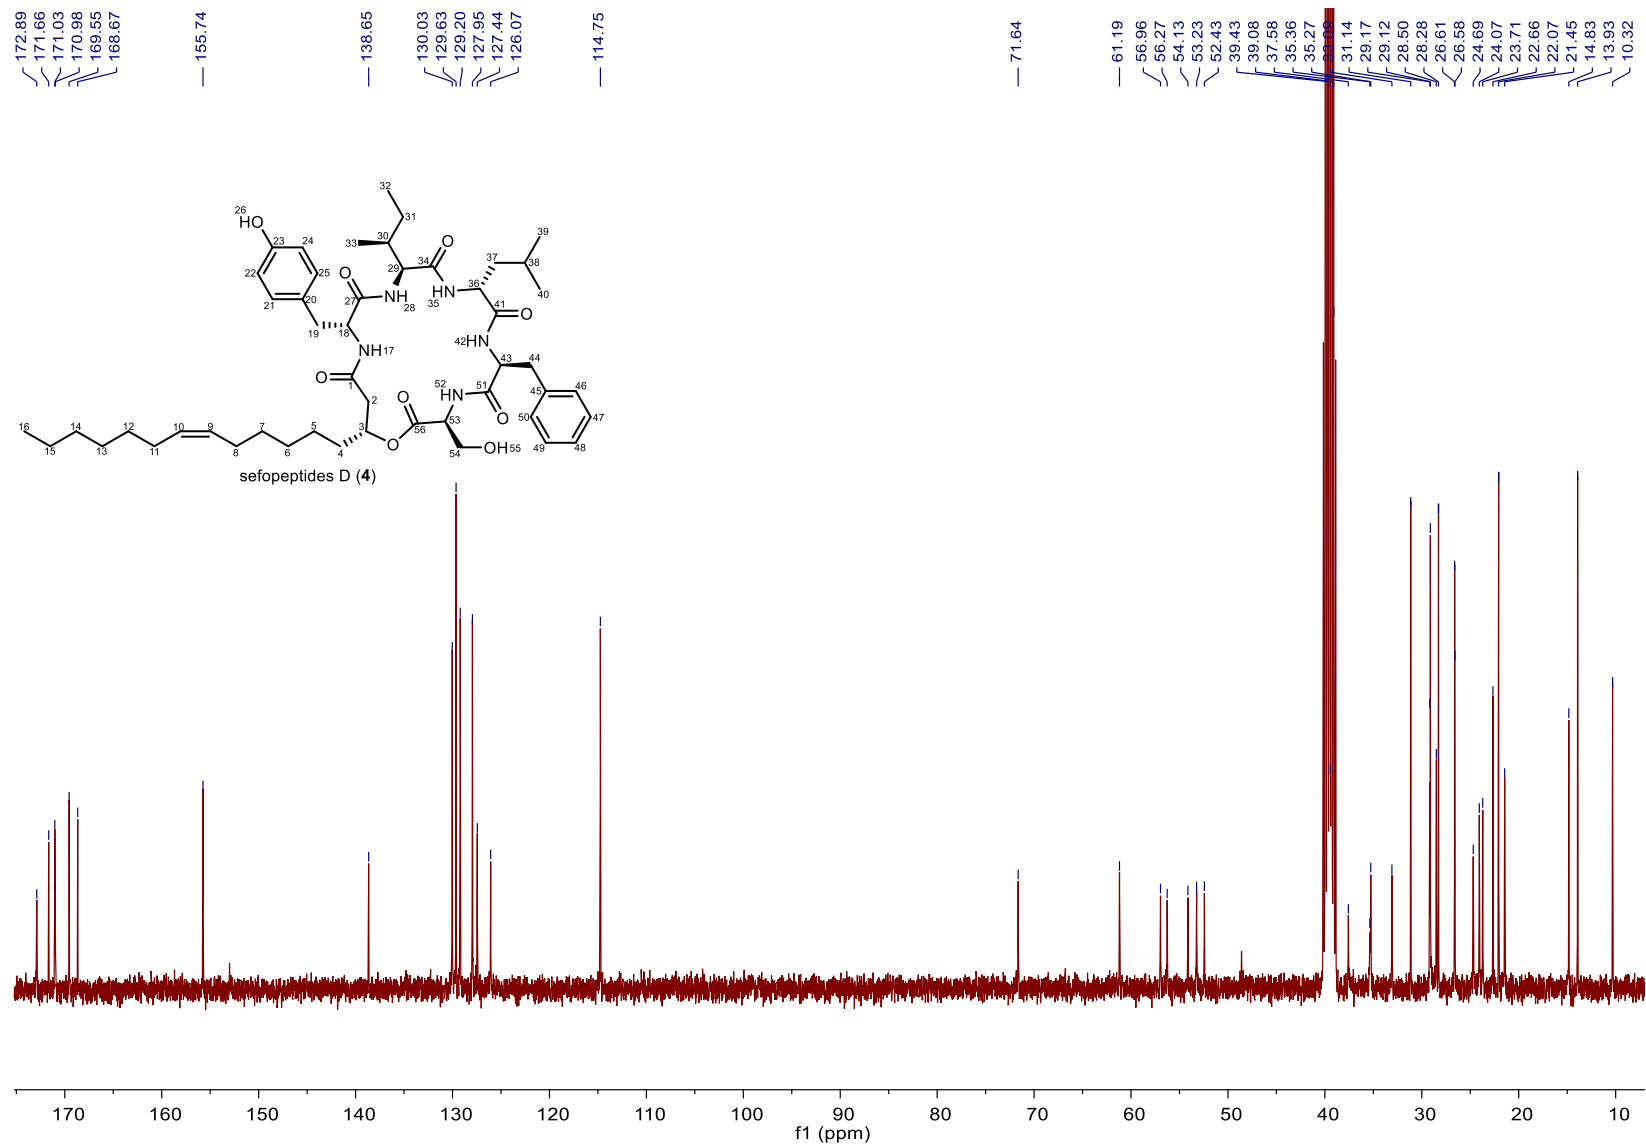

Fig. S29 <sup>13</sup>C NMR (100 MHz, DMSO-d<sub>6</sub>) spectrum of sefopeptides D (4).

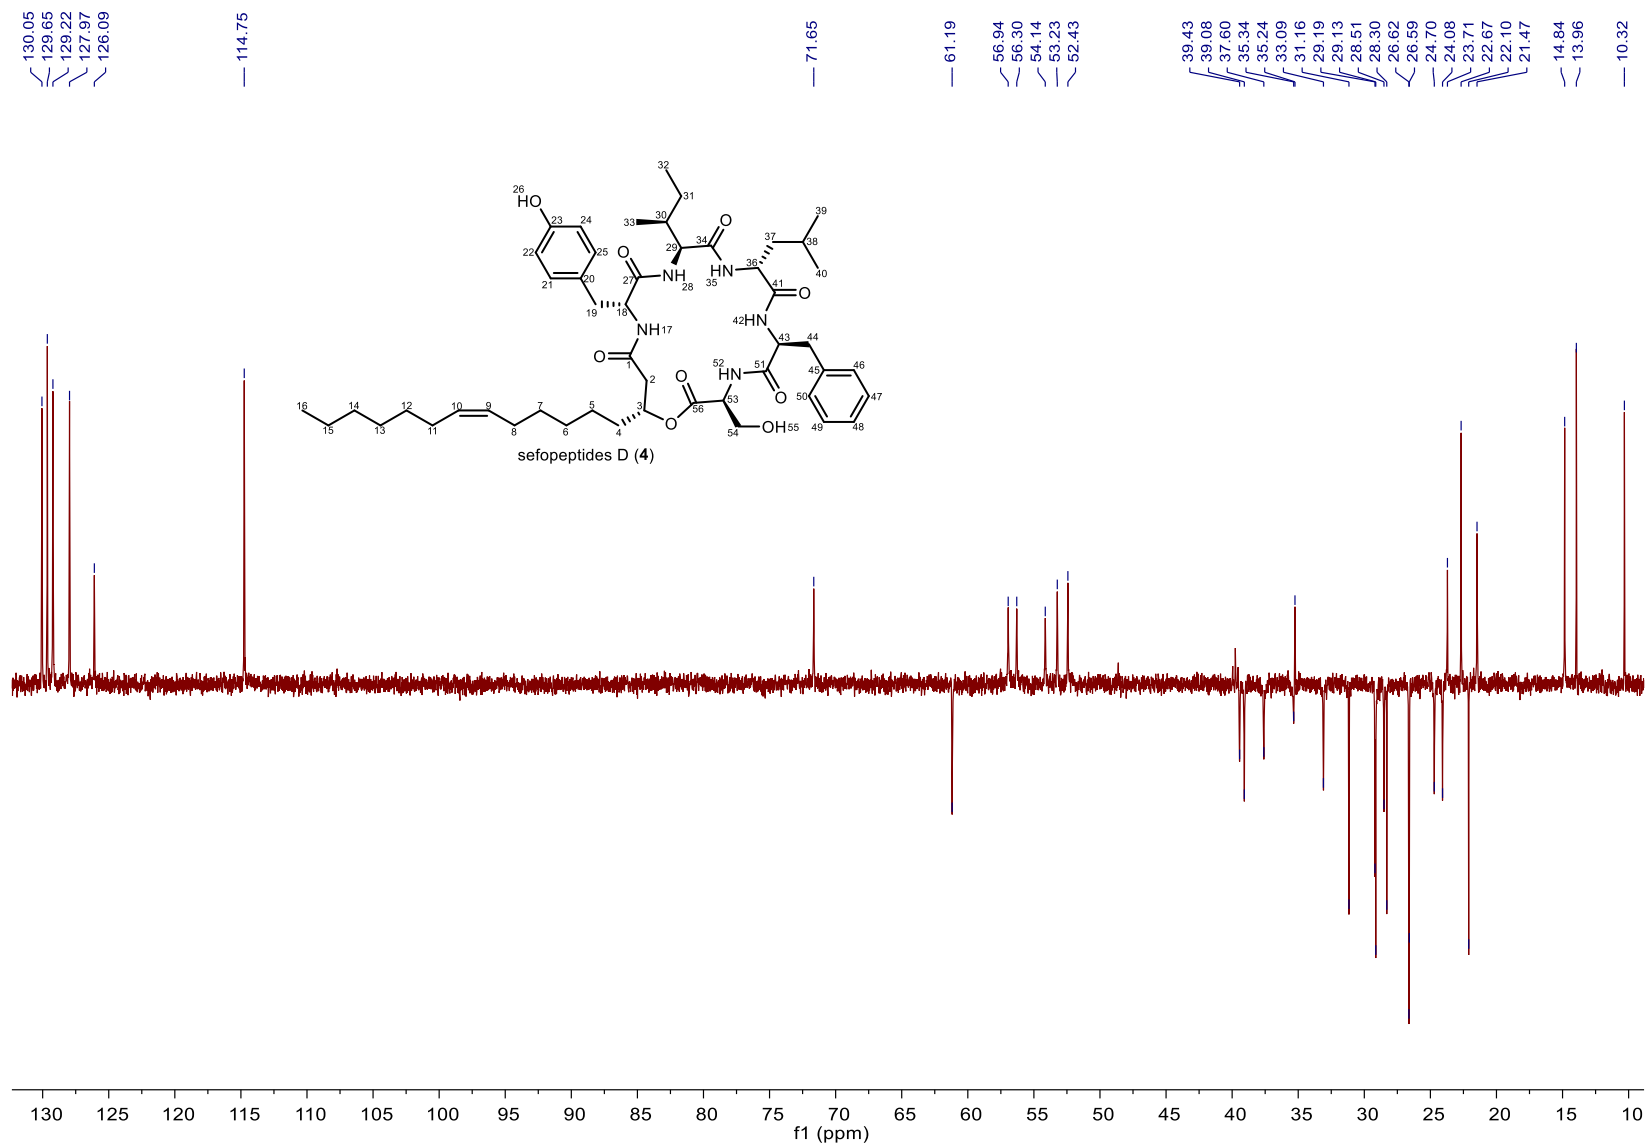

Fig. S30 DEPT-135 (100 MHz, DMSO-*d*<sub>6</sub>) spectrum of sefopeptides D (4).



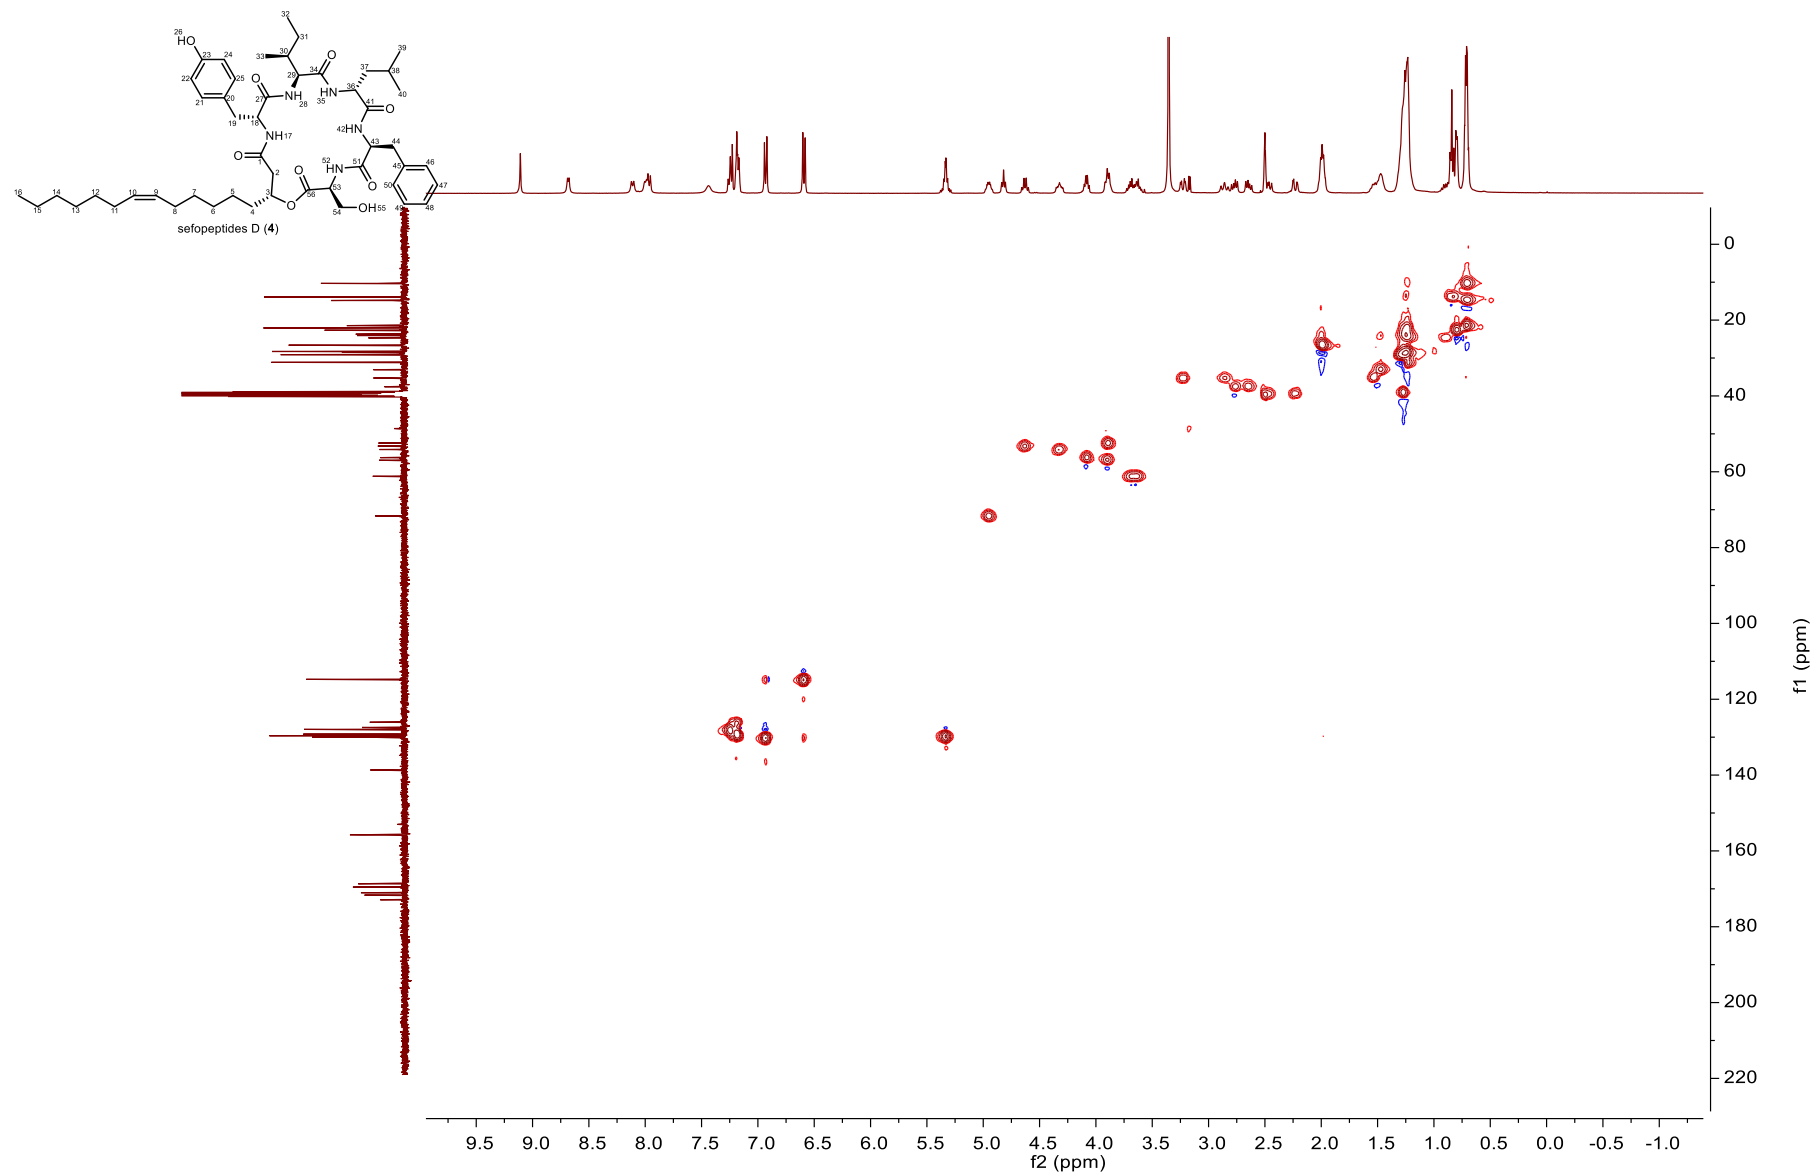

Fig. S31 HSQC (DMSO- $d_6$ ) spectrum of sefopeptides D (4).

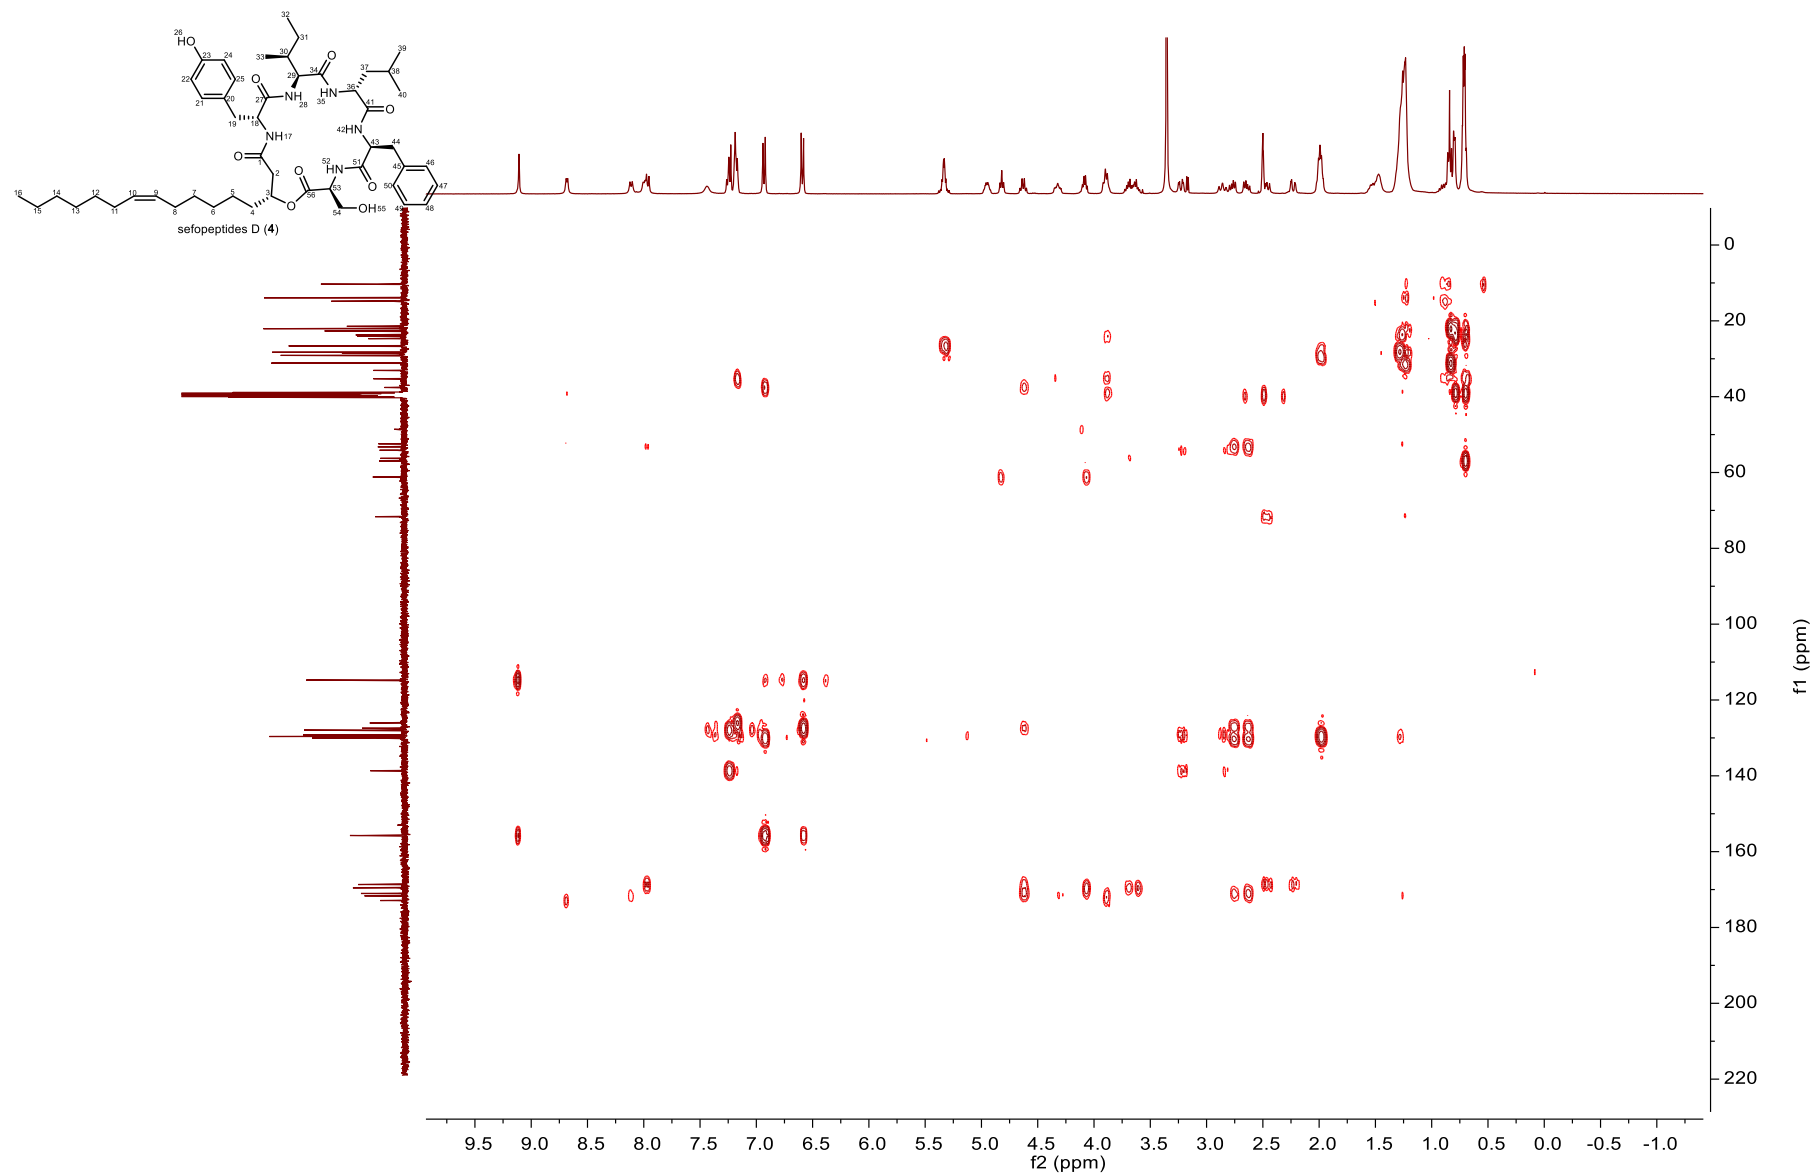

Fig. S32  $^1\text{H}$ - $^{13}\text{C}$  HMBC ( $\text{DMSO-}d_6$ ) spectrum of sefopeptides D (4).

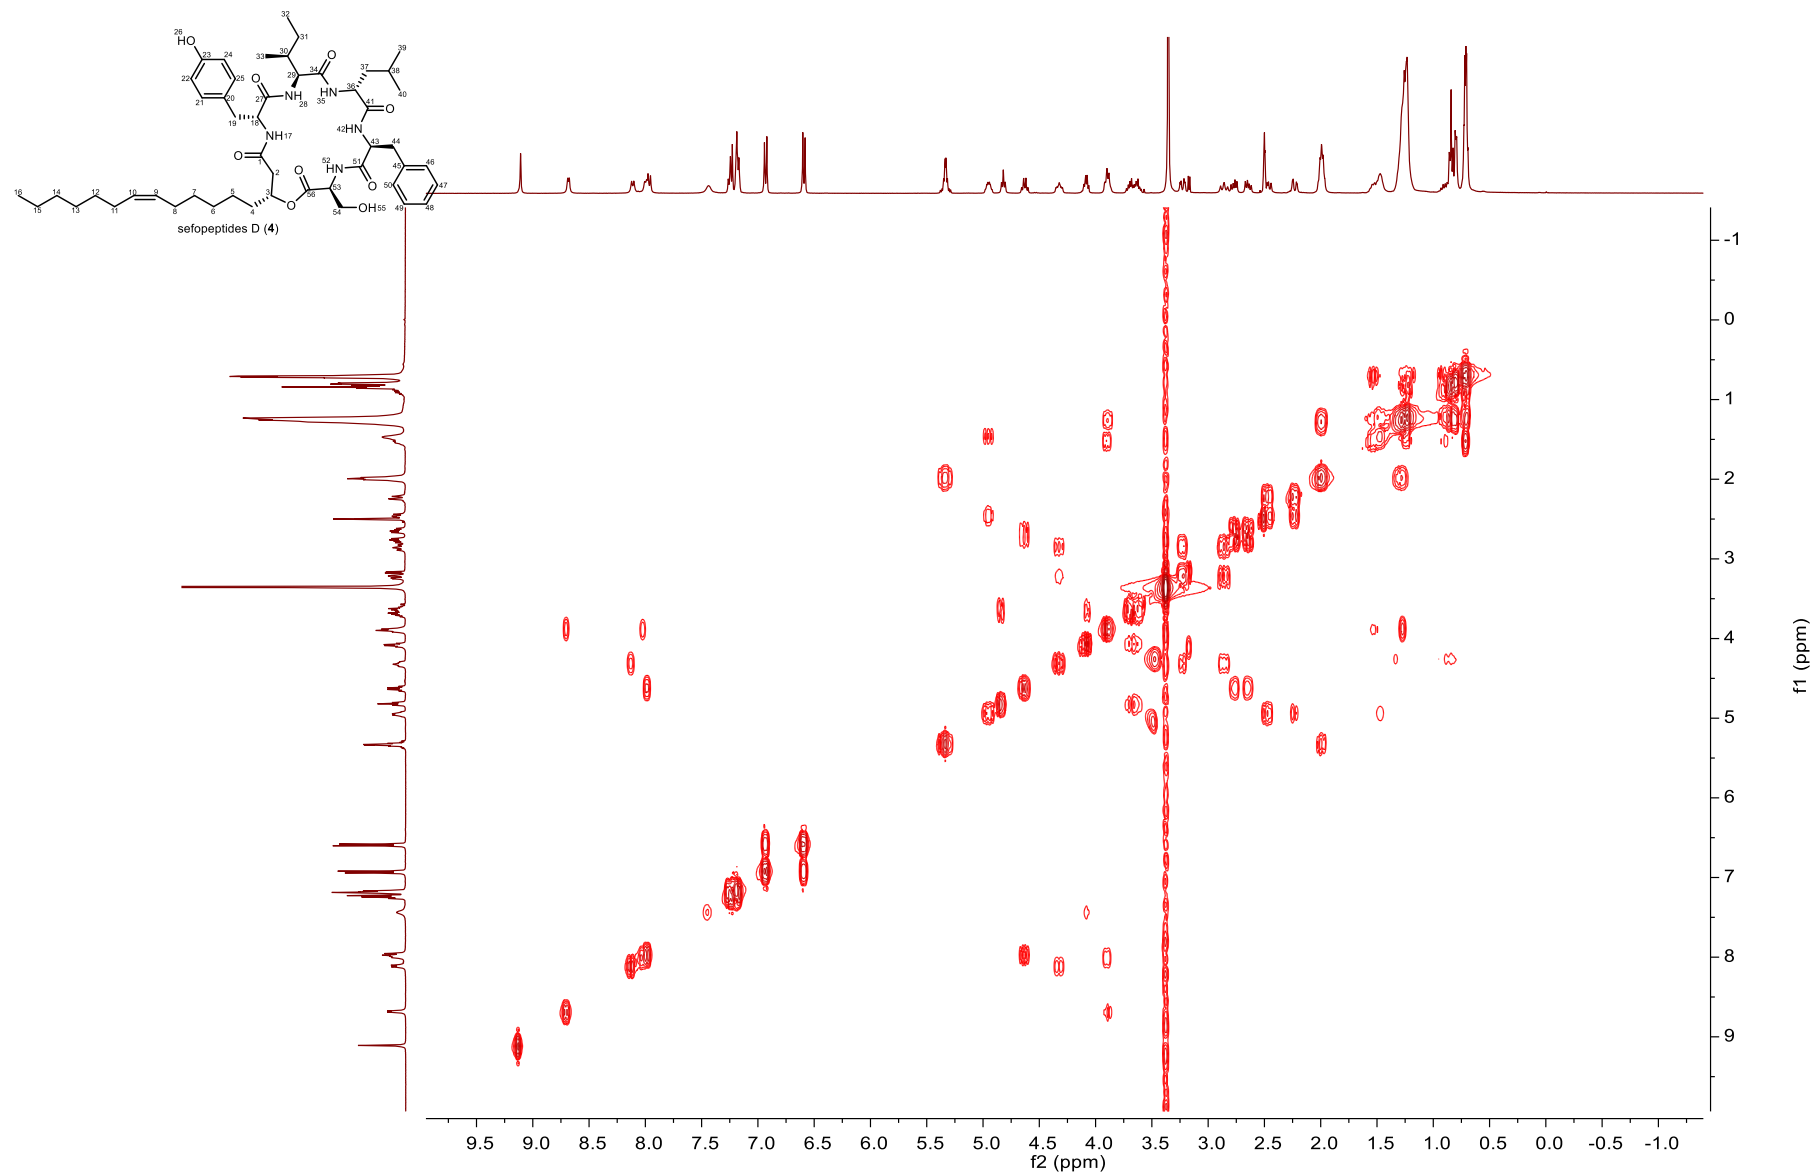

Fig. S33  $^1\text{H}$ - $^1\text{H}$  COSY (DMSO- $d_6$ ) spectrum of sefopeptides D (4).

1. B. A. Pfeifer, S. J. Admiraal, H. Gramajo, D. E. Cane and C. Khosla, *Science*, 2001, **291**, 1790-1792.
2. K. Blin, S. Shaw, H. E. Augustijn, Z. L. Reitz, F. Biermann, M. Alanjary, A. Fetter, B. R. Terlouw, W. W. Metcalf, E. J. N. Helfrich, G. P. van Wezel, M. H. Medema and T. Weber, *Nucleic Acids Res.*, 2023, **51**, W46-W50.
3. R. Bhushan and H. Bruckner, *Amino Acids*, 2004, **27**, 231-247.
4. J. M. Manning, *J. Am. Chem. Soc.*, 1970, **92**, 7449-7454.
